# Supplementary material for: Inventario de bienes de Olite (1496)
Source: MDPI journal article supplement (doi:10.3390/v16040590), 1978-01-01
Supplement: s1 [file Supplementary Tables.xlsx]

## Sheet: Supplementary Tables
Supplementary Tables
Table S1 Summary of clean data statistics of metagenomic sequencing and physicochemical data.
Table S2 Assembly qualities of the contigs.
Table S3 Physicochemical data of the Chaohu Lake samples.
Table S4 Detailed information of the MAGs.
Table S5 Detailed information of the vOTUs identified in samples.
Table S6 Relative abundance (expressed as RPKM values) table for 670 vOTUs in each sample
Table S7 Detailed information of virus-host linkages prediction.
Table S8 Annotation and abundance of the lytic viral AMGs.
Table S9 Annotation and abundance of the temperate viral AMGs.
Table S10 Clustered vOTUs among Chaohu Lake, other environmental virus sequences and viral RefSeq based on vConTACT2.
Table S11 Occurrence of viral clusters among Chaohu Lake, other environmental virus sequences and viral RefSeq based on vConTACT2.

## Sheet: S1
Sample ID	Depth(cm)	Clean data base (bp)	Number of Reads	GC	Q20	Q30
CES1	0-5	6114797606	20166450	58.34	98.37	95.45
CES2	5-10	6165344404	20264032	57.41	98.31	95.3
CES3	10-15	6263989380	20616190	56.89	98.29	95.2
CES4	15-20	6080366390	20013678	55.65	98.39	95.41
CES5	20-25	6216451068	20462452	54.96	98.37	95.38
CES6	25-30	6114962678	20134518	54.68	98.3	95.18
CES7	30-35	6564714364	21611460	54.01	98.35	95.31
CES8	35-40	6166001162	20285978	53.71	97.94	94.27
CES9	40-45	7854695036	25835679	53.19	98.31	95.17
CWS1	0-5	6314975210	20779920	58.43	98.22	95.06
CWS2	5-10	7629039978	25064788	57.54	98.22	94.98
CWS3	10-15	6036345032	19876863	56.76	98.24	94.98
CWS4	15-20	6208517958	20451452	56.28	98.27	95.06
CWS5	20-25	6513971086	21443830	55.05	98.32	95.2
CWS6	25-30	6076423230	19991907	54.53	98.31	95.18
CWS7	30-35	6501148672	21385641	53.54	98.3	95.15
CWS8	35-40	6585589936	21654278	52.66	98.27	95.06
CWS9	40-45	6492591858	21325855	53.05	98.24	94.97
CEW	water	6964593774	23006642	48.77	98.37	95.31
CWW	water	6324110938	20849555	46.23	98.3	95.13

## Sheet: S2
Assembly	CES1.contigs	CES2.contigs	CES3.contigs	CES4.contigs	CES5.contigs	CES6.contigs	CES7.contigs	CES8.contigs	CES9.contigs	CWS1.contigs	CWS2.contigs	CWS3.contigs	CWS4.contigs	CWS5.contigs	CWS6.contigs	CWS7.contigs	CWS8.contigs	CWS9.contigs	CEW.contigs	CWW.contigs
# contigs (>= 0 bp)	504100	476726	473340	516871	633748	612339	682873	673206	917420	527913	633776	487315	533368	580857	580268	674794	679790	688767	689597	635843
# contigs (>= 1000 bp)	12545	10292	12560	16262	25361	21731	39879	43589	72140	20220	24439	18257	20272	19147	35485	44237	40115	43934	93526	61343
# contigs (>= 5000 bp)	20	15	31	72	255	171	328	656	1856	83	215	71	50	103	793	1286	1071	1331	4123	3036
# contigs (>= 10000 bp)	3	1	1	6	35	30	34	58	323	6	11	4	2	11	98	190	170	263	1062	849
# contigs (>= 25000 bp)	1	1	0	0	2	2	3	3	14	0	0	2	1	1	4	9	11	8	204	138
# contigs (>= 50000 bp)	0	0	0	0	0	0	2	0	3	0	0	0	0	0	0	0	1	2	39	35
Total length (>= 0 bp)	230546408	214934451	219427348	242200974	310138295	294741987	355715117	361232228	523674427	257488331	308441104	234683813	256756046	275955843	308755067	367858216	361861402	374545856	482699562	398554843
Total length (>= 1000 bp)	17451167	14149967	17662479	23716838	39278734	32145410	63107975	72105023	128794196	29169015	37326892	26827581	29444289	27895756	61292523	79395030	70366151	78230124	198190091	128488933
Total length (>= 5000 bp)	172383	117892	186270	485773	1887365	1400137	2428323	4682595	15016529	567660	1428379	507601	328391	755424	5956638	9852807	8428471	10825587	41012495	30800554
Total length (>= 10000 bp)	61631	28882	10705	89956	484075	470610	597581	826788	4806696	81811	140741	88765	43906	156705	1402861	2673675	2450257	3748561	20758020	16031170
Total length (>= 25000 bp)	30396	28882	0	0	53072	56921	177474	94364	590371	0	0	62735	32587	25042	146983	268490	389530	297420	8398876	5933827
Total length (>= 50000 bp)	0	0	0	0	0	0	143270	0	226401	0	0	0	0	0	0	0	54309	133867	2909650	2512429
# contigs	119800	108267	119628	129091	176926	167839	217280	224253	335563	155013	178055	133903	145833	153961	185016	223201	218447	231434	302844	253577
Largest contig	30396	28882	10705	24547	27114	31232	82748	39075	84211	21402	20230	36501	32587	25042	41796	40230	54309	67287	207466	128227
Total length	85807126	76205389	85858522	95941497	137150172	126397180	179013524	190753139	302363599	116212070	136184008	101201705	110318744	114546321	159076127	196456252	186695625	200971648	339205364	256398562
GC (%)	58.15	57.3	56.72	54.66	53.75	53.6	53.3	53.22	52.73	59.34	57.65	57.26	56.59	54.35	53.61	53.05	51.76	52.62	49.15	46.18
N50	678	665	679	701	733	714	794	821	877	713	721	717	718	705	825	843	813	828	1215	1002
N90	523	521	523	525	529	527	535	538	543	527	528	527	528	526	537	539	536	538	576	557
auN	857.5	829.9	854.5	934.4	1069.8	1007.1	1208	1284.3	1656.4	933.4	1012.6	967.4	946	941.4	1421.3	1555.3	1500.9	1602	3539	3334.6
L50	44480	40857	44285	45960	60212	59300	69771	69425	96105	55246	61464	46945	51264	54993	55696	64842	65770	68546	67490	61054
L90	103001	93326	102822	110352	150218	143193	182608	187415	277426	132359	151518	114161	124333	131602	154274	185285	182329	192626	239486	204932

## Sheet: S3
Sample ID	Depth(cm)	TP (mg/kg)	TN (mg/kg)	NH4+ (mg/kg)	NO3- (mg/kg)	NO2- (mg/kg)	MC (%)	EC (μs/cm)	Salinity (mg/L)	pH	DOC (mg/g)	Temp (℃)	DO (mg/L)	Turbidity (NTU)
CES1	0-5	274.186	35.1434	22.1442	0.784788	0.147807	87.9	453.5	249	7.365	0.193735	-	-	-
CES2	5-10	384	35.1356	27.3488	1.13225	0.269151	83.05	456.5	251	7.235	0.136467	-	-	-
CES3	10-15	351.205	63.6198	33.2867	1.13519	0.129469	82.7	496	272.5	7.21	0.137613	-	-	-
CES4	15-20	351.2	48.6397	37.4732	1.16	0.133178	74.95	530.5	292	7.195	0.11437	-	-	-
CES5	20-25	436.244	49.5787	35.3653	1.22241	0.213715	70.85	543	298	7.25	0.113533	-	-	-
CES6	25-30	266.236	41.638	32.3628	0.75535	0.224578	67.85	535.5	294	7.27	0.116687	-	-	-
CES7	30-35	259.28	47.3646	25.7388	0.959057	0.155116	66.55	524.5	288.5	7.22	0.09872	-	-	-
CES8	35-40	238.41	33.7603	25.1989	0.851567	0.207849	64.3	471	258.5	7.21	0.07862	-	-	-
CES9	40-45	285.615	28.21	21.1485	0.783685	0.151539	65.5	453	249	7.275	0.0884867	-	-	-
CWS1	0-5	571.826	22.193	19.3237	0.900923	0.0032656	94.25	474	260.5	7.41	0.274	-	-	-
CWS2	5-10	665.739	31.9353	33.329	1.10989	0.0957863	89.7	537.5	295	7.24	0.2418	-	-	-
CWS3	10-15	866.484	45.0098	48.5595	0.738798	0.0530683	88.55	564	310.5	7.18	0.228067	-	-	-
CWS4	15-20	352.696	35.9951	35.7343	1.29868	0.0431752	76.15	551.5	303	7.3	0.167467	-	-	-
CWS5	20-25	430.708	37.4293	31.8249	1.34889	0.0624494	64.4	484.5	266.5	7.29	0.11572	-	-	-
CWS6	25-30	335.304	27.2949	29.0316	0.834756	0.0615492	59.35	447.5	245.5	7.265	0.10852	-	-	-
CWS7	30-35	633.441	30.0706	23.0413	0.667016	0.0480493	58.55	405.5	223	7.29	0.0873533	-	-	-
CWS8	35-40	448.596	32.1185	24.3742	0.928719	0.0230751	64.6	470.5	258.5	7.205	0.10586	-	-	-
CWS9	40-45	378.037	27.4494	23.9845	1.02457	0.0441289	62.1	436.5	240	7.12	0.124587	-	-	-
CEW	water	-	-	-	-	-	-	261	-	8.07	-	13.8333	7.53	114.333
CWW	water	-	-	-	-	-	-	308.75	-	8.0075	-	14.45	6.8	101.75

## Sheet: S4
MAGs	GTDB taxonomy
bin.14	d__Archaea;p__Thermoproteota;c__Bathyarchaeia;o__B26-1;f__;g__;s__
bin.24	d__Archaea;p__Thermoproteota;c__EX4484-205;o__EX4484-205;f__DTQO01;g__;s__
bin.59	d__Archaea;p__Thermoproteota;c__Bathyarchaeia;o__40CM-2-53-6;f__FEN-987;g__FEN-987;s__
bin.61	d__Archaea;p__Thermoproteota;c__Bathyarchaeia;o__40CM-2-53-6;f__;g__;s__
bin.65	d__Archaea;p__Thermoproteota;c__Bathyarchaeia;o__B26-1;f__UBA233;g__;s__
bin.66	d__Archaea;p__Halobacteriota;c__Methanomicrobia;o__Methanomicrobiales;f__JACTUA01;g__;s__
bin.74	d__Archaea;p__Thermoproteota;c__Bathyarchaeia;o__40CM-2-53-6;f__FEN-987;g__;s__
bin.78	d__Archaea;p__Thermoproteota;c__Nitrososphaeria;o__JACIWG01;f__JACIWG01;g__JACIWG01;s__
bin.88	d__Archaea;p__Thermoproteota;c__Nitrososphaeria;o__JACIWG01;f__JACIWG01;g__JACIWG01;s__
bin.1	d__Bacteria;p__Desulfobacterota_E;c__MBNT15;o__MBNT15;f__MBNT15;g__JAGGAJ01;s__
bin.10	d__Bacteria;p__Chloroflexota;c__Anaerolineae;o__Thermoflexales;f__Fen-1058;g__;s__
bin.100	d__Bacteria;p__Actinobacteriota;c__Acidimicrobiia;o__Acidimicrobiales;f__Ilumatobacteraceae;g__BACL27;s__BACL27 sp014190055
bin.101	d__Bacteria;p__Acidobacteriota;c__Holophagae;o__Holophagales;f__Holophagaceae;g__UBA12189;s__UBA12189 sp003530835
bin.102	d__Bacteria;p__Actinobacteriota;c__Actinomycetia;o__Nanopelagicales;f__Nanopelagicaceae;g__Nanopelagicus;s__
bin.104	d__Bacteria;p__Actinobacteriota;c__Actinomycetia;o__Nanopelagicales;f__Nanopelagicaceae;g__MAG-120802;s__MAG-120802 sp018969585
bin.105	d__Bacteria;p__Actinobacteriota;c__Actinomycetia;o__Nanopelagicales;f__Nanopelagicaceae;g__ZLKRG08;s__
bin.17	d__Bacteria;p__Planctomycetota;c__Phycisphaerae;o__Sedimentisphaerales;f__SG8-4;g__SG8-4;s__
bin.25	d__Bacteria;p__Elusimicrobiota;c__UBA5214;o__UBA5214;f__UBA5214;g__;s__
bin.26	d__Bacteria;p__Chloroflexota;c__Dehalococcoidia;o__GIF9;f__AB-539-J10;g__RBG-13-51-36;s__
bin.27	d__Bacteria;p__Chloroflexota;c__Anaerolineae;o__Anaerolineales;f__UBA4823;g__DSTM01;s__
bin.28	d__Bacteria;p__Patescibacteria;c__Saccharimonadia;o__Saccharimonadales;f__;g__;s__
bin.29	d__Bacteria;p__Proteobacteria;c__Gammaproteobacteria;o__Burkholderiales;f__Burkholderiaceae;g__Polynucleobacter;s__Polynucleobacter sp009928245
bin.31	d__Bacteria;p__Actinobacteriota;c__Acidimicrobiia;o__Acidimicrobiales;f__Ilumatobacteraceae;g__F1-60-MAGs027;s__
bin.32	d__Bacteria;p__Proteobacteria;c__Gammaproteobacteria;o__Burkholderiales;f__Methylophilaceae;g__Methylopumilus;s__
bin.33	d__Bacteria;p__Actinobacteriota;c__Acidimicrobiia;o__Acidimicrobiales;f__Ilumatobacteraceae;g__UBA3006;s__
bin.34	d__Bacteria;p__Chloroflexota;c__Limnocylindria;o__Limnocylindrales;f__Limnocylindraceae;g__Limnocylindrus;s__
bin.35	d__Bacteria;p__Proteobacteria;c__Gammaproteobacteria;o__Burkholderiales;f__Burkholderiaceae;g__UBA3064;s__UBA3064 sp005787245
bin.39	d__Bacteria;p__Proteobacteria;c__Gammaproteobacteria;o__Burkholderiales;f__Burkholderiaceae;g__UBA954;s__UBA954 sp002293155
bin.4	d__Bacteria;p__Chloroflexota;c__Dehalococcoidia;o__RBG-13-53-26;f__RBG-13-53-26;g__JAFGCL01;s__
bin.40	d__Bacteria;p__Nitrospirota;c__Nitrospiria;o__Nitrospirales;f__Nitrospiraceae;g__Nitrospira_D;s__
bin.42	d__Bacteria;p__Planctomycetota;c__Planctomycetia;o__Gemmatales;f__Gemmataceae;g__UBA969;s__UBA969 sp005786805
bin.43	d__Bacteria;p__Actinobacteriota;c__Actinomycetia;o__Nanopelagicales;f__AcAMD-5;g__ATZT02;s__ATZT02 sp005789325
bin.44	d__Bacteria;p__Bacteroidota;c__Bacteroidia;o__NS11-12g;f__UBA955;g__UBA955;s__UBA955 sp005788145
bin.46	d__Bacteria;p__Proteobacteria;c__Alphaproteobacteria;o__Rickettsiales;f__UBA1997;g__SYAR01;s__
bin.48	d__Bacteria;p__Gemmatimonadota;c__Gemmatimonadetes;o__Gemmatimonadales;f__Gemmatimonadaceae;g__PNKF01;s__PNKF01 sp903906325
bin.49	d__Bacteria;p__Nitrospirota;c__Nitrospiria;o__Nitrospirales;f__Nitrospiraceae;g__Nitrospira_D;s__
bin.5	d__Bacteria;p__Desulfobacterota_E;c__MBNT15;o__MBNT15;f__MBNT15;g__JAGGAJ01;s__
bin.50	d__Bacteria;p__Desulfobacterota_E;c__MBNT15;o__MBNT15;f__MBNT15;g__JAGGAJ01;s__
bin.51	d__Bacteria;p__Desulfobacterota;c__Desulfobacteria;o__Desulfobacterales;f__UBA2174_A;g__SpSt-501;s__
bin.52	d__Bacteria;p__Chloroflexota;c__Anaerolineae;o__Anaerolineales;f__EnvOPS12;g__UBA12294;s__
bin.53	d__Bacteria;p__Desulfobacterota;c__DSM-4660;o__Desulfatiglandales;f__HGW-15;g__DSXZ01;s__
bin.54	d__Bacteria;p__Desulfobacterota;c__Desulfobacteria;o__Desulfobacterales;f__UBA2174_A;g__SpSt-501;s__
bin.55	d__Bacteria;p__Desulfobacterota_E;c__MBNT15;o__MBNT15;f__MBNT15;g__JAGGAJ01;s__
bin.62	d__Bacteria;p__Chloroflexota;c__Dehalococcoidia;o__GIF9;f__AB-539-J10;g__RBG-13-51-36;s__
bin.63	d__Bacteria;p__Desulfobacterota_E;c__MBNT15;o__MBNT15;f__MBNT15;g__CSP1-8;s__CSP1-8 sp001443455
bin.69	d__Bacteria;p__Chloroflexota;c__Dehalococcoidia;o__GIF9;f__AB-539-J10;g__RBG-13-51-36;s__
bin.7	d__Bacteria;p__Chloroflexota;c__Dehalococcoidia;o__RBG-13-53-26;f__RBG-13-53-26;g__JAFGCL01;s__
bin.77	d__Bacteria;p__Chloroflexota;c__Anaerolineae;o__Anaerolineales;f__E44-bin32;g__W1033;s__
bin.82	d__Bacteria;p__Chloroflexota;c__Dehalococcoidia;o__GIF9;f__AB-539-J10;g__RBG-13-51-36;s__
bin.83	d__Bacteria;p__Acidobacteriota;c__Acidobacteriae;o__Bryobacterales;f__Bryobacteraceae;g__;s__
bin.87	d__Bacteria;p__Desulfobacterota_E;c__MBNT15;o__MBNT15;f__MBNT15;g__CSP1-8;s__CSP1-8 sp001443455
bin.92	d__Bacteria;p__Actinobacteriota;c__Actinomycetia;o__Nanopelagicales;f__Nanopelagicaceae;g__Nanopelagicus;s__
bin.93	d__Bacteria;p__Proteobacteria;c__Alphaproteobacteria;o__Pelagibacterales;f__Pelagibacteraceae;g__Fonsibacter;s__Fonsibacter ubiquis
bin.94	d__Bacteria;p__Actinobacteriota;c__Acidimicrobiia;o__Acidimicrobiales;f__Ilumatobacteraceae;g__F1-60-MAGs027;s__F1-60-MAGs027 sp005793215
bin.95	d__Bacteria;p__Actinobacteriota;c__Actinomycetia;o__Nanopelagicales;f__Nanopelagicaceae;g__MAG-120802;s__MAG-120802 sp003569145
bin.96	d__Bacteria;p__Planctomycetota;c__UBA1135;o__UBA2386;f__UBA2386;g__;s__
bin.98	d__Bacteria;p__Cyanobacteria;c__Cyanobacteriia;o__Cyanobacteriales;f__Nostocaceae;g__Dolichospermum;s__Dolichospermum circinale
bin.99	d__Bacteria;p__Actinobacteriota;c__Actinomycetia;o__Nanopelagicales;f__Nanopelagicaceae;g__MAG-120802;s__

## Sheet: S5
contig_id	contig_length	provirus	proviral_length	checkv_quality	completeness	Virsorter2 score	Deepvirfinder score	Deepvirfinder p-value	Virsorter2 score>0.9	Deepvirfinder score>=0.9＆ p-value<0.05	lifestyle	taxa via LCA	taxa via PhaGCN2	source
k141_102874_flag=0_multi=11.6952_len=16202	16202	No	NA	Low-quality	13.2	1	0.870145	0.02013	Yes	No	Lytic	Myoviridae	unknown	CEW
k141_103430_flag=0_multi=12.7231_len=10066	10066	No	NA	Low-quality	23.62	1	0.779083	0.026928	Yes	No	Lytic	Siphoviridae	unknown	CEW
k141_103884_flag=1_multi=13.0000_len=64382	64382	No	NA	Low-quality	38.81	1	0.960685	0.012274	Yes	Yes	Lytic	#N/A	Kyanoviridae	CWW
k141_104715_flag=0_multi=16.7578_len=12361	12361	No	NA	Low-quality	9.36	1	0.933841	0.015258	Yes	Yes	Lytic	#N/A	unknown	CWW
k141_105543_flag=1_multi=11.0000_len=13238	13238	No	NA	Low-quality	7.47	0.993	0.957232	0.012784	Yes	Yes	Lytic	#N/A	unknown	CEW
k141_107095_flag=0_multi=10.9933_len=14146	14146	No	NA	Low-quality	18.45	0.98	0.969833	0.010877	Yes	Yes	Lytic	#N/A	unknown	CWW
k141_108427_flag=1_multi=13.0000_len=11364	11364	No	NA	Low-quality	26.07	1	0.635645	0.038579	Yes	No	Lytic	#N/A	unknown	CES9
k141_109360_flag=0_multi=28.9453_len=22647	22647	No	NA	Low-quality	3.46	0.507	0.930615	0.015541	No	Yes	Lytic	#N/A	unknown	CEW
k141_110068_flag=0_multi=14.6074_len=13014	13014	No	NA	Low-quality	15.47	0.993	0.99998	0.000831	Yes	Yes	Lytic	#N/A	unknown	CWW
k141_110139_flag=0_multi=14.7748_len=10470	10470	No	NA	Low-quality	15.29	0.967	0.581269	0.044358	Yes	No	Lytic	#N/A	unknown	CWW
k141_11096_flag=0_multi=17.9840_len=23490	23490	No	NA	Medium-quality	65.92	1	0.997171	0.005117	Yes	Yes	Lytic	#N/A	unknown	CWW
k141_116426_flag=0_multi=33.9637_len=20134	20134	No	NA	Low-quality	8.84	0.993	0.978015	0.009536	Yes	Yes	Lytic	Myoviridae	Kyanoviridae	CWW
k141_116830_flag=1_multi=10.0000_len=14045	14045	No	NA	Low-quality	22.15	0.953	0.985634	0.008441	Yes	Yes	Lytic	#N/A	unknown	CWS2
k141_117504_flag=0_multi=37.0000_len=28582	28582	No	NA	Medium-quality	52.02	1	0.97893	0.009423	Yes	Yes	Lytic	#N/A	Autographiviridae	CWW
k141_117738_flag=0_multi=16.9710_len=12284	12284	No	NA	Low-quality	15.83	1	0.993669	0.00659	Yes	Yes	Lytic	#N/A	unknown	CEW
k141_117838_flag=1_multi=12.0000_len=15057	15057	No	NA	Low-quality	19.7	0.827	0.93775	0.014956	No	Yes	Lytic	#N/A	unknown	CWW
k141_118150_flag=0_multi=24.8902_len=11562	11562	No	NA	Low-quality	7.76	1	0.999997	0.00051	Yes	Yes	Lytic	Myoviridae	unknown	CWW
k141_119729_flag=1_multi=14.6512_len=14174	14174	No	NA	Low-quality	45.04	0.993	0.726794	0.030931	Yes	No	Lytic	#N/A	unknown	CWW
k141_120128_flag=1_multi=9.8481_len=11711	11711	No	NA	Not-determined	NA	0.927	0.59184	0.043432	Yes	No	Lytic	#N/A	unknown	CES8
k141_120423_flag=0_multi=14.3270_len=26693	26693	No	NA	Medium-quality	66.15	1	0.998821	0.003871	Yes	Yes	Lytic	#N/A	unknown	CWW
k141_120446_flag=0_multi=20.2052_len=11167	11167	No	NA	Low-quality	19.01	0.96	0.085187	0.199373	Yes	No	Lytic	#N/A	Mesyanzhinovviridae	CEW
k141_120655_flag=0_multi=11.9161_len=19992	19992	No	NA	Low-quality	11.91	0.887	0.999856	0.001907	No	Yes	Lytic	#N/A	Kyanoviridae	CEW
k141_121675_flag=1_multi=10.0000_len=21308	21308	No	NA	Low-quality	12.55	0.98	0.595233	0.04296	Yes	No	Lytic	#N/A	Kyanoviridae	CEW
k141_122478_flag=0_multi=14.9489_len=22624	22624	No	NA	Medium-quality	65.45	1	0.900589	0.017656	Yes	Yes	Lytic	#N/A	unknown	CWW
k141_122951_flag=1_multi=15.9777_len=39219	39219	No	NA	Low-quality	18.59	0.993	0.920374	0.016334	Yes	Yes	Lytic	#N/A	Straboviridae	CEW
k141_123677_flag=1_multi=9.0000_len=11483	11483	No	NA	Not-determined	NA	0	0.904404	0.017392	No	Yes	Lytic	#N/A	unknown	CES9
k141_123844_flag=0_multi=15.0477_len=11094	11094	No	NA	Low-quality	14.52	0.973	0.856427	0.021074	Yes	No	Lytic	#N/A	unknown	CWW
k141_124340_flag=0_multi=18.9801_len=20086	20086	No	NA	Low-quality	22.47	0.967	0.999986	0.000793	Yes	Yes	Lytic	#N/A	unknown	CES5
k141_126441_flag=0_multi=17.9814_len=20255	20255	No	NA	Low-quality	1.53	0.987	0.779002	0.026966	Yes	No	Lytic	#N/A	unknown	CWW
k141_129276_flag=1_multi=8.0000_len=19405	19405	No	NA	Low-quality	5.62	1	0.93953	0.014805	Yes	Yes	Lytic	Myoviridae	Straboviridae	CWW
k141_1307_flag=0_multi=18.2305_len=13840	13840	Yes	6579	Low-quality	5.97	0.94	0.995682	0.005835	Yes	Yes	Temperate	#N/A	Kyanoviridae	CWW
k141_130814_flag=1_multi=12.0000_len=26172	26172	No	NA	Low-quality	13.74	0.98	0.993162	0.006723	Yes	Yes	Lytic	#N/A	Kyanoviridae	CEW
k141_132963_flag=0_multi=13.9597_len=14352	14352	No	NA	Low-quality	16.42	0.987	0.82151	0.023586	Yes	No	Lytic	#N/A	unknown	CEW
k141_133229_flag=3_multi=27.0967_len=24811	24811	No	NA	Medium-quality	76.36	1	0.947978	0.013917	Yes	Yes	Lytic	#N/A	Peduoviridae	CEW
k141_134967_flag=1_multi=17.9838_len=19650	19650	No	NA	Medium-quality	57.5	1	0.915424	0.01658	Yes	Yes	Lytic	#N/A	Straboviridae	CWW
k141_135676_flag=0_multi=10.8332_len=10061	10061	No	NA	Low-quality	4.38	1	0.926815	0.015843	Yes	Yes	Lytic	Myoviridae	Kyanoviridae	CWW
k141_135855_flag=0_multi=11.9210_len=10944	10944	No	NA	Low-quality	27.23	0.967	0.999944	0.001227	Yes	Yes	Lytic	#N/A	Kyanoviridae	CEW
k141_136213_flag=0_multi=16.9043_len=46242	46242	No	NA	Complete	100	1	0.980924	0.009177	Yes	Yes	Lytic	#N/A	unknown	CEW
k141_136767_flag=1_multi=8.0000_len=11258	11258	No	NA	Low-quality	6.58	0.987	0.998952	0.003701	Yes	Yes	Lytic	Myoviridae	Kyanoviridae	CEW
k141_137395_flag=1_multi=7.0000_len=11954	11954	No	NA	Low-quality	7.15	1	0.999771	0.002077	Yes	Yes	Lytic	#N/A	Kyanoviridae	CEW
k141_139015_flag=0_multi=11.0000_len=11379	11379	No	NA	Low-quality	20.03	0.993	0.940082	0.014805	Yes	Yes	Lytic	#N/A	unknown	CWW
k141_139094_flag=1_multi=10.0000_len=13216	13216	No	NA	Low-quality	15.88	0.52	0.904811	0.017354	No	Yes	Lytic	#N/A	unknown	CWS2
k141_139222_flag=1_multi=11.8541_len=22610	22610	No	NA	Low-quality	9.11	0.953	0.999995	0.000548	Yes	Yes	Lytic	Myoviridae	Kyanoviridae	CEW
k141_141830_flag=0_multi=14.0000_len=39584	39584	No	NA	Medium-quality	66.62	1	0.950127	0.013577	Yes	Yes	Lytic	#N/A	unknown	CEW
k141_141842_flag=1_multi=8.0000_len=11914	11914	No	NA	Low-quality	6.19	1	0.999954	0.001095	Yes	Yes	Lytic	Myoviridae	Kyanoviridae	CEW
k141_142165_flag=0_multi=13.2951_len=21990	21990	No	NA	Low-quality	34.93	1	0.958896	0.012558	Yes	Yes	Lytic	#N/A	unknown	CWW
k141_142165_flag=1_multi=7.0000_len=11344	11344	No	NA	Low-quality	18.71	0.933	0.998828	0.003871	Yes	Yes	Lytic	#N/A	unknown	CEW
k141_143431_flag=1_multi=12.8997_len=21487	21487	No	NA	Low-quality	45.19	1	1	0	Yes	Yes	Lytic	#N/A	Zobellviridae	CWW
k141_144467_flag=0_multi=9.5382_len=10802	10802	No	NA	Low-quality	10.15	0.987	0.104483	0.18725	Yes	No	Lytic	#N/A	unknown	CWW
k141_145855_flag=0_multi=14.1012_len=57370	57370	No	NA	Low-quality	37.07	0.7	0.98016	0.009253	No	Yes	Temperate	#N/A	Straboviridae	CEW
k141_145925_flag=1_multi=11.8300_len=18501	18501	No	NA	Low-quality	17.66	0.947	0.744955	0.029553	Yes	No	Lytic	#N/A	Demerecviridae	CWW
k141_146655_flag=1_multi=12.0000_len=19308	19308	No	NA	Low-quality	5.44	0.993	0.503868	0.059502	Yes	No	Lytic	#N/A	unknown	CEW
k141_146742_flag=1_multi=12.0000_len=11650	11650	No	NA	Low-quality	9.32	0.953	0.476949	0.075138	Yes	No	Lytic	#N/A	unknown	CEW
k141_147287_flag=1_multi=15.6758_len=15003	15003	No	NA	Low-quality	42.48	1	0.891916	0.018317	Yes	No	Lytic	#N/A	unknown	CWW
k141_147672_flag=0_multi=25.0150_len=12023	12023	No	NA	Low-quality	10.13	1	0.973378	0.010178	Yes	Yes	Lytic	#N/A	Straboviridae	CWW
k141_148627_flag=1_multi=8.0000_len=13878	13878	No	NA	Low-quality	9.02	0.853	0.984412	0.008611	No	Yes	Lytic	#N/A	Straboviridae	CWW
k141_14932_flag=0_multi=19.6107_len=65780	65780	No	NA	Medium-quality	81.47	0.987	0.453432	0.082597	Yes	No	Temperate	#N/A	unknown	CWW
k141_150807_flag=1_multi=49.0000_len=36719	36719	No	NA	Complete	100	1	0.454278	0.082389	Yes	No	Lytic	#N/A	Mesyanzhinovviridae	CEW
k141_150914_flag=0_multi=14.1325_len=52355	52355	No	NA	Low-quality	35.25	0.973	0.731249	0.03044	Yes	No	Lytic	#N/A	unknown	CEW
k141_151127_flag=0_multi=15.8315_len=60522	60522	No	NA	Low-quality	32.05	1	0.994967	0.006099	Yes	Yes	Lytic	Myoviridae	Kyanoviridae	CES7
k141_151552_flag=0_multi=27.5803_len=21327	21327	No	NA	Low-quality	11.98	1	0.997129	0.005155	Yes	Yes	Lytic	#N/A	Kyanoviridae	CEW
k141_153142_flag=0_multi=17.9168_len=35477	35477	No	NA	Medium-quality	57.76	1	0.960887	0.012237	Yes	Yes	Lytic	#N/A	unknown	CEW
k141_154291_flag=0_multi=10.8879_len=11011	11011	No	NA	Low-quality	0.89	0	0.973065	0.010197	No	Yes	Lytic	#N/A	unknown	CWW
k141_155220_flag=1_multi=9.7899_len=14904	14904	No	NA	Low-quality	8.77	1	0.99973	0.002266	Yes	Yes	Lytic	Myoviridae	Kyanoviridae	CEW
k141_156786_flag=0_multi=8.9976_len=17081	17081	No	NA	Low-quality	44.33	1	0.950554	0.01354	Yes	Yes	Lytic	#N/A	unknown	CEW
k141_15698_flag=1_multi=15.9773_len=14710	14710	No	NA	High-quality	100	1	0.6428	0.037729	Yes	No	Lytic	#N/A	unknown	CEW
k141_157025_flag=1_multi=10.0000_len=14974	14974	No	NA	Medium-quality	60.95	0.947	0.957323	0.012784	Yes	Yes	Lytic	#N/A	unknown	CWW
k141_159044_flag=1_multi=32.4408_len=15419	15419	No	NA	Low-quality	37.8	0.993	0.412072	0.093379	Yes	No	Temperate	#N/A	unknown	CEW
k141_160370_flag=1_multi=11.0000_len=11204	11204	No	NA	Low-quality	13.48	1	0.10743	0.185343	Yes	No	Lytic	#N/A	Drexlerviridae	CEW
k141_160517_flag=1_multi=12.4284_len=12803	12803	No	NA	Low-quality	13.86	1	0.998337	0.0044	Yes	Yes	Lytic	#N/A	Autographiviridae	CWS5
k141_160911_flag=1_multi=13.4889_len=17388	17388	No	NA	Low-quality	11.01	0.933	0.908383	0.017109	Yes	Yes	Lytic	#N/A	unknown	CEW
k141_162797_flag=1_multi=13.0000_len=13750	13750	No	NA	Low-quality	10.13	0.96	0.606122	0.041638	Yes	No	Lytic	#N/A	unknown	CEW
k141_162907_flag=1_multi=9.0000_len=10072	10072	No	NA	Low-quality	15.23	0	0.989977	0.007402	No	Yes	Lytic	#N/A	unknown	CEW
k141_164791_flag=0_multi=11.4280_len=13656	13656	No	NA	Low-quality	22.26	0.927	0.851984	0.021376	Yes	No	Lytic	#N/A	unknown	CES5
k141_165673_flag=0_multi=9.0979_len=11854	11854	No	NA	Low-quality	7.15	1	0.989118	0.007572	Yes	Yes	Lytic	#N/A	Autographiviridae	CEW
k141_16637_flag=0_multi=16.9281_len=10383	10383	No	NA	Low-quality	16.77	1	0.994366	0.006269	Yes	Yes	Lytic	#N/A	unknown	CEW
k141_166609_flag=1_multi=16.7084_len=49908	49908	No	NA	Low-quality	48.62	0.993	0.570648	0.045585	Yes	No	Lytic	#N/A	unknown	CES9
k141_167337_flag=0_multi=16.5200_len=28478	28478	No	NA	Low-quality	25.82	0.993	0.998878	0.003758	Yes	Yes	Lytic	#N/A	Kyanoviridae	CWW
k141_168002_flag=0_multi=52.9983_len=63150	63150	No	NA	Low-quality	30.68	1	0.886327	0.018827	Yes	No	Lytic	#N/A	unknown	CWW
k141_169983_flag=0_multi=14.9823_len=17530	17530	No	NA	Low-quality	46.72	1	0.272067	0.126671	Yes	No	Lytic	#N/A	unknown	CEW
k141_17082_flag=0_multi=9.9910_len=22121	22121	No	NA	Low-quality	11.22	0.947	0.999823	0.002002	Yes	Yes	Lytic	#N/A	Kyanoviridae	CWW
k141_17104_flag=0_multi=8.9957_len=40872	40872	No	NA	Low-quality	17.99	1	0.971748	0.010537	Yes	Yes	Lytic	Myoviridae	Kyanoviridae	CEW
k141_171437_flag=0_multi=12.3964_len=35315	35315	No	NA	Low-quality	37.98	1	0.977076	0.00965	Yes	Yes	Lytic	#N/A	unknown	CWW
k141_171475_flag=0_multi=9.4870_len=16196	16196	No	NA	Low-quality	15.86	1	0.998404	0.004268	Yes	Yes	Lytic	#N/A	Orlajensenviridae	CWW
k141_172476_flag=0_multi=11.9838_len=15071	15071	No	NA	Medium-quality	85.45	0.547	0.99994	0.001246	No	Yes	Lytic	#N/A	unknown	CWW
k141_173717_flag=1_multi=9.0000_len=10798	10798	No	NA	Low-quality	5.11	0.6	0.992747	0.006779	No	Yes	Lytic	#N/A	unknown	CWW
k141_174018_flag=0_multi=20.9953_len=94061	94061	No	NA	High-quality	100	0.993	0.940482	0.014805	Yes	Yes	Lytic	#N/A	Drexlerviridae	CEW
k141_174181_flag=1_multi=7.9274_len=18273	18273	No	NA	Low-quality	5.15	0.92	0.892284	0.018298	Yes	No	Lytic	#N/A	Straboviridae	CWW
k141_174810_flag=1_multi=13.0000_len=31232	31232	No	NA	Low-quality	43.35	1	0.826294	0.023265	Yes	No	Lytic	#N/A	unknown	CES6
k141_1751_flag=3_multi=27.0000_len=11291	11291	No	NA	Not-determined	NA	0.593	0.999576	0.002738	No	Yes	Temperate	#N/A	unknown	CWW
k141_175356_flag=1_multi=9.0000_len=14295	14295	No	NA	Low-quality	12.93	0.947	0.837116	0.022528	Yes	No	Lytic	#N/A	unknown	CWW
k141_175369_flag=1_multi=9.0000_len=12707	12707	No	NA	Low-quality	7.03	1	0.822615	0.02351	Yes	No	Lytic	#N/A	Kyanoviridae	CWW
k141_176271_flag=0_multi=11.7581_len=27500	27500	No	NA	Low-quality	47.09	1	0.980723	0.009215	Yes	Yes	Lytic	#N/A	unknown	CEW
k141_176435_flag=1_multi=11.9683_len=10535	10535	No	NA	Low-quality	30.4	1	0.995205	0.006005	Yes	Yes	Lytic	#N/A	unknown	CEW
k141_178421_flag=0_multi=19.0000_len=10138	10138	No	NA	Low-quality	5.62	0.88	0.934654	0.015182	No	Yes	Lytic	Myoviridae	Kyanoviridae	CWW
k141_180042_flag=0_multi=13.0864_len=20539	20539	No	NA	Medium-quality	58.94	1	0.942427	0.014521	Yes	Yes	Lytic	#N/A	Peduoviridae	CEW
k141_180680_flag=1_multi=8.9850_len=11839	11839	No	NA	Low-quality	29.14	0.88	0.987916	0.007856	No	Yes	Lytic	#N/A	unknown	CWW
k141_181204_flag=1_multi=11.4223_len=14131	14131	No	NA	Low-quality	10.01	0.873	0.99625	0.005684	No	Yes	Lytic	#N/A	unknown	CWW
k141_181823_flag=0_multi=9.5774_len=11950	11950	No	NA	Low-quality	1.14	0.893	0.976044	0.009763	No	Yes	Lytic	#N/A	unknown	CWW
k141_182236_flag=0_multi=14.8754_len=15941	15941	No	NA	Low-quality	11.52	0.953	0.952208	0.013351	Yes	Yes	Lytic	#N/A	unknown	CEW
k141_182675_flag=0_multi=14.0601_len=14394	14394	No	NA	Low-quality	19.98	0.98	0.963518	0.011821	Yes	Yes	Lytic	#N/A	unknown	CWW
k141_182961_flag=0_multi=27.8580_len=11742	11742	No	NA	Low-quality	8.11	1	0.959817	0.012388	Yes	Yes	Lytic	#N/A	Straboviridae	CEW
k141_186166_flag=1_multi=29.0000_len=36805	36805	No	NA	High-quality	96.18	1	0.454278	0.082389	Yes	No	Lytic	#N/A	Mesyanzhinovviridae	CWW
k141_186844_flag=0_multi=12.8732_len=14105	14105	No	NA	Low-quality	6.35	0.987	0.761774	0.028571	Yes	No	Lytic	#N/A	unknown	CEW
k141_187654_flag=1_multi=8.9940_len=14733	14733	No	NA	Low-quality	15.29	0.993	0.929132	0.015636	Yes	Yes	Lytic	#N/A	Peduoviridae	CWW
k141_190407_flag=0_multi=12.9818_len=14611	14611	No	NA	Low-quality	7.89	0.967	0.813301	0.024171	Yes	No	Lytic	#N/A	unknown	CWW
k141_190713_flag=1_multi=10.0000_len=10799	10799	No	NA	Low-quality	17.24	0.893	0.997029	0.005287	No	Yes	Lytic	#N/A	Autographiviridae	CWW
k141_192452_flag=0_multi=66.1238_len=30703	30703	No	NA	Low-quality	27.38	1	0.792891	0.025946	Yes	No	Lytic	#N/A	Mesyanzhinovviridae	CES9
k141_193835_flag=1_multi=11.0000_len=28065	28065	No	NA	Medium-quality	75.28	1	1	0	Yes	Yes	Lytic	#N/A	Kyanoviridae	CWW
k141_195461_flag=0_multi=9.8244_len=10967	10967	No	NA	Medium-quality	52.45	1	0.879036	0.019337	Yes	No	Lytic	#N/A	Casjensviridae	CWW
k141_196430_flag=0_multi=7.3584_len=12634	12634	No	NA	Low-quality	7.63	0.993	0.999852	0.001907	Yes	Yes	Lytic	#N/A	Kyanoviridae	CWW
k141_199111_flag=0_multi=10.9828_len=12942	12942	No	NA	Low-quality	38.66	1	0.474594	0.075931	Yes	No	Lytic	#N/A	Peduoviridae	CWW
k141_199323_flag=1_multi=8.8362_len=10167	10167	No	NA	Low-quality	27.19	0.993	0.999816	0.002002	Yes	Yes	Lytic	#N/A	unknown	CWW
k141_199780_flag=0_multi=14.9911_len=34886	34886	No	NA	Low-quality	45.87	0.98	0.987506	0.007912	Yes	Yes	Temperate	#N/A	unknown	CWW
k141_201614_flag=0_multi=7.9838_len=13496	13496	No	NA	Low-quality	34.05	1	0.791051	0.026078	Yes	No	Lytic	#N/A	Mesyanzhinovviridae	CWW
k141_201848_flag=0_multi=7.1948_len=15215	15215	No	NA	Medium-quality	51.87	1	0.999766	0.002115	Yes	Yes	Lytic	#N/A	unknown	CWW
k141_202113_flag=0_multi=29.9558_len=14560	14560	No	NA	Low-quality	22.51	0.913	0.997411	0.005042	Yes	Yes	Lytic	#N/A	unknown	CEW
k141_203622_flag=0_multi=10.9928_len=10810	10810	No	NA	Low-quality	6.75	1	0.927145	0.015843	Yes	Yes	Lytic	#N/A	Kyanoviridae	CEW
k141_203730_flag=0_multi=14.8580_len=27726	27726	No	NA	Low-quality	16.68	1	0.992059	0.006911	Yes	Yes	Lytic	#N/A	Kyanoviridae	CWW
k141_204095_flag=0_multi=18.9625_len=10689	10689	No	NA	Low-quality	10.77	0.987	0.763065	0.028476	Yes	No	Lytic	#N/A	Demerecviridae	CWW
k141_205351_flag=0_multi=10.6122_len=16470	16470	No	NA	Medium-quality	50.89	1	0.998173	0.004475	Yes	Yes	Lytic	#N/A	unknown	CEW
k141_205703_flag=0_multi=11.9472_len=11592	11592	No	NA	Low-quality	30.8	0.987	0.999879	0.001775	Yes	Yes	Lytic	#N/A	Kyanoviridae	CWW
k141_20575_flag=0_multi=12.0502_len=12255	12255	No	NA	Low-quality	19.45	1	0.999931	0.001379	Yes	Yes	Lytic	#N/A	Autographiviridae	CWW
k141_205995_flag=0_multi=17.8641_len=15614	15614	No	NA	Low-quality	1.84	0.953	0.462905	0.080123	Yes	No	Lytic	#N/A	unknown	CWW
k141_207607_flag=0_multi=20.9136_len=25304	25304	No	NA	Medium-quality	66.93	0.987	0.156877	0.162002	Yes	No	Lytic	#N/A	unknown	CWW
k141_208915_flag=1_multi=15.9942_len=56617	56617	No	NA	Low-quality	26.73	0.993	0.934755	0.015182	Yes	Yes	Lytic	#N/A	Straboviridae	CEW
k141_209407_flag=0_multi=10.0000_len=15898	15898	No	NA	Low-quality	46.93	1	0.809496	0.024473	Yes	No	Lytic	#N/A	unknown	CWW
k141_210534_flag=0_multi=10.9691_len=25064	25064	No	NA	Medium-quality	57.8	0.993	0.999387	0.003021	Yes	Yes	Lytic	#N/A	Autographiviridae	CEW
k141_215032_flag=0_multi=20.0000_len=10374	10374	No	NA	Low-quality	6.03	0.933	0.868356	0.020243	Yes	No	Lytic	#N/A	Kyanoviridae	CEW
k141_215197_flag=0_multi=12.7482_len=23654	23654	No	NA	Low-quality	13.08	0.96	0.676354	0.035086	Yes	No	Lytic	#N/A	unknown	CES8
k141_215461_flag=1_multi=10.0000_len=12384	12384	No	NA	Low-quality	30.69	0.993	0.99986	0.001907	Yes	Yes	Lytic	#N/A	unknown	CEW
k141_21640_flag=1_multi=7.0000_len=13548	13548	No	NA	Low-quality	9.79	0.993	0.981529	0.009083	Yes	Yes	Lytic	#N/A	Straboviridae	CEW
k141_218827_flag=1_multi=10.7456_len=17626	17626	No	NA	Low-quality	16.3	0.78	0.999973	0.000888	No	Yes	Lytic	#N/A	unknown	CWW
k141_220517_flag=0_multi=11.5768_len=11198	11198	No	NA	Low-quality	12.04	1	0.792064	0.025984	Yes	No	Lytic	#N/A	unknown	CEW
k141_220871_flag=0_multi=9.8235_len=13466	13466	No	NA	Low-quality	8.82	1	0.936364	0.015012	Yes	Yes	Lytic	#N/A	Kyanoviridae	CWW
k141_221075_flag=1_multi=10.7303_len=11044	11044	No	NA	Low-quality	11.04	1	0.925563	0.0159	Yes	Yes	Lytic	#N/A	Demerecviridae	CWW
k141_22303_flag=1_multi=12.8790_len=17797	17797	No	NA	Low-quality	9.84	0.973	0.900525	0.017656	Yes	Yes	Lytic	#N/A	unknown	CES8
k141_225298_flag=0_multi=10.5517_len=13866	13866	No	NA	Low-quality	9.17	0.853	0.998521	0.00423	No	Yes	Lytic	#N/A	Ackermannviridae	CWW
k141_225318_flag=0_multi=10.9339_len=13765	13765	No	NA	Low-quality	3.22	0	0.916495	0.016504	No	Yes	Lytic	#N/A	unknown	CWW
k141_225614_flag=1_multi=12.0000_len=30625	30625	No	NA	Not-determined	NA	0	0.982019	0.009007	No	Yes	Lytic	#N/A	unknown	CEW
k141_226245_flag=1_multi=9.7034_len=14162	14162	No	NA	Low-quality	4.08	1	0.976207	0.009763	Yes	Yes	Lytic	Myoviridae	Kyanoviridae	CEW
k141_226357_flag=1_multi=15.0000_len=13168	13168	No	NA	Low-quality	37.49	0.987	0.550466	0.048682	Yes	No	Lytic	#N/A	unknown	CEW
k141_227187_flag=0_multi=21.7049_len=27624	27624	Yes	24250	Low-quality	15.94	0.993	0.472217	0.076649	Yes	No	Temperate	#N/A	Straboviridae	CWW
k141_227746_flag=1_multi=14.0000_len=11319	11319	No	NA	Not-determined	NA	0	0.961767	0.012086	No	Yes	Lytic	#N/A	Schitoviridae	CWS4
k141_228219_flag=1_multi=8.8714_len=11078	11078	No	NA	Low-quality	6.48	0.853	0.996238	0.005684	No	Yes	Lytic	#N/A	Kyanoviridae	CEW
k141_228817_flag=1_multi=41.9900_len=37839	37839	No	NA	Medium-quality	69.65	1	0.981401	0.009083	Yes	Yes	Lytic	#N/A	Drexlerviridae	CEW
k141_230928_flag=0_multi=9.7556_len=13543	13543	No	NA	Low-quality	7.55	1	0.988782	0.007648	Yes	Yes	Lytic	#N/A	Kyanoviridae	CWW
k141_233455_flag=0_multi=15.1703_len=15838	15838	No	NA	Low-quality	42.14	0.987	0.912504	0.016844	Yes	Yes	Lytic	#N/A	Peduoviridae	CES1
k141_233484_flag=1_multi=11.0000_len=12101	12101	No	NA	Low-quality	1.91	0.56	0.985645	0.008441	No	Yes	Lytic	#N/A	Herelleviridae	CWW
k141_233978_flag=0_multi=20.9167_len=10758	10758	No	NA	Low-quality	5.49	1	0.893279	0.01826	Yes	No	Lytic	#N/A	unknown	CWW
k141_234659_flag=0_multi=13.9968_len=90317	90317	No	NA	Not-determined	NA	0	0.942018	0.014559	No	Yes	Lytic	#N/A	Kyanoviridae	CEW
k141_234987_flag=1_multi=15.4616_len=13595	13595	No	NA	Low-quality	9.54	1	0.746671	0.029345	Yes	No	Lytic	#N/A	unknown	CWW
k141_236511_flag=0_multi=10.9657_len=12963	12963	No	NA	Low-quality	10.34	1	0.987048	0.008044	Yes	Yes	Lytic	#N/A	unknown	CEW
k141_238163_flag=0_multi=6.0000_len=10145	10145	No	NA	Low-quality	4.95	0.973	0.915607	0.016561	Yes	Yes	Lytic	#N/A	unknown	CEW
k141_238235_flag=1_multi=7.0000_len=13690	13690	No	NA	Low-quality	7.48	1	0.873413	0.019866	Yes	No	Lytic	Myoviridae	Kyanoviridae	CEW
k141_239548_flag=0_multi=8.0000_len=11880	11880	No	NA	Not-determined	NA	0	0.903585	0.017467	No	Yes	Lytic	#N/A	unknown	CES9
k141_240911_flag=0_multi=29.3025_len=16969	16969	No	NA	Medium-quality	82.34	1	0.964553	0.011632	Yes	Yes	Lytic	#N/A	Drexlerviridae	CEW
k141_241325_flag=0_multi=8.4630_len=11693	11693	No	NA	Low-quality	28.16	0.84	1	0	No	Yes	Lytic	#N/A	unknown	CWW
k141_242486_flag=0_multi=16.0617_len=79810	79810	No	NA	Low-quality	44.81	0.987	0.915463	0.01658	Yes	Yes	Lytic	#N/A	Kyanoviridae	CEW
k141_243860_flag=1_multi=8.3569_len=13738	13738	No	NA	Low-quality	10.41	0.94	0.935347	0.015164	Yes	Yes	Lytic	#N/A	unknown	CWW
k141_24506_flag=0_multi=12.0000_len=19333	19333	No	NA	Low-quality	28.51	1	0.153878	0.163135	Yes	No	Lytic	#N/A	unknown	CEW
k141_246248_flag=0_multi=6.6298_len=11423	11423	No	NA	Low-quality	6.2	0.76	0.999922	0.001492	No	Yes	Lytic	#N/A	unknown	CEW
k141_246525_flag=0_multi=33.4894_len=37255	37255	No	NA	Low-quality	19.46	0.993	0.996979	0.005306	Yes	Yes	Lytic	Myoviridae	Kyanoviridae	CWW
k141_247140_flag=0_multi=32.6491_len=39962	39962	Yes	37923	Low-quality	15.69	0.893	0.987233	0.008007	No	Yes	Temperate	Myoviridae	Kyanoviridae	CEW
k141_248372_flag=0_multi=10.8167_len=14455	14455	No	NA	Low-quality	8.38	0.78	0.939024	0.014899	No	Yes	Lytic	#N/A	Straboviridae	CEW
k141_248502_flag=0_multi=9.5243_len=10709	10709	No	NA	Low-quality	9.95	1	0.998916	0.003739	Yes	Yes	Lytic	#N/A	unknown	CEW
k141_249092_flag=1_multi=11.0000_len=15818	15818	No	NA	Low-quality	26.56	0.78	0.99669	0.005438	No	Yes	Lytic	#N/A	unknown	CWW
k141_249345_flag=0_multi=13.0000_len=17301	17301	No	NA	Medium-quality	50.63	1	0.889204	0.018563	Yes	No	Lytic	#N/A	unknown	CEW
k141_249942_flag=0_multi=62.8985_len=26817	26817	No	NA	Low-quality	16.9	0.967	0.864759	0.020545	Yes	No	Lytic	#N/A	Drexlerviridae	CEW
k141_250392_flag=1_multi=11.0000_len=18434	18434	No	NA	Low-quality	41.96	1	0.808968	0.024549	Yes	No	Lytic	#N/A	unknown	CEW
k141_250857_flag=0_multi=14.4068_len=12311	12311	No	NA	Low-quality	36.34	1	0.056247	0.227019	Yes	No	Lytic	#N/A	unknown	CEW
k141_252878_flag=0_multi=45.9444_len=11520	11520	No	NA	Low-quality	24.88	1	0.263683	0.128635	Yes	No	Lytic	#N/A	unknown	CES9
k141_252948_flag=1_multi=10.0000_len=14131	14131	No	NA	Low-quality	3.05	0	0.949347	0.013728	No	Yes	Lytic	Phycodnaviridae	Ackermannviridae	CWW
k141_253406_flag=0_multi=8.9873_len=13957	13957	No	NA	Low-quality	7.32	0.953	0.623347	0.03975	Yes	No	Lytic	#N/A	Demerecviridae	CEW
k141_253490_flag=1_multi=11.9943_len=12297	12297	No	NA	Low-quality	9.04	1	0.384072	0.100253	Yes	No	Lytic	#N/A	unknown	CEW
k141_254264_flag=0_multi=22.0000_len=20707	20707	No	NA	Medium-quality	57.33	0.993	0.747801	0.029326	Yes	No	Lytic	#N/A	Peduoviridae	CWW
k141_255454_flag=0_multi=15.1153_len=29906	29906	No	NA	Low-quality	17.86	1	0.488028	0.070304	Yes	No	Lytic	Myoviridae	Kyanoviridae	CWW
k141_255842_flag=1_multi=9.8128_len=10285	10285	No	NA	Low-quality	5.36	0.867	0.989521	0.007516	No	Yes	Lytic	#N/A	Kyanoviridae	CWW
k141_256463_flag=1_multi=12.0000_len=42683	42683	No	NA	High-quality	94.78	1	0.987212	0.008007	Yes	Yes	Temperate	Autographiviridae	Autographiviridae	CEW
k141_257_flag=1_multi=6.7184_len=11984	11984	No	NA	Not-determined	NA	0.993	0.997847	0.004721	Yes	Yes	Lytic	#N/A	unknown	CEW
k141_25763_flag=1_multi=14.0000_len=15921	15921	No	NA	Low-quality	14.92	0.993	0.922699	0.01607	Yes	Yes	Lytic	Demerecviridae	Demerecviridae	CWW
k141_257809_flag=1_multi=11.0000_len=19220	19220	No	NA	Low-quality	33.86	0.98	0.936369	0.015012	Yes	Yes	Lytic	#N/A	unknown	CES5
k141_259491_flag=0_multi=16.9038_len=14951	14951	No	NA	Low-quality	36.08	1	0.996527	0.005514	Yes	Yes	Lytic	#N/A	unknown	CEW
k141_260179_flag=1_multi=9.0000_len=10669	10669	No	NA	Low-quality	6.7	0.993	0.791911	0.026003	Yes	No	Lytic	#N/A	Straboviridae	CWW
k141_2604_flag=0_multi=12.5357_len=11439	11439	No	NA	Not-determined	NA	0	0.978426	0.009517	No	Yes	Lytic	#N/A	unknown	CWS9
k141_260401_flag=1_multi=9.0000_len=14924	14924	No	NA	Low-quality	10.31	0.993	0.808884	0.024586	Yes	No	Lytic	#N/A	unknown	CEW
k141_262286_flag=0_multi=14.3692_len=22573	22573	No	NA	Medium-quality	64.62	1	0.38293	0.100574	Yes	No	Lytic	#N/A	Straboviridae	CEW
k141_262464_flag=0_multi=17.2718_len=13976	13976	No	NA	Low-quality	6.18	1	0.999999	0.000397	Yes	Yes	Lytic	Myoviridae	Kyanoviridae	CES8
k141_263057_flag=0_multi=29.9171_len=67287	67287	No	NA	Medium-quality	61.12	0.867	0.963245	0.011878	No	Yes	Lytic	#N/A	unknown	CWS9
k141_263452_flag=0_multi=12.1084_len=29785	29785	No	NA	Low-quality	27.16	0.987	0.966423	0.011481	Yes	Yes	Lytic	#N/A	Kyanoviridae	CEW
k141_26351_flag=1_multi=13.8827_len=26015	26015	No	NA	Medium-quality	79.83	0.993	0.988105	0.007856	Yes	Yes	Lytic	#N/A	Peduoviridae	CEW
k141_266154_flag=1_multi=12.1835_len=13395	13395	No	NA	Low-quality	45.61	1	0.992764	0.006779	Yes	Yes	Lytic	#N/A	unknown	CEW
k141_266540_flag=1_multi=10.4045_len=14203	14203	No	NA	Low-quality	4.84	0.9	0.999986	0.000793	No	Yes	Lytic	#N/A	unknown	CWW
k141_266880_flag=1_multi=7.0000_len=10454	10454	No	NA	Low-quality	5.85	0.993	0.414505	0.092926	Yes	No	Lytic	Myoviridae	Kyanoviridae	CEW
k141_26689_flag=1_multi=11.0000_len=26974	26974	No	NA	Medium-quality	61.34	0.98	0.701197	0.032876	Yes	No	Lytic	#N/A	Casjensviridae	CWW
k141_268337_flag=0_multi=8.9811_len=10278	10278	No	NA	Low-quality	4.47	0.94	0.314991	0.115511	Yes	No	Lytic	#N/A	unknown	CEW
k141_270533_flag=0_multi=16.9503_len=14303	14303	No	NA	Low-quality	36.05	1	0.983908	0.008724	Yes	Yes	Temperate	#N/A	Autographiviridae	CWW
k141_270915_flag=0_multi=9.9829_len=11728	11728	No	NA	Low-quality	29.41	0.973	0.999997	0.000491	Yes	Yes	Temperate	#N/A	Autographiviridae	CWW
k141_273600_flag=0_multi=11.7747_len=15806	15806	No	NA	High-quality	98.31	1	0.886952	0.01877	Yes	No	Lytic	#N/A	Casjensviridae	CEW
k141_273989_flag=1_multi=13.0000_len=14083	14083	No	NA	Low-quality	19.31	0.993	0.772057	0.027589	Yes	No	Lytic	#N/A	unknown	CWW
k141_274558_flag=0_multi=26.8130_len=52402	52402	No	NA	Complete	100	0.993	0.955048	0.013011	Yes	Yes	Lytic	#N/A	Mesyanzhinovviridae	CEW
k141_276493_flag=1_multi=10.6213_len=11220	11220	No	NA	Low-quality	35.48	1	0.999868	0.001813	Yes	Yes	Lytic	Siphoviridae	unknown	CWW
k141_277085_flag=0_multi=13.0000_len=19485	19485	No	NA	Low-quality	25.34	0.807	1	0.000264	No	Yes	Temperate	#N/A	Zobellviridae	CWW
k141_277201_flag=0_multi=8.9845_len=11467	11467	No	NA	Low-quality	6.3	1	0.999639	0.002493	Yes	Yes	Lytic	Myoviridae	Kyanoviridae	CEW
k141_277305_flag=1_multi=7.0000_len=10124	10124	No	NA	Not-determined	NA	0.967	0.531227	0.052232	Yes	No	Lytic	#N/A	unknown	CES5
k141_2781_flag=0_multi=9.3335_len=16232	16232	No	NA	Medium-quality	55.51	1	0.999554	0.002776	Yes	Yes	Lytic	#N/A	unknown	CWW
k141_278399_flag=1_multi=14.0000_len=15134	15134	No	NA	Low-quality	8.54	0.7	0.999783	0.002058	No	Yes	Lytic	#N/A	unknown	CEW
k141_279437_flag=1_multi=10.5806_len=13184	13184	No	NA	Low-quality	12.21	0.94	0.988461	0.00778	Yes	Yes	Lytic	#N/A	Straboviridae	CWW
k141_279485_flag=1_multi=16.0000_len=14835	14835	No	NA	Low-quality	14.05	0.96	0.545577	0.049702	Yes	No	Lytic	#N/A	Demerecviridae	CWW
k141_280009_flag=0_multi=18.9756_len=32600	32600	No	NA	Medium-quality	76.13	1	0.949019	0.013823	Yes	Yes	Lytic	#N/A	Autographiviridae	CEW
k141_281158_flag=0_multi=31.8777_len=11297	11297	No	NA	Low-quality	4.08	0.793	0.935849	0.015069	No	Yes	Lytic	#N/A	unknown	CWW
k141_282096_flag=0_multi=12.4637_len=63978	63978	No	NA	Low-quality	35.86	0.993	0.95362	0.0132	Yes	Yes	Lytic	#N/A	Kyanoviridae	CWW
k141_282967_flag=0_multi=16.0000_len=46355	46355	No	NA	Low-quality	21.99	0.987	0.984611	0.008592	Yes	Yes	Lytic	#N/A	Straboviridae	CEW
k141_288812_flag=1_multi=9.1954_len=16914	16914	No	NA	Low-quality	5.64	1	0.999827	0.001983	Yes	Yes	Lytic	#N/A	Kyanoviridae	CWW
k141_289736_flag=0_multi=9.9933_len=29488	29488	No	NA	Medium-quality	78.59	1	0.577682	0.044754	Yes	No	Temperate	#N/A	unknown	CEW
k141_29116_flag=0_multi=6.9309_len=12347	12347	Yes	8165	Low-quality	7.77	0	0.936458	0.015012	No	Yes	Temperate	#N/A	unknown	CWW
k141_291466_flag=0_multi=33.6237_len=12050	12050	No	NA	Low-quality	25.22	1	0.609432	0.04128	Yes	No	Lytic	#N/A	Drexlerviridae	CEW
k141_292078_flag=0_multi=24.4411_len=14853	14853	No	NA	Low-quality	4.33	0.973	0.823826	0.023416	Yes	No	Lytic	#N/A	unknown	CWW
k141_293008_flag=1_multi=12.9359_len=22219	22219	No	NA	Low-quality	10.47	0.993	0.963612	0.011802	Yes	Yes	Lytic	#N/A	Demerecviridae	CWW
k141_294125_flag=1_multi=10.6654_len=10374	10374	No	NA	Low-quality	25.81	0.753	0.999811	0.002021	No	Yes	Lytic	Podoviridae	unknown	CWW
k141_294374_flag=0_multi=16.0000_len=15359	15359	No	NA	Low-quality	15.75	1	0.997863	0.004702	Yes	Yes	Lytic	#N/A	unknown	CWW
k141_301220_flag=1_multi=17.0000_len=34119	34119	No	NA	Medium-quality	87.74	1	0.786658	0.02638	Yes	No	Lytic	#N/A	Peduoviridae	CEW
k141_301222_flag=0_multi=25.7929_len=14994	14994	No	NA	Low-quality	9.29	1	0.974991	0.009914	Yes	Yes	Lytic	#N/A	Kyanoviridae	CEW
k141_302581_flag=0_multi=7.7372_len=12186	12186	No	NA	Low-quality	11.28	0.847	0.999986	0.000774	No	Yes	Lytic	#N/A	Kyanoviridae	CEW
k141_30304_flag=0_multi=18.4617_len=13657	13657	No	NA	Low-quality	7.61	1	0.977573	0.009574	Yes	Yes	Lytic	#N/A	Kyanoviridae	CEW
k141_303183_flag=0_multi=12.9842_len=16899	16899	No	NA	Low-quality	11.8	0.773	0.988919	0.007648	No	Yes	Lytic	#N/A	Straboviridae	CEW
k141_303256_flag=0_multi=12.0000_len=14543	14543	No	NA	Low-quality	10.04	0.987	0.979089	0.009423	Yes	Yes	Lytic	#N/A	unknown	CEW
k141_304155_flag=0_multi=15.8565_len=11164	11164	No	NA	Low-quality	27.06	0.993	0.681387	0.034727	Yes	No	Lytic	Siphoviridae	unknown	CWW
k141_305412_flag=1_multi=10.0000_len=13677	13677	No	NA	Low-quality	8.09	0.953	0.285945	0.123083	Yes	No	Lytic	#N/A	unknown	CWW
k141_306737_flag=1_multi=9.0000_len=14291	14291	No	NA	Low-quality	23.78	0.987	0.643481	0.037635	Yes	No	Lytic	#N/A	Mesyanzhinovviridae	CEW
k141_306773_flag=1_multi=10.0000_len=14891	14891	No	NA	Low-quality	16.7	1	0.998658	0.004079	Yes	Yes	Lytic	#N/A	unknown	CES8
k141_307036_flag=0_multi=17.5510_len=12272	12272	No	NA	Low-quality	35.11	1	0.999627	0.002568	Yes	Yes	Lytic	#N/A	unknown	CEW
k141_307162_flag=1_multi=12.0000_len=36501	36501	No	NA	Low-quality	38.14	1	0.954806	0.013049	Yes	Yes	Lytic	#N/A	unknown	CWS3
k141_307267_flag=0_multi=22.4719_len=16236	16236	No	NA	Low-quality	10.04	0.96	0.693488	0.033632	Yes	No	Lytic	#N/A	unknown	CWW
k141_30856_flag=0_multi=9.0412_len=19958	19958	No	NA	Low-quality	18.5	1	0.997274	0.00508	Yes	Yes	Lytic	#N/A	Kyanoviridae	CEW
k141_309723_flag=0_multi=26.3207_len=20197	20197	No	NA	Complete	100	0.967	0.999945	0.00119	Yes	Yes	Temperate	#N/A	unknown	CWW
k141_310184_flag=0_multi=18.7138_len=17787	17787	No	NA	Low-quality	9.98	0.967	0.966195	0.0115	Yes	Yes	Lytic	#N/A	Kyanoviridae	CEW
k141_310481_flag=0_multi=13.6649_len=25059	25059	No	NA	Low-quality	26.98	1	0.982471	0.008951	Yes	Yes	Lytic	#N/A	unknown	CWW
k141_310491_flag=1_multi=14.0000_len=41796	41796	No	NA	Low-quality	39.69	1	0.809556	0.024473	Yes	No	Lytic	#N/A	Mesyanzhinovviridae	CWS6
k141_312170_flag=1_multi=10.4180_len=10585	10585	No	NA	Low-quality	2.92	0.893	0.989971	0.007421	No	Yes	Lytic	#N/A	Kyanoviridae	CEW
k141_3122_flag=1_multi=8.8479_len=12297	12297	No	NA	Low-quality	15.81	0.953	0.831279	0.022906	Yes	No	Temperate	#N/A	unknown	CWW
k141_312303_flag=0_multi=30.6290_len=12832	12832	No	NA	Low-quality	4.91	0.993	0.999514	0.002908	Yes	Yes	Lytic	Myoviridae	Kyanoviridae	CWW
k141_314588_flag=0_multi=11.9833_len=14639	14639	No	NA	Low-quality	10.11	1	0.920984	0.016278	Yes	Yes	Lytic	#N/A	Drexlerviridae	CEW
k141_315645_flag=1_multi=11.0000_len=28692	28692	No	NA	Not-determined	NA	0	0.918907	0.016429	No	Yes	Lytic	#N/A	unknown	CWW
k141_316278_flag=1_multi=16.0000_len=84211	84211	No	NA	High-quality	94.2	1	0.999945	0.001171	Yes	Yes	Lytic	#N/A	Guelinviridae	CES9
k141_316670_flag=0_multi=13.0000_len=10378	10378	No	NA	Low-quality	3.53	0.76	0.999998	0.000434	No	Yes	Lytic	#N/A	unknown	CWW
k141_318908_flag=0_multi=22.4963_len=10163	10163	No	NA	Low-quality	16.47	1	0.992029	0.006911	Yes	Yes	Lytic	#N/A	Autographiviridae	CWW
k141_323172_flag=1_multi=8.5272_len=15384	15384	No	NA	Low-quality	44.55	0.947	0.130995	0.17337	Yes	No	Lytic	#N/A	Kyanoviridae	CEW
k141_323197_flag=0_multi=9.9619_len=20437	20437	No	NA	Low-quality	11.6	1	0.842135	0.022075	Yes	No	Lytic	#N/A	Kyanoviridae	CWW
k141_323951_flag=1_multi=14.0000_len=19189	19189	No	NA	Low-quality	20.77	0.993	0.989172	0.007572	Yes	Yes	Lytic	#N/A	Schitoviridae	CES7
k141_32480_flag=0_multi=16.0853_len=12193	12193	No	NA	Low-quality	36.88	1	0.995653	0.005835	Yes	Yes	Lytic	#N/A	unknown	CEW
k141_325486_flag=0_multi=13.0000_len=10083	10083	No	NA	Low-quality	5.96	1	0.850231	0.021508	Yes	No	Lytic	Myoviridae	Kyanoviridae	CEW
k141_326202_flag=1_multi=13.0000_len=17092	17092	No	NA	Low-quality	47.73	0.987	0.998644	0.004098	Yes	Yes	Lytic	#N/A	Peduoviridae	CEW
k141_326233_flag=1_multi=13.0000_len=10854	10854	No	NA	Low-quality	4.86	1	0.999978	0.00085	Yes	Yes	Lytic	Myoviridae	Kyanoviridae	CES7
k141_327399_flag=0_multi=13.0000_len=15665	15665	No	NA	Low-quality	8.96	0.987	0.771857	0.027664	Yes	No	Lytic	#N/A	Kyanoviridae	CWW
k141_327596_flag=0_multi=10.9612_len=17150	17150	No	NA	Low-quality	30.24	0.767	0.999916	0.00153	No	Yes	Lytic	#N/A	unknown	CEW
k141_327608_flag=0_multi=16.7645_len=18961	18961	No	NA	Low-quality	48.41	1	0.525054	0.053327	Yes	No	Lytic	#N/A	Mesyanzhinovviridae	CWW
k141_328114_flag=1_multi=8.0192_len=12654	12654	No	NA	Low-quality	6.9	1	0.898947	0.017713	Yes	No	Lytic	#N/A	unknown	CEW
k141_33167_flag=1_multi=10.0000_len=19883	19883	No	NA	Low-quality	46.86	0.993	0.955008	0.013011	Yes	Yes	Lytic	#N/A	unknown	CES8
k141_332511_flag=0_multi=7.8753_len=12188	12188	No	NA	Low-quality	11.36	0.993	0.937773	0.014956	Yes	Yes	Lytic	#N/A	Kyanoviridae	CWW
k141_332921_flag=0_multi=19.7633_len=70940	70940	No	NA	Low-quality	47.2	1	0.537317	0.050967	Yes	No	Lytic	#N/A	Straboviridae	CWW
k141_333327_flag=0_multi=13.1782_len=12680	12680	No	NA	Low-quality	40.26	0.987	0.999778	0.002058	Yes	Yes	Lytic	#N/A	Zierdtviridae	CEW
k141_333651_flag=0_multi=17.8009_len=12268	12268	No	NA	Low-quality	12.57	1	0.777055	0.027117	Yes	No	Lytic	#N/A	Demerecviridae	CWW
k141_335688_flag=0_multi=9.9992_len=14780	14780	No	NA	Low-quality	4.2	0.92	0.898913	0.017713	Yes	No	Lytic	#N/A	unknown	CWW
k141_337616_flag=0_multi=11.5337_len=12948	12948	No	NA	Low-quality	32.22	0.807	0.997441	0.005023	No	Yes	Lytic	#N/A	unknown	CEW
k141_33933_flag=0_multi=10.4182_len=13856	13856	No	NA	Low-quality	9.1	0.993	0.99649	0.005533	Yes	Yes	Lytic	#N/A	Straboviridae	CWW
k141_339509_flag=1_multi=10.6419_len=16925	16925	No	NA	Low-quality	18.76	0.953	0.98685	0.00812	Yes	Yes	Lytic	#N/A	unknown	CEW
k141_339720_flag=0_multi=13.1292_len=11653	11653	No	NA	Low-quality	28.31	1	0.999573	0.002757	Yes	Yes	Lytic	Podoviridae	unknown	CWW
k141_340034_flag=1_multi=11.0000_len=10846	10846	No	NA	Low-quality	9.72	0.5	0.996123	0.005722	No	Yes	Lytic	#N/A	Straboviridae	CWW
k141_340374_flag=1_multi=10.0000_len=11926	11926	No	NA	Low-quality	19.3	0.98	0.999988	0.000736	Yes	Yes	Lytic	#N/A	unknown	CEW
k141_341374_flag=0_multi=8.8092_len=13690	13690	No	NA	Low-quality	9.51	1	0.268638	0.127313	Yes	No	Lytic	#N/A	unknown	CEW
k141_343111_flag=1_multi=8.0000_len=11326	11326	No	NA	Low-quality	7.6	0.787	0.925373	0.015919	No	Yes	Lytic	#N/A	Straboviridae	CWW
k141_343334_flag=1_multi=9.0000_len=12858	12858	No	NA	Low-quality	5.89	1	0.484447	0.072022	Yes		Lytic	Myoviridae	Kyanoviridae	CWW
k141_34402_flag=0_multi=13.0000_len=18238	18238	No	NA	Low-quality	43.94	0.973	0.490895	0.068755	Yes	No	Lytic	#N/A	unknown	CWW
k141_34728_flag=1_multi=10.0000_len=11774	11774	No	NA	Low-quality	10.06	0.9	0.997414	0.005042	No	Yes	Lytic	#N/A	unknown	CWW
k141_349083_flag=0_multi=16.5023_len=15902	15902	No	NA	Low-quality	13.34	1	0.850811	0.02149	Yes	No	Lytic	#N/A	Straboviridae	CWW
k141_349152_flag=1_multi=14.9448_len=27540	27540	No	NA	High-quality	100	0.647	0.952033	0.013388	No	Yes	Lytic	#N/A	unknown	CEW
k141_349629_flag=1_multi=11.1235_len=14139	14139	No	NA	Low-quality	27.91	1	0.999608	0.002644	Yes	Yes	Lytic	#N/A	unknown	CES5
k141_351213_flag=1_multi=11.0000_len=11486	11486	No	NA	Low-quality	6.06	0	0.934266	0.015201	No	Yes	Lytic	#N/A	unknown	CWW
k141_352108_flag=0_multi=20.9717_len=15691	15691	No	NA	Low-quality	13.66	1	0.731775	0.030421	Yes	No	Lytic	#N/A	unknown	CWW
k141_352169_flag=0_multi=18.1366_len=25171	25171	No	NA	Low-quality	40.64	1	0.925178	0.015919	Yes	Yes	Lytic	#N/A	unknown	CEW
k141_352995_flag=0_multi=58.6079_len=10200	10200	No	NA	Low-quality	5.51	0.96	0.354902	0.106919	Yes	No	Lytic	#N/A	unknown	CEW
k141_355880_flag=1_multi=11.0000_len=10636	10636	No	NA	Low-quality	15.99	1	0.939493	0.014805	Yes	Yes	Lytic	#N/A	unknown	CWW
k141_356077_flag=0_multi=12.9734_len=10062	10062	No	NA	Low-quality	4.53	0.993	0.999964	0.001057	Yes	Yes	Lytic	Myoviridae	Kyanoviridae	CWS9
k141_356870_flag=1_multi=9.0000_len=21970	21970	No	NA	Low-quality	6.25	1	0.6541	0.036766	Yes	No	Lytic	#N/A	Straboviridae	CEW
k141_357028_flag=1_multi=10.4186_len=18779	18779	No	NA	Not-determined	NA	0.987	0.860532	0.020829	Yes	No	Lytic	#N/A	unknown	CEW
k141_359779_flag=1_multi=11.0000_len=14147	14147	No	NA	Low-quality	8.26	1	0.983316	0.008819	Yes	Yes	Lytic	Myoviridae	Kyanoviridae	CEW
k141_360406_flag=0_multi=29.2646_len=14606	14606	No	NA	Low-quality	36.89	1	0.992782	0.006779	Yes	Yes	Lytic	#N/A	unknown	CWW
k141_361065_flag=0_multi=10.9111_len=22829	22829	No	NA	Low-quality	16.5	0.873	0.961866	0.012086	No	Yes	Lytic	#N/A	Guelinviridae	CEW
k141_361232_flag=0_multi=11.6076_len=18289	18289	No	NA	Low-quality	8.11	1	0.981748	0.009026	Yes	Yes	Lytic	#N/A	unknown	CEW
k141_361345_flag=0_multi=18.9018_len=12973	12973	No	NA	Low-quality	29.65	0.993	0.565937	0.046284	Yes	No	Lytic	#N/A	unknown	CEW
k141_361805_flag=0_multi=23.4774_len=13790	13790	No	NA	Low-quality	4.51	0.953	0.654585	0.036747	Yes	No	Lytic	#N/A	Straboviridae	CEW
k141_362002_flag=1_multi=9.1254_len=15156	15156	No	NA	Low-quality	8.42	1	0.652752	0.036823	Yes	No	Lytic	#N/A	Kyanoviridae	CWW
k141_362930_flag=0_multi=16.9670_len=10811	10811	No	NA	Low-quality	11.91	0.96	0.971992	0.010499	Yes	Yes	Lytic	#N/A	unknown	CES5
k141_363056_flag=0_multi=12.4936_len=12810	12810	No	NA	Low-quality	17.28	1	0.894408	0.018072	Yes	No	Lytic	#N/A	unknown	CWW
k141_365481_flag=0_multi=12.0000_len=11097	11097	No	NA	Low-quality	6.3	1	0.905325	0.017297	Yes	Yes	Lytic	#N/A	unknown	CWS1
k141_368470_flag=1_multi=7.0000_len=14542	14542	No	NA	Low-quality	4.19	1	0.947417	0.014031	Yes	Yes	Lytic	#N/A	Kyanoviridae	CEW
k141_37085_flag=0_multi=13.6803_len=12571	12571	No	NA	Low-quality	33.38	0.987	0.565227	0.046359	Yes	No	Lytic	#N/A	unknown	CWW
k141_375140_flag=0_multi=7.8987_len=14718	14718	No	NA	Low-quality	13.69	0.98	0.945753	0.014144	Yes	Yes	Lytic	#N/A	unknown	CEW
k141_375578_flag=0_multi=12.4616_len=12043	12043	No	NA	Low-quality	5.5	0.767	0.999988	0.000718	No	Yes	Lytic	#N/A	Herelleviridae	CWW
k141_376375_flag=0_multi=18.8611_len=27114	27114	No	NA	Low-quality	39.04	0.94	0.697625	0.033292	Yes	No	Lytic	#N/A	Mesyanzhinovviridae	CES5
k141_376481_flag=0_multi=17.0791_len=20114	20114	No	NA	Medium-quality	50.61	0.993	0.56377	0.046491	Yes	No	Lytic	#N/A	Drexlerviridae	CWW
k141_376494_flag=0_multi=9.9846_len=13032	13032	No	NA	Low-quality	15.12	1	0.520478	0.054404	Yes	No	Temperate	#N/A	unknown	CEW
k141_376574_flag=1_multi=8.0000_len=22272	22272	Yes	15374	Low-quality	4.28	0.993	0.955443	0.012973	Yes	Yes	Temperate	#N/A	unknown	CWW
k141_377263_flag=1_multi=10.0000_len=11231	11231	No	NA	Low-quality	5.96	0.913	0.76566	0.028099	Yes	No	Lytic	#N/A	Kyanoviridae	CWW
k141_377707_flag=1_multi=17.8133_len=66382	66382	No	NA	Low-quality	45.35	1	0.896381	0.017996	Yes	No	Lytic	#N/A	Kyanoviridae	CEW
k141_381588_flag=0_multi=14.0000_len=18863	18863	No	NA	Low-quality	22.71	0.967	0.93835	0.014937	Yes	Yes	Temperate	#N/A	unknown	CES9
k141_383255_flag=0_multi=18.9827_len=22971	22971	No	NA	Low-quality	36.13	0.987	0.845451	0.021886	Yes	No	Lytic	#N/A	Autographiviridae	CEW
k141_386081_flag=0_multi=15.0000_len=13308	13308	No	NA	Low-quality	9.16	0.98	0.977327	0.009593	Yes	Yes	Lytic	#N/A	unknown	CWW
k141_386466_flag=1_multi=10.6484_len=16919	16919	No	NA	Low-quality	5.45	0.947	0.901398	0.0176	Yes	Yes	Lytic	#N/A	unknown	CEW
k141_387466_flag=1_multi=10.0000_len=17024	17024	No	NA	High-quality	99.07	0.973	0.549331	0.04889	Yes	No	Lytic	#N/A	unknown	CWW
k141_38820_flag=1_multi=10.9499_len=14962	14962	No	NA	Low-quality	41.02	0.993	0.7987	0.025455	Yes	No	Lytic	#N/A	Straboviridae	CWW
k141_388886_flag=1_multi=12.5103_len=15504	15504	No	NA	Low-quality	14.69	1	0.846413	0.021773	Yes	No	Lytic	#N/A	Demerecviridae	CWW
k141_389258_flag=0_multi=15.9027_len=10225	10225	No	NA	Low-quality	25.44	0.98	0.999917	0.00153	Yes	Yes	Lytic	#N/A	unknown	CWW
k141_391082_flag=0_multi=13.0000_len=26592	26592	No	NA	Low-quality	42.63	1	0.995003	0.006081	Yes	Yes	Lytic	#N/A	unknown	CWW
k141_391308_flag=3_multi=35.0000_len=44989	44989	No	NA	Complete	100	0.987	0.664561	0.035973	Yes	No	Lytic	#N/A	Autographiviridae	CWW
k141_392762_flag=0_multi=17.9131_len=38475	38475	No	NA	Low-quality	21.42	0.993	0.285631	0.123178	Yes	No	Lytic	#N/A	Kyanoviridae	CEW
k141_394100_flag=1_multi=9.0000_len=20230	20230	No	NA	Low-quality	31.15	0.993	0.605306	0.041695	Yes	No	Lytic	#N/A	unknown	CWS2
k141_394642_flag=0_multi=17.4496_len=18143	18143	No	NA	Low-quality	36.73	0.747	0.970705	0.010688	No	Yes	Lytic	#N/A	unknown	CWW
k141_394983_flag=0_multi=13.2434_len=10940	10940	No	NA	Low-quality	7.75	0.92	0.996282	0.005684	Yes	Yes	Lytic	#N/A	unknown	CEW
k141_395297_flag=1_multi=10.0000_len=10685	10685	Yes	6810	Low-quality	2.93	1	0.992392	0.006855	Yes	Yes	Temperate	#N/A	Kyanoviridae	CWW
k141_396954_flag=0_multi=17.2092_len=20666	20666	No	NA	Low-quality	12.69	0.987	0.960849	0.012237	Yes	Yes	Lytic	#N/A	Drexlerviridae	CWW
k141_397563_flag=1_multi=9.0000_len=13930	13930	No	NA	Low-quality	22.48	0.907	0.998986	0.003682	Yes	Yes	Lytic	#N/A	unknown	CEW
k141_398040_flag=0_multi=12.0000_len=17483	17483	No	NA	Low-quality	5.82	0.98	0.998027	0.004551	Yes	Yes	Lytic	#N/A	Rountreeviridae	CEW
k141_398112_flag=1_multi=11.8598_len=15729	15729	No	NA	Low-quality	11.37	0.86	0.999721	0.002266	No	Yes	Lytic	#N/A	Guelinviridae	CEW
k141_399196_flag=0_multi=15.5000_len=12830	12830	No	NA	Low-quality	21.61	0.987	0.562994	0.04651	Yes	No	Lytic	#N/A	unknown	CEW
k141_40437_flag=0_multi=17.9931_len=54309	54309	No	NA	Medium-quality	58.8	1	0.999289	0.003116	Yes	Yes	Lytic	#N/A	Autographiviridae	CWS8
k141_407052_flag=1_multi=16.0000_len=11140	11140	No	NA	Low-quality	17.66	0.947	0.999972	0.000906	Yes	Yes	Lytic	#N/A	unknown	CEW
k141_409182_flag=1_multi=10.0000_len=13311	13311	No	NA	Low-quality	7.38	0.753	0.917146	0.016485	No	Yes	Lytic	#N/A	Zierdtviridae	CWW
k141_410232_flag=1_multi=8.2156_len=13492	13492	No	NA	Low-quality	21.47	1	0.99997	0.00102	Yes	Yes	Lytic	#N/A	Autographiviridae	CEW
k141_412681_flag=1_multi=10.7156_len=13288	13288	No	NA	Low-quality	22.41	1	0.588079	0.043697	Yes	No	Lytic	#N/A	unknown	CEW
k141_413130_flag=0_multi=9.9892_len=18404	18404	No	NA	Low-quality	11.61	1	0.888142	0.018695	Yes	No	Lytic	Myoviridae	Straboviridae	CEW
k141_415549_flag=1_multi=6.3647_len=11567	11567	No	NA	Low-quality	4.67	1	0.853352	0.021338	Yes	No	Lytic	#N/A	unknown	CEW
k141_416175_flag=1_multi=6.8131_len=10775	10775	No	NA	Low-quality	6.54	1	0.61366	0.040713	Yes	No	Lytic	#N/A	Straboviridae	CWW
k141_417183_flag=1_multi=10.0000_len=13904	13904	No	NA	Low-quality	21.71	0.993	0.577906	0.044716	Yes	No	Lytic	#N/A	Autographiviridae	CEW
k141_417692_flag=1_multi=11.0291_len=16540	16540	No	NA	Low-quality	38.42	1	0.609678	0.041223	Yes	No	Lytic	#N/A	unknown	CWW
k141_418974_flag=0_multi=18.2249_len=18926	18926	No	NA	Low-quality	17.51	1	0.999561	0.002776	Yes	Yes	Lytic	#N/A	Kyanoviridae	CWW
k141_419482_flag=1_multi=12.0000_len=11392	11392	No	NA	Low-quality	10.31	1	0.630488	0.039108	Yes	No	Lytic	#N/A	Demerecviridae	CEW
k141_421204_flag=1_multi=14.0000_len=10853	10853	No	NA	Low-quality	5.6	0.94	0.998041	0.004551	Yes	Yes	Lytic	#N/A	unknown	CES9
k141_4215_flag=1_multi=11.0000_len=14873	14873	No	NA	Low-quality	24.39	0.973	0.235343	0.136264	Yes	No	Lytic	#N/A	unknown	CWS8
k141_421619_flag=1_multi=11.9948_len=46372	46372	No	NA	Low-quality	33.52	0.907	0.822061	0.023548	Yes	No	Lytic	#N/A	Straboviridae	CEW
k141_421823_flag=0_multi=17.7925_len=14481	14481	No	NA	Low-quality	8.2	1	0.862731	0.020659	Yes	No	Lytic	#N/A	Kyanoviridae	CEW
k141_42200_flag=0_multi=13.9964_len=79201	79201	No	NA	Low-quality	45.6	0.98	0.959834	0.012388	Yes	Yes	Lytic	#N/A	Kyanoviridae	CEW
k141_422328_flag=1_multi=9.0000_len=10372	10372	No	NA	Low-quality	16.61	0.96	0.999453	0.002965	Yes	Yes	Lytic	#N/A	Autographiviridae	CEW
k141_422590_flag=0_multi=14.6345_len=11119	11119	No	NA	Low-quality	7.69	1	0.40894	0.094078	Yes	No	Lytic	#N/A	unknown	CWW
k141_422693_flag=1_multi=11.9942_len=20676	20676	No	NA	Medium-quality	60.42	1	0.791162	0.02604	Yes	No	Lytic	#N/A	Straboviridae	CEW
k141_423518_flag=0_multi=22.4343_len=13040	13040	No	NA	Low-quality	17.18	0.993	0.767564	0.028004	Yes	No	Lytic	#N/A	unknown	CEW
k141_425215_flag=0_multi=27.8837_len=10353	10353	No	NA	Low-quality	22.99	0.993	0.991757	0.007044	Yes	Yes	Temperate	#N/A	Autographiviridae	CWW
k141_425713_flag=0_multi=16.0000_len=14317	14317	No	NA	Low-quality	6.75	0.973	0.786758	0.02638	Yes	No	Lytic	#N/A	Herelleviridae	CEW
k141_427340_flag=0_multi=19.0000_len=13354	13354	No	NA	Not-determined	NA	0.653	0.906409	0.01726	No	Yes	Lytic	#N/A	unknown	CWW
k141_427788_flag=1_multi=10.0000_len=10114	10114	No	NA	Low-quality	23.84	0.827	0.998415	0.004268	No	Yes	Lytic	#N/A	unknown	CES8
k141_430795_flag=0_multi=9.9605_len=14719	14719	No	NA	Low-quality	20.19	0.98	0.587178	0.043716	Yes	No	Lytic	#N/A	unknown	CWW
k141_431280_flag=1_multi=17.0000_len=93388	93388	No	NA	High-quality	93.59	1	0.907905	0.017109	Yes	Yes	Lytic	#N/A	Casjensviridae	CWW
k141_43217_flag=0_multi=22.0000_len=12649	12649	No	NA	Low-quality	39.96	1	0.999245	0.00321	Yes	Yes	Lytic	#N/A	unknown	CEW
k141_433082_flag=0_multi=15.0706_len=16320	16320	No	NA	Low-quality	10.33	0.987	0.911609	0.016957	Yes	Yes	Lytic	#N/A	Straboviridae	CEW
k141_433316_flag=1_multi=8.0000_len=16937	16937	No	NA	Low-quality	10.29	1	0.998107	0.004513	Yes	Yes	Lytic	Myoviridae	Kyanoviridae	CWW
k141_43427_flag=0_multi=16.9714_len=12444	12444	No	NA	Low-quality	5.93	0.907	0.917973	0.016429	Yes	Yes	Lytic	#N/A	Guelinviridae	CWW
k141_43449_flag=0_multi=39.0000_len=17413	17413	No	NA	Complete	100	1	0.872022	0.01996	Yes	No	Lytic	#N/A	unknown	CEW
k141_434778_flag=1_multi=14.0000_len=10381	10381	No	NA	Low-quality	9.61	0.993	0.622379	0.039807	Yes	No	Lytic	#N/A	unknown	CEW
k141_435429_flag=0_multi=10.9915_len=25930	25930	No	NA	Low-quality	14.85	0.733	0.99572	0.005835	No	Yes	Lytic	#N/A	unknown	CEW
k141_435936_flag=1_multi=7.0000_len=12544	12544	No	NA	Low-quality	10.68	0.98	0.99996	0.001057	Yes	Yes	Lytic	#N/A	unknown	CES8
k141_437269_flag=0_multi=9.9859_len=14229	14229	No	NA	Low-quality	7.57	1	0.99779	0.004815	Yes	Yes	Lytic	Myoviridae	Kyanoviridae	CEW
k141_438501_flag=0_multi=16.7830_len=57899	57899	No	NA	Low-quality	27.46	1	0.960328	0.012369	Yes	Yes	Lytic	#N/A	Straboviridae	CWW
k141_438941_flag=0_multi=40.2103_len=17962	17962	No	NA	Low-quality	35.93	0.987	0.725275	0.031045	Yes	No	Lytic	#N/A	unknown	CWW
k141_440449_flag=0_multi=15.0000_len=23679	23679	No	NA	Low-quality	42.07	1	0.923846	0.015994	Yes	Yes	Lytic	#N/A	unknown	CEW
k141_441479_flag=1_multi=13.0000_len=19830	19830	No	NA	Low-quality	47.77	0.94	0.999729	0.002266	Yes	Yes	Lytic	#N/A	unknown	CEW
k141_44425_flag=1_multi=11.0000_len=31191	31191	No	NA	Low-quality	7.76	0	0.927064	0.015843	No	Yes	Lytic	#N/A	unknown	CWW
k141_444917_flag=3_multi=41.0000_len=17222	17222	No	NA	Complete	100	1	0.866464	0.020375	Yes	No	Lytic	#N/A	unknown	CWW
k141_445038_flag=1_multi=12.0682_len=14789	14789	No	NA	Low-quality	41.26	0.993	0.92832	0.01573	Yes	Yes	Lytic	#N/A	unknown	CEW
k141_446749_flag=0_multi=6.1155_len=13794	13794	No	NA	Not-determined	NA	0	0.901903	0.017581	No	Yes	Lytic	#N/A	unknown	CWS9
k141_448855_flag=1_multi=16.0000_len=32587	32587	No	NA	Medium-quality	66.13	1	0.997109	0.005155	Yes	Yes	Lytic	#N/A	unknown	CWS4
k141_448881_flag=1_multi=10.6807_len=14285	14285	No	NA	Not-determined	NA	0	0.976193	0.009763	No	Yes	Lytic	#N/A	unknown	CWS9
k141_450868_flag=1_multi=11.0000_len=26234	26234	No	NA	Low-quality	31.59	0.927	0.563685	0.046491	Yes	No	Lytic	#N/A	unknown	CWS3
k141_451891_flag=1_multi=11.9413_len=29374	29374	No	NA	Low-quality	17.62	0	0.985294	0.008498	No	Yes	Lytic	#N/A	Straboviridae	CEW
k141_454637_flag=1_multi=13.8701_len=21559	21559	No	NA	Low-quality	31.15	0.94	0.744651	0.029572	Yes	No	Lytic	#N/A	Mesyanzhinovviridae	CES6
k141_455269_flag=0_multi=15.9909_len=36441	36441	No	NA	Low-quality	22.66	0.98	0.9996	0.002644	Yes	Yes	Lytic	#N/A	unknown	CWW
k141_455385_flag=0_multi=12.5922_len=21651	21651	No	NA	Medium-quality	54.06	1	0.210216	0.143685	Yes	No	Lytic	#N/A	unknown	CEW
k141_456073_flag=0_multi=17.9234_len=19012	19012	No	NA	Low-quality	13.45	1	0.875858	0.019752	Yes	No	Lytic	#N/A	Straboviridae	CWW
k141_456200_flag=0_multi=11.7939_len=18415	18415	No	NA	Low-quality	15.19	1	0.982544	0.008951	Yes	Yes	Lytic	#N/A	unknown	CEW
k141_458512_flag=0_multi=16.4183_len=14467	14467	No	NA	Low-quality	32.32	1	0.974305	0.010027	Yes	Yes	Lytic	Autographiviridae	Autographiviridae	CEW
k141_459456_flag=0_multi=10.0000_len=13405	13405	No	NA	Low-quality	21.95	1	0.985347	0.008479	Yes	Yes	Lytic	#N/A	Mesyanzhinovviridae	CEW
k141_460626_flag=0_multi=31.9791_len=16718	16718	No	NA	Low-quality	34.65	0.987	0.627184	0.03941	Yes	No	Lytic	#N/A	Drexlerviridae	CEW
k141_461465_flag=0_multi=8.9358_len=12623	12623	No	NA	Low-quality	21.27	1	0.985724	0.008403	Yes	Yes	Lytic	#N/A	unknown	CEW
k141_463058_flag=0_multi=9.9894_len=18881	18881	No	NA	Medium-quality	52	0.98	0.888751	0.0186	Yes	No	Lytic	#N/A	unknown	CEW
k141_464570_flag=0_multi=15.8174_len=58340	58340	No	NA	High-quality	96.84	1	0.969599	0.010915	Yes	Yes	Temperate	#N/A	Mesyanzhinovviridae	CWW
k141_466119_flag=1_multi=10.0000_len=10376	10376	No	NA	Low-quality	24.45	0.907	0.999999	0.000397	Yes	Yes	Lytic	#N/A	unknown	CES9
k141_466221_flag=0_multi=11.7757_len=20527	20527	No	NA	Low-quality	33.01	1	0.850293	0.021508	Yes	No	Lytic	#N/A	unknown	CEW
k141_466624_flag=1_multi=10.0000_len=13620	13620	No	NA	Low-quality	8.16	0.633	0.958441	0.012558	No	Yes	Lytic	#N/A	Kyanoviridae	CWW
k141_467790_flag=1_multi=9.9872_len=24074	24074	No	NA	Low-quality	37.52	0.5	0.97768	0.009574	No	Yes	Lytic	#N/A	unknown	CEW
k141_469220_flag=0_multi=10.9848_len=14569	14569	No	NA	Low-quality	4.07	0.953	0.9541	0.013124	Yes	Yes	Lytic	#N/A	unknown	CEW
k141_469946_flag=1_multi=11.0000_len=15302	15302	No	NA	Low-quality	21.3	0.993	0.566358	0.046189	Yes	No	Lytic	Siphoviridae	Ackermannviridae	CWW
k141_470343_flag=1_multi=11.0000_len=17762	17762	No	NA	Low-quality	21.06	1	0.980716	0.009215	Yes	Yes	Lytic	#N/A	unknown	CWW
k141_471357_flag=0_multi=46.0000_len=36911	36911	No	NA	Low-quality	22.16	0.993	0.86228	0.020659	Yes	No	Lytic	#N/A	unknown	CWW
k141_4717_flag=0_multi=18.8049_len=11145	11145	No	NA	Medium-quality	64.05	1	0.65203	0.036861	Yes	No	Lytic	#N/A	Peduoviridae	CWW
k141_471944_flag=1_multi=9.0000_len=14160	14160	No	NA	Low-quality	11.69	0.993	0.997015	0.005306	Yes	Yes	Lytic	#N/A	unknown	CWW
k141_472992_flag=0_multi=8.9008_len=10825	10825	No	NA	Low-quality	6.54	0.993	0.415024	0.092888	Yes	No	Lytic	Myoviridae	Kyanoviridae	CEW
k141_474258_flag=0_multi=15.9135_len=40230	40230	No	NA	Low-quality	43.55	1	0.998712	0.004003	Yes	Yes	Lytic	#N/A	Autographiviridae	CWS7
k141_474668_flag=0_multi=11.6256_len=14763	14763	No	NA	Low-quality	7.95	0.947	0.964114	0.011708	Yes	Yes	Lytic	#N/A	Kyanoviridae	CWW
k141_475421_flag=1_multi=13.5885_len=13022	13022	No	NA	Low-quality	29.82	0.993	0.99999	0.000661	Yes	Yes	Lytic	#N/A	Zobellviridae	CWW
k141_475524_flag=1_multi=16.0000_len=11051	11051	No	NA	Low-quality	8.74	0.98	0.998916	0.003739	Yes	Yes	Lytic	#N/A	unknown	CEW
k141_475765_flag=1_multi=11.0000_len=11432	11432	No	NA	Low-quality	5.5	1	0.999994	0.000585	Yes	Yes	Lytic	Myoviridae	Kyanoviridae	CEW
k141_475919_flag=1_multi=10.0000_len=12681	12681	No	NA	Low-quality	33.5	1	0.938665	0.014937	Yes	Yes	Lytic	#N/A	unknown	CWW
k141_47659_flag=1_multi=10.0000_len=11247	11247	No	NA	Low-quality	3.12	0.96	0.690229	0.033972	Yes	No	Lytic	#N/A	Straboviridae	CEW
k141_478190_flag=0_multi=15.0000_len=10283	10283	No	NA	Low-quality	29.25	1	0.999969	0.00102	Yes	Yes	Lytic	#N/A	unknown	CWW
k141_479084_flag=0_multi=15.0000_len=13763	13763	No	NA	Low-quality	23.2	1	0.996366	0.005627	Yes	Yes	Lytic	#N/A	unknown	CWW
k141_479396_flag=0_multi=12.9743_len=10420	10420	No	NA	Low-quality	21.02	1	0.999286	0.003116	Yes	Yes	Lytic	#N/A	unknown	CWW
k141_480687_flag=1_multi=12.1654_len=10463	10463	No	NA	Low-quality	4.45	0.893	0.963778	0.011764	No	Yes	Lytic	#N/A	unknown	CWW
k141_482632_flag=0_multi=17.9840_len=23506	23506	No	NA	Low-quality	13.06	0.993	0.578752	0.044584	Yes	No	Lytic	#N/A	Kyanoviridae	CEW
k141_483646_flag=0_multi=50.1955_len=113849	113849	No	NA	Medium-quality	68.12	0.987	0.907587	0.017184	Yes	Yes	Lytic	#N/A	unknown	CWW
k141_484111_flag=1_multi=9.0000_len=13616	13616	No	NA	Low-quality	7.5	0.88	0.954432	0.013105	No	Yes	Lytic	#N/A	unknown	CEW
k141_484188_flag=1_multi=9.9785_len=15233	15233	No	NA	Low-quality	40.39	1	0.998917	0.003739	Yes	Yes	Lytic	#N/A	unknown	CWS1
k141_486184_flag=1_multi=6.0000_len=11128	11128	No	NA	Low-quality	24.34	1	0.994617	0.006175	Yes	Yes	Lytic	#N/A	unknown	CWW
k141_487651_flag=0_multi=7.2959_len=12252	12252	No	NA	Low-quality	7.07	0.707	0.990163	0.007346	No	Yes	Lytic	Myoviridae	Straboviridae	CWW
k141_488525_flag=1_multi=10.0000_len=14394	14394	No	NA	Low-quality	4.15	0.993	0.952382	0.013351	Yes	Yes	Lytic	Myoviridae	unknown	CWW
k141_490618_flag=1_multi=10.0000_len=13646	13646	No	NA	Low-quality	3.95	1	0.613246	0.040751	Yes	No	Lytic	Myoviridae	Straboviridae	CEW
k141_490949_flag=1_multi=10.9912_len=11036	11036	No	NA	Low-quality	30.97	1	0.999639	0.002493	Yes	Yes	Lytic	#N/A	Demerecviridae	CEW
k141_49120_flag=1_multi=10.8197_len=25214	25214	No	NA	Low-quality	19.85	0.987	0.769836	0.027853	Yes	No	Lytic	#N/A	unknown	CWS9
k141_491719_flag=0_multi=35.9773_len=34013	34013	No	NA	Medium-quality	60.4	1	0.955015	0.013011	Yes	Yes	Temperate	#N/A	Autographiviridae	CWW
k141_491888_flag=1_multi=11.0000_len=16172	16172	No	NA	Low-quality	6.86	1	0.957697	0.01269	Yes	Yes	Lytic	Myoviridae	Kyanoviridae	CES7
k141_492104_flag=1_multi=14.9994_len=25042	25042	No	NA	Low-quality	45.54	0.987	0.789864	0.026135	Yes	No	Lytic	#N/A	Mesyanzhinovviridae	CWS5
k141_492342_flag=1_multi=19.0000_len=65071	65071	No	NA	Medium-quality	56.79	0.807	0.999961	0.001057	No	Yes	Lytic	#N/A	unknown	CES9
k141_492343_flag=1_multi=9.0000_len=13916	13916	No	NA	Low-quality	7.02	0.953	0.332571	0.111942	Yes	No	Temperate	#N/A	unknown	CWS6
k141_493146_flag=0_multi=8.9888_len=15922	15922	No	NA	Low-quality	15.1	1	0.940093	0.014805	Yes	Yes	Lytic	#N/A	unknown	CWW
k141_493622_flag=1_multi=11.0000_len=13577	13577	No	NA	Low-quality	9.72	0.933	0.999639	0.002493	Yes	Yes	Lytic	#N/A	unknown	CWW
k141_493766_flag=0_multi=11.8274_len=14665	14665	No	NA	Low-quality	20.61	0.86	0.99486	0.006118	No	Yes	Lytic	#N/A	unknown	CEW
k141_493881_flag=1_multi=12.0000_len=11548	11548	No	NA	Low-quality	14.38	0.993	0.824957	0.023378	Yes	No	Lytic	#N/A	Mesyanzhinovviridae	CEW
k141_496424_flag=1_multi=15.4745_len=18190	18190	No	NA	Low-quality	27.81	0.98	0.572923	0.045264	Yes	No	Lytic	#N/A	unknown	CWW
k141_499165_flag=0_multi=12.0000_len=12193	12193	No	NA	Low-quality	11.1	0.68	0.991265	0.007157	No	Yes	Lytic	Siphoviridae	unknown	CEW
k141_500599_flag=1_multi=9.9169_len=10857	10857	No	NA	Low-quality	24.72	0.973	1	0	Yes	Yes	Lytic	#N/A	Zobellviridae	CWW
k141_501063_flag=1_multi=7.0000_len=12933	12933	Yes	11141	Low-quality	6.22	0.987	0.928313	0.01573	Yes	Yes	Temperate	#N/A	Kyanoviridae	CEW
k141_501489_flag=1_multi=8.0000_len=15501	15501	No	NA	Low-quality	8.89	1	0.967729	0.011255	Yes	Yes	Lytic	Myoviridae	Chaseviridae	CEW
k141_503056_flag=0_multi=12.9934_len=10751	10751	No	NA	Low-quality	23.54	1	0.999773	0.002077	Yes	Yes	Lytic	#N/A	Autographiviridae	CWW
k141_504128_flag=0_multi=11.9803_len=12437	12437	No	NA	Low-quality	34.72	1	0.656584	0.036596	Yes	No	Lytic	#N/A	unknown	CWW
k141_505635_flag=1_multi=11.0000_len=21262	21262	No	NA	Medium-quality	50.11	1	0.994875	0.006118	Yes	Yes	Lytic	#N/A	unknown	CES9
k141_506753_flag=0_multi=13.9431_len=10186	10186	No	NA	Low-quality	5.84	0.9	0.999993	0.000604	No	Yes	Lytic	#N/A	unknown	CWW
k141_510685_flag=0_multi=19.1283_len=29690	29690	No	NA	Medium-quality	85.07	1	0.973633	0.01014	Yes	Yes	Lytic	#N/A	unknown	CEW
k141_510982_flag=0_multi=21.9596_len=11582	11582	No	NA	Low-quality	6.61	0.927	0.869066	0.020205	Yes	No	Lytic	#N/A	unknown	CWW
k141_511005_flag=1_multi=14.0000_len=25689	25689	No	NA	Low-quality	44.73	0.993	0.973677	0.01014	Yes	Yes	Lytic	#N/A	unknown	CES6
k141_511400_flag=0_multi=7.0000_len=11622	11622	No	NA	Low-quality	11.12	0.987	0.996851	0.005363	Yes	Yes	Lytic	#N/A	unknown	CWW
k141_512128_flag=0_multi=17.1059_len=10056	10056	No	NA	Low-quality	26	1	0.648694	0.037201	Yes	No	Lytic	Siphoviridae	unknown	CEW
k141_513748_flag=1_multi=17.5692_len=40680	40680	No	NA	Low-quality	28.07	0.747	0.994593	0.006194	No	Yes	Lytic	#N/A	Straboviridae	CWW
k141_515161_flag=1_multi=10.0000_len=27511	27511	No	NA	Medium-quality	50.07	0.94	0.97206	0.01048	Yes	Yes	Lytic	#N/A	Autographiviridae	CEW
k141_515185_flag=0_multi=13.8914_len=42490	42490	No	NA	Low-quality	32.63	1	0.995282	0.005986	Yes	Yes	Lytic	#N/A	unknown	CEW
k141_515515_flag=1_multi=9.5953_len=10831	10831	No	NA	Low-quality	10.23	1	0.389826	0.098969	Yes	No	Lytic	#N/A	Demerecviridae	CWW
k141_515805_flag=0_multi=10.9907_len=23775	23775	No	NA	Low-quality	33.05	0.987	0.114806	0.181075	Yes	No	Lytic	#N/A	Drexlerviridae	CEW
k141_517274_flag=1_multi=10.0000_len=14408	14408	No	NA	Low-quality	7.68	0.973	0.999614	0.002625	Yes	Yes	Lytic	#N/A	Kyanoviridae	CES8
k141_518625_flag=1_multi=10.8417_len=22152	22152	No	NA	Low-quality	11.67	0.947	0.992497	0.006836	Yes	Yes	Lytic	Myoviridae	Kyanoviridae	CEW
k141_518844_flag=0_multi=13.9908_len=31340	31340	No	NA	Medium-quality	85.49	1	0.568383	0.045849	Yes	No	Lytic	#N/A	Casjensviridae	CWW
k141_519570_flag=0_multi=16.9646_len=10082	10082	No	NA	Not-determined	NA	0	0.927564	0.015806	No	Yes	Lytic	#N/A	unknown	CWW
k141_519592_flag=1_multi=10.9403_len=18219	18219	No	NA	Low-quality	12.83	1	0.467905	0.078254	Yes	No	Lytic	#N/A	unknown	CEW
k141_520311_flag=1_multi=8.6151_len=12515	12515	No	NA	Low-quality	22.47	0.96	0.47745	0.074949	Yes	No	Lytic	#N/A	unknown	CEW
k141_520508_flag=0_multi=13.1235_len=13602	13602	No	NA	Low-quality	33.67	1	0.926926	0.015843	Yes	Yes	Temperate	#N/A	Autographiviridae	CEW
k141_521695_flag=1_multi=10.5665_len=10111	10111	No	NA	Low-quality	15.32	0	0.992444	0.006855	No	Yes	Lytic	#N/A	unknown	CWW
k141_52248_flag=0_multi=9.9698_len=13270	13270	No	NA	Low-quality	6.99	0.887	0.998054	0.004551	No	Yes	Lytic	#N/A	Kyanoviridae	CEW
k141_522508_flag=1_multi=14.0000_len=44118	44118	No	NA	High-quality	100	0.993	0.768702	0.02791	Yes	No	Lytic	#N/A	unknown	CWS8
k141_522850_flag=0_multi=12.9937_len=42311	42311	No	NA	Low-quality	34.08	0.993	0.874552	0.019828	Yes	No	Lytic	#N/A	unknown	CWW
k141_523811_flag=1_multi=7.0000_len=10121	10121	No	NA	Not-determined	NA	0	0.99951	0.002927	No	Yes	Lytic	#N/A	unknown	CEW
k141_524100_flag=0_multi=15.4148_len=12144	12144	No	NA	Low-quality	16.25	0.787	0.948292	0.013842	No	Yes	Lytic	#N/A	unknown	CWW
k141_525321_flag=1_multi=12.0000_len=36133	36133	No	NA	Low-quality	10.28	0.993	0.456045	0.082087	Yes	No	Lytic	#N/A	Kyanoviridae	CEW
k141_527188_flag=0_multi=12.9739_len=10270	10270	No	NA	Low-quality	29.44	0.907	0.982674	0.008951	Yes	Yes	Lytic	#N/A	unknown	CEW
k141_528243_flag=1_multi=11.0000_len=10099	10099	No	NA	Low-quality	6.94	0.833	1	0	No	Yes	Lytic	#N/A	unknown	CEW
k141_52902_flag=0_multi=18.2924_len=18436	18436	No	NA	Low-quality	25.24	1	0.93028	0.015541	Yes	Yes	Lytic	#N/A	unknown	CWW
k141_530107_flag=0_multi=10.8951_len=20246	20246	No	NA	Low-quality	12.16	1	0.999272	0.003135	Yes	Yes	Lytic	#N/A	Kyanoviridae	CWW
k141_531151_flag=1_multi=8.9051_len=14230	14230	No	NA	Low-quality	8.4	1	0.999997	0.00051	Yes	Yes	Lytic	#N/A	Kyanoviridae	CWW
k141_532655_flag=0_multi=24.9138_len=27353	27353	No	NA	Medium-quality	77.71	1	0.957473	0.012746	Yes	Yes	Lytic	#N/A	Autographiviridae	CWW
k141_533474_flag=0_multi=8.0490_len=14209	14209	No	NA	Low-quality	28.46	1	0.752152	0.029137	Yes	No	Lytic	#N/A	Autographiviridae	CWW
k141_533625_flag=0_multi=9.8202_len=11068	11068	No	NA	Medium-quality	73.85	1	0.667133	0.035784	Yes	No	Lytic	#N/A	unknown	CWW
k141_535759_flag=0_multi=11.4009_len=11094	11094	No	NA	Low-quality	3.95	0	0.95726	0.012784	No	Yes	Lytic	#N/A	unknown	CWW
k141_536997_flag=0_multi=12.0687_len=14875	14875	No	NA	Low-quality	40.56	1	0.623328	0.03975	Yes	No	Lytic	#N/A	Autographiviridae	CWW
k141_538776_flag=0_multi=10.8112_len=15417	15417	No	NA	Low-quality	5.25	0.92	0.998805	0.00389	Yes	Yes	Lytic	#N/A	Rountreeviridae	CWW
k141_538928_flag=1_multi=10.0000_len=12175	12175	No	NA	Low-quality	32.65	1	0.464137	0.07967	Yes	No	Lytic	#N/A	unknown	CEW
k141_543640_flag=1_multi=13.0000_len=42242	42242	No	NA	Low-quality	23.54	1	0.973329	0.010178	Yes	Yes	Lytic	#N/A	Kyanoviridae	CEW
k141_543700_flag=0_multi=52.8777_len=16692	16692	No	NA	Low-quality	6.7	0.993	1	0	Yes	Yes	Lytic	Myoviridae	Kyanoviridae	CEW
k141_545224_flag=0_multi=15.0000_len=10426	10426	No	NA	Low-quality	19.09	1	0.999251	0.00321	Yes	Yes	Lytic	#N/A	unknown	CES5
k141_54706_flag=0_multi=15.9825_len=37892	37892	No	NA	Medium-quality	59.77	1	0.984449	0.008611	Yes	Yes	Lytic	#N/A	Casjensviridae	CWW
k141_548557_flag=1_multi=8.0000_len=17034	17034	No	NA	Low-quality	10.52	0.967	0.499905	0.062788	Yes	No	Lytic	#N/A	Zierdtviridae	CEW
k141_549244_flag=1_multi=9.0000_len=15692	15692	No	NA	Low-quality	4.51	0.927	0.993272	0.006685	Yes	Yes	Lytic	#N/A	Kyanoviridae	CEW
k141_550664_flag=1_multi=15.9963_len=13244	13244	No	NA	Low-quality	15.71	1	0.85828	0.020923	Yes	No	Lytic	#N/A	unknown	CES9
k141_55144_flag=0_multi=30.9498_len=13279	13279	No	NA	Low-quality	24.71	1	0.985206	0.008498	Yes	Yes	Lytic	#N/A	Kyanoviridae	CWW
k141_551906_flag=0_multi=15.9703_len=17366	17366	No	NA	Low-quality	43.73	0.853	0.999998	0.000453	No	Yes	Lytic	#N/A	unknown	CEW
k141_553180_flag=0_multi=13.0000_len=12270	12270	No	NA	Low-quality	27.93	0.993	0.999999	0.00034	Yes	Yes	Lytic	#N/A	Zobellviridae	CWW
k141_554516_flag=0_multi=27.9862_len=43199	43199	No	NA	Low-quality	28.79	1	0.784069	0.026607	Yes	No	Lytic	#N/A	Straboviridae	CEW
k141_555624_flag=0_multi=11.0000_len=10801	10801	No	NA	Not-determined	NA	0.607	0.914704	0.016636	No	Yes	Lytic	#N/A	unknown	CEW
k141_555837_flag=1_multi=10.0000_len=14412	14412	No	NA	Low-quality	10.32	0.98	0.967882	0.011255	Yes	Yes	Lytic	#N/A	unknown	CEW
k141_555863_flag=0_multi=54.4818_len=13889	13889	No	NA	Low-quality	28.62	0.967	0.800457	0.02521	Yes	No	Lytic	#N/A	Drexlerviridae	CWW
k141_556744_flag=0_multi=17.5651_len=21868	21868	No	NA	Low-quality	14.82	1	0.75043	0.029213	Yes	No	Lytic	#N/A	Demerecviridae	CWW
k141_5578_flag=0_multi=41.0293_len=14644	14644	No	NA	Low-quality	43.3	0.987	0.946947	0.014068	Yes	Yes	Lytic	#N/A	unknown	CWW
k141_558578_flag=1_multi=11.0000_len=11243	11243	Yes	9884	Low-quality	0.61	0	0.920849	0.016278	No	Yes	Temperate	#N/A	unknown	CWW
k141_558967_flag=0_multi=23.3665_len=26174	26174	No	NA	Low-quality	22.6	0.987	0.999848	0.001907	Yes	Yes	Lytic	#N/A	unknown	CWW
k141_559314_flag=1_multi=9.8384_len=11207	11207	No	NA	Low-quality	9.77	1	0.658245	0.036502	Yes	No	Lytic	Siphoviridae	unknown	CEW
k141_561582_flag=0_multi=10.0000_len=10390	10390	No	NA	Low-quality	12.3	1	0.927783	0.015787	Yes	Yes	Lytic	#N/A	unknown	CWW
k141_56440_flag=0_multi=10.5430_len=10417	10417	No	NA	Low-quality	26.27	0.993	0.97916	0.009423	Yes	Yes	Lytic	#N/A	unknown	CWW
k141_564847_flag=1_multi=13.5931_len=18449	18449	No	NA	Low-quality	10.43	0.993	0.997375	0.005061	Yes	Yes	Lytic	#N/A	Demerecviridae	CWW
k141_565196_flag=0_multi=10.9791_len=10690	10690	No	NA	Low-quality	3.64	0.973	0.9963	0.005684	Yes	Yes	Lytic	#N/A	Kyanoviridae	CEW
k141_565977_flag=0_multi=17.3599_len=11001	11001	No	NA	Low-quality	22.27	0.953	0.999252	0.003191	Yes	Yes	Lytic	#N/A	unknown	CEW
k141_568159_flag=0_multi=20.9168_len=15750	15750	No	NA	Low-quality	9.63	0.987	0.994859	0.006118	Yes	Yes	Lytic	#N/A	Kyanoviridae	CWW
k141_570573_flag=1_multi=10.0000_len=11341	11341	No	NA	Low-quality	10.59	0.993	0.987589	0.007874	Yes	Yes	Lytic	#N/A	Ackermannviridae	CEW
k141_572057_flag=1_multi=9.0000_len=19170	19170	No	NA	Medium-quality	54.18	0.993	0.624378	0.039712	Yes	No	Lytic	#N/A	unknown	CEW
k141_572276_flag=0_multi=13.3737_len=11800	11800	No	NA	Low-quality	32.73	1	0.999058	0.003456	Yes	Yes	Lytic	#N/A	Demerecviridae	CWW
k141_572562_flag=0_multi=12.9479_len=10280	10280	No	NA	Low-quality	7.43	0.98	0.787992	0.026248	Yes	No	Lytic	#N/A	unknown	CEW
k141_572698_flag=1_multi=26.7766_len=16231	16231	No	NA	High-quality	100	1	0.383614	0.100385	Yes	No	Lytic	#N/A	Casjensviridae	CEW
k141_572823_flag=1_multi=13.0000_len=22661	22661	No	NA	Low-quality	4.05	0	0.955931	0.012897	No	Yes	Lytic	#N/A	unknown	CWS7
k141_573072_flag=0_multi=61.7310_len=18988	18988	No	NA	Low-quality	13.83	1	0.612047	0.040921	Yes	No	Lytic	#N/A	unknown	CEW
k141_573314_flag=1_multi=10.0000_len=15519	15519	No	NA	Low-quality	14.66	0.98	0.536597	0.051042	Yes	No	Lytic	#N/A	Demerecviridae	CEW
k141_573702_flag=0_multi=12.4224_len=28526	28526	No	NA	Low-quality	15.95	1	0.959869	0.012388	Yes	Yes	Lytic	#N/A	Kyanoviridae	CWW
k141_574294_flag=0_multi=16.2749_len=15793	15793	No	NA	Low-quality	26.21	0	0.978951	0.009423	No	Yes	Lytic	#N/A	unknown	CEW
k141_575562_flag=0_multi=17.0000_len=74236	74236	No	NA	Low-quality	35.17	0.98	0.960696	0.012274	Yes	Yes	Lytic	#N/A	Straboviridae	CWW
k141_575800_flag=0_multi=15.5967_len=18504	18504	No	NA	Medium-quality	53.9	1	0.999676	0.002436	Yes	Yes	Lytic	#N/A	unknown	CEW
k141_575995_flag=1_multi=11.0000_len=13209	13209	No	NA	Not-determined	NA	0	0.961889	0.012086	No	Yes	Lytic	#N/A	unknown	CWW
k141_576967_flag=0_multi=15.9830_len=19537	19537	No	NA	Low-quality	33.23	0.92	0.967785	0.011255	Yes	Yes	Temperate	#N/A	unknown	CEW
k141_577003_flag=0_multi=21.9898_len=45607	45607	No	NA	Low-quality	25.38	1	0.999533	0.002851	Yes	Yes	Lytic	#N/A	Kyanoviridae	CWW
k141_577531_flag=1_multi=9.8770_len=14406	14406	No	NA	Low-quality	10.97	1	0.986712	0.008195	Yes	Yes	Lytic	#N/A	unknown	CEW
k141_57790_flag=1_multi=10.0000_len=19468	19468	No	NA	Low-quality	47.38	0.973	0.326444	0.113377	Yes	No	Temperate	#N/A	Casjensviridae	CWW
k141_578635_flag=0_multi=36.0000_len=21405	21405	No	NA	Low-quality	9.6	1	0.945337	0.014163	Yes	Yes	Lytic	Myoviridae	Kyanoviridae	CEW
k141_578975_flag=1_multi=18.9340_len=18402	18402	Yes	11951	Low-quality	6.59	1	0.803222	0.024926	Yes	No	Temperate	#N/A	Kyanoviridae	CEW
k141_579822_flag=0_multi=9.4266_len=18366	18366	No	NA	Low-quality	9.51	1	0.98836	0.007837	Yes	Yes	Lytic	Myoviridae	Kyanoviridae	CEW
k141_580812_flag=0_multi=30.3632_len=26795	26795	No	NA	Low-quality	10.75	1	0.997937	0.004645	Yes	Yes	Lytic	Myoviridae	Kyanoviridae	CWW
k141_581839_flag=1_multi=11.4328_len=11971	11971	No	NA	Low-quality	21.41	0.993	0.993995	0.006439	Yes	Yes	Lytic	#N/A	unknown	CWW
k141_582116_flag=1_multi=7.8457_len=15436	15436	No	NA	High-quality	100	1	0.934752	0.015182	Yes	Yes	Lytic	#N/A	Casjensviridae	CEW
k141_582916_flag=0_multi=19.9838_len=25958	25958	No	NA	Low-quality	31.99	0.92	0.999654	0.002436	Yes	Yes	Lytic	#N/A	unknown	CES5
k141_584404_flag=0_multi=12.9861_len=19083	19083	No	NA	Low-quality	20.83	0.967	1	0.000283	Yes	Yes	Lytic	#N/A	Salasmaviridae	CES5
k141_585506_flag=0_multi=26.0131_len=12638	12638	No	NA	Low-quality	8.73	0.973	0.471695	0.076837	Yes	No	Lytic	#N/A	Straboviridae	CEW
k141_587672_flag=0_multi=8.9517_len=12722	12722	No	NA	Low-quality	32.05	1	0.999971	0.000982	Yes	Yes	Lytic	#N/A	unknown	CWW
k141_589129_flag=1_multi=11.6404_len=11771	11771	No	NA	Low-quality	7.06	1	0.988777	0.007648	Yes	Yes	Lytic	#N/A	unknown	CWW
k141_590974_flag=1_multi=11.0000_len=12339	12339	No	NA	Low-quality	7.41	1	0.940824	0.014729	Yes	Yes	Lytic	Myoviridae	Kyanoviridae	CEW
k141_592045_flag=0_multi=35.9804_len=39763	39763	No	NA	Complete	100	0.993	0.951828	0.013407	Yes	Yes	Lytic	#N/A	unknown	CWW
k141_59260_flag=0_multi=27.9753_len=24188	24188	No	NA	Low-quality	10.77	1	0.96849	0.011198	Yes	Yes	Lytic	Myoviridae	Kyanoviridae	CWW
k141_593825_flag=1_multi=12.0000_len=13945	13945	No	NA	Low-quality	29.12	0.993	0.875038	0.019809	Yes	No	Lytic	#N/A	unknown	CEW
k141_59615_flag=0_multi=29.9831_len=16661	16661	No	NA	Low-quality	40.18	0.987	0.999774	0.002077	Yes	Yes	Lytic	#N/A	Autographiviridae	CWW
k141_596398_flag=1_multi=8.0000_len=11531	11531	No	NA	Low-quality	3.29	0.94	0.991094	0.007214	Yes	Yes	Lytic	#N/A	Straboviridae	CEW
k141_597246_flag=1_multi=6.0000_len=10015	10015	No	NA	Low-quality	4.13	0.973	0.794144	0.025795	Yes	No	Lytic	#N/A	Straboviridae	CEW
k141_602384_flag=0_multi=19.0000_len=11742	11742	No	NA	Low-quality	7.79	0.927	0.69476	0.0335	Yes	No	Lytic	#N/A	unknown	CWW
k141_6026_flag=0_multi=11.9726_len=17819	17819	No	NA	Low-quality	14.72	1	0.993863	0.006553	Yes	Yes	Lytic	#N/A	Kyanoviridae	CEW
k141_602798_flag=1_multi=8.0000_len=10975	10975	Yes	9042	Low-quality	3.43	0.84	0.955804	0.012897	No	Yes	Temperate	#N/A	unknown	CWS2
k141_603458_flag=0_multi=14.9760_len=12955	12955	No	NA	Low-quality	23.58	0.973	0.999852	0.001907	Yes	Yes	Lytic	#N/A	Autographiviridae	CEW
k141_60431_flag=0_multi=13.8891_len=25227	25227	No	NA	Low-quality	15.13	0.907	0.999066	0.003456	Yes	Yes	Lytic	#N/A	Straboviridae	CEW
k141_604700_flag=3_multi=38.8848_len=55967	55967	No	NA	Complete	100	1	0.935551	0.015126	Yes	Yes	Lytic	#N/A	Casjensviridae	CEW
k141_605371_flag=0_multi=15.4455_len=12791	12791	No	NA	Low-quality	31.64	1	0.999709	0.002285	Yes	Yes	Lytic	#N/A	unknown	CWW
k141_605747_flag=1_multi=10.0480_len=17147	17147	No	NA	Low-quality	32.27	1	0.9884	0.007818	Yes	Yes	Lytic	#N/A	Mesyanzhinovviridae	CEW
k141_60583_flag=1_multi=13.0000_len=11438	11438	No	NA	Low-quality	20.37	0.807	0.947462	0.014031	No	Yes	Lytic	#N/A	unknown	CEW
k141_606479_flag=0_multi=10.5311_len=10698	10698	No	NA	Low-quality	25.79	1	0.994582	0.006194	Yes	Yes	Lytic	#N/A	unknown	CWW
k141_607973_flag=0_multi=11.9771_len=10710	10710	No	NA	Low-quality	24.6	0.947	0.565918	0.046284	Yes	No	Lytic	#N/A	unknown	CWW
k141_608307_flag=0_multi=22.9953_len=207466	207466	No	NA	Complete	100	1	0.738601	0.030006	Yes	No	Lytic	#N/A	Kyanoviridae	CEW
k141_608472_flag=1_multi=10.0000_len=24245	24245	No	NA	Low-quality	2.46	0	0.902217	0.017543	No	Yes	Lytic	#N/A	unknown	CWW
k141_6085_flag=0_multi=19.8027_len=10892	10892	No	NA	Low-quality	14.2	1	0.933859	0.015258	Yes	Yes	Lytic	#N/A	Casjensviridae	CEW
k141_608974_flag=1_multi=24.0269_len=13893	13893	No	NA	High-quality	90.43	1	0.835585	0.022547	Yes	No	Lytic	#N/A	unknown	CEW
k141_609246_flag=1_multi=10.0000_len=21130	21130	No	NA	Low-quality	19.56	0.993	0.999999	0.000397	Yes	Yes	Lytic	#N/A	unknown	CWW
k141_609497_flag=1_multi=12.0000_len=27917	27917	No	NA	Medium-quality	75.44	0.993	0.724861	0.031064	Yes	No	Temperate	#N/A	unknown	CEW
k141_61009_flag=0_multi=9.9851_len=13436	13436	No	NA	Low-quality	16.1	0.993	0.581565	0.044339	Yes	No	Lytic	#N/A	unknown	CEW
k141_610372_flag=1_multi=13.1365_len=11390	11390	No	NA	Low-quality	4.57	0.973	1	0	Yes	Yes	Lytic	#N/A	Kyanoviridae	CWS7
k141_611134_flag=0_multi=27.1651_len=10279	10279	No	NA	Low-quality	23.24	1	0.999917	0.00153	Yes	Yes	Lytic	#N/A	unknown	CWW
k141_611202_flag=0_multi=10.9823_len=12540	12540	No	NA	Low-quality	32.4	0.787	0.994597	0.006194	No	Yes	Lytic	#N/A	unknown	CEW
k141_611389_flag=0_multi=37.6546_len=24100	24100	No	NA	Low-quality	12.79	0.987	0.995589	0.005873	Yes	Yes	Lytic	Myoviridae	Kyanoviridae	CEW
k141_61277_flag=0_multi=5.9681_len=10302	10302	No	NA	Low-quality	16.45	1	0.999459	0.002965	Yes	Yes	Lytic	#N/A	Drexlerviridae	CEW
k141_613840_flag=0_multi=16.0000_len=56020	56020	No	NA	Low-quality	44.27	1	0.996803	0.005382	Yes	Yes	Lytic	#N/A	unknown	CWW
k141_614189_flag=0_multi=23.0000_len=65622	65622	No	NA	Low-quality	44.83	1	0.934501	0.015201	Yes	Yes	Lytic	#N/A	Kyanoviridae	CWW
k141_616717_flag=1_multi=11.5850_len=10552	10552	No	NA	Low-quality	7.63	0.88	0.977064	0.00965	No	Yes	Lytic	#N/A	unknown	CEW
k141_6178_flag=1_multi=16.6497_len=17725	17725	No	NA	Low-quality	10.97	0.973	0.57265	0.045302	Yes	No	Lytic	#N/A	unknown	CEW
k141_618317_flag=0_multi=17.1390_len=12813	12813	No	NA	Low-quality	30.11	0.987	0.220649	0.140211	Yes	No	Lytic	#N/A	Autographiviridae	CWW
k141_619564_flag=0_multi=6.7864_len=10239	10239	No	NA	Low-quality	6.11	0.993	0.998856	0.003777	Yes	Yes	Lytic	Myoviridae	Kyanoviridae	CEW
k141_62115_flag=0_multi=10.0821_len=11069	11069	No	NA	Low-quality	17.52	0.92	0.997227	0.005099	Yes	Yes	Lytic	#N/A	unknown	CEW
k141_621489_flag=0_multi=18.9956_len=90645	90645	No	NA	Medium-quality	87.3	0.987	0.9848	0.008573	Yes	Yes	Lytic	#N/A	Straboviridae	CWW
k141_623257_flag=1_multi=21.0000_len=14102	14102	No	NA	Low-quality	19.87	1	0.542387	0.050098	Yes	No	Lytic	#N/A	unknown	CES5
k141_623387_flag=0_multi=14.7412_len=15287	15287	No	NA	Low-quality	36.8	0.987	0.952544	0.013332	Yes	Yes	Lytic	#N/A	unknown	CWW
k141_62432_flag=1_multi=8.6831_len=16096	16096	No	NA	Medium-quality	50.28	1	0.999653	0.002455	Yes	Yes	Lytic	#N/A	unknown	CWW
k141_625481_flag=1_multi=16.2231_len=21418	21418	No	NA	Medium-quality	63.07	1	0.987742	0.007874	Yes	Yes	Lytic	#N/A	unknown	CEW
k141_626417_flag=1_multi=9.0000_len=13598	13598	No	NA	Low-quality	22.68	1	0.097573	0.190951	Yes	No	Lytic	#N/A	Mesyanzhinovviridae	CEW
k141_627513_flag=1_multi=8.0000_len=10993	10993	No	NA	Low-quality	30.49	1	0.781621	0.026683	Yes	No	Lytic	#N/A	Autographiviridae	CWW
k141_628702_flag=1_multi=9.7668_len=14517	14517	No	NA	Low-quality	8.56	1	0.988098	0.007856	Yes	Yes	Lytic	Myoviridae	Kyanoviridae	CWW
k141_629925_flag=0_multi=12.9878_len=21836	21836	No	NA	Low-quality	35.86	1	0.917442	0.016467	Yes	Yes	Lytic	#N/A	unknown	CWW
k141_630599_flag=1_multi=9.9253_len=17520	17520	No	NA	Low-quality	9.69	0.907	0.69036	0.033953	Yes	No	Lytic	#N/A	unknown	CES5
k141_634886_flag=0_multi=12.0000_len=11537	11537	No	NA	Medium-quality	76.66	1	0.959793	0.012388	Yes	Yes	Lytic	#N/A	unknown	CEW
k141_636920_flag=1_multi=11.0000_len=21070	21070	No	NA	Low-quality	6.34	0	0.912031	0.016882	No	Yes	Lytic	#N/A	unknown	CWW
k141_637471_flag=0_multi=16.9684_len=11293	11293	No	NA	Low-quality	34.61	1	0.621074	0.039958	Yes	No	Lytic	#N/A	Peduoviridae	CEW
k141_637558_flag=1_multi=12.2394_len=10694	10694	No	NA	Low-quality	19.05	0.933	0.997071	0.005231	Yes	Yes	Lytic	#N/A	unknown	CEW
k141_638047_flag=0_multi=13.0000_len=10433	10433	No	NA	Low-quality	27.58	1	0.508941	0.057519	Yes	No	Lytic	#N/A	Peduoviridae	CWW
k141_638921_flag=1_multi=9.0000_len=10113	10113	No	NA	Low-quality	27.89	1	0.829187	0.023038	Yes	No	Lytic	#N/A	unknown	CEW
k141_640097_flag=0_multi=8.5130_len=18686	18686	No	NA	Low-quality	12.03	0.593	0.991792	0.007044	No	Yes	Lytic	#N/A	Kyanoviridae	CEW
k141_640535_flag=0_multi=42.0000_len=31743	31743	No	NA	Low-quality	19.17	0.993	0.820595	0.02368	Yes	No	Lytic	#N/A	Drexlerviridae	CWW
k141_642708_flag=1_multi=9.0000_len=10347	10347	No	NA	Low-quality	16.9	0.933	0.764273	0.028288	Yes	No	Lytic	#N/A	unknown	CEW
k141_643462_flag=0_multi=8.9707_len=12160	12160	No	NA	Low-quality	30.27	1	0.999664	0.002436	Yes	Yes	Lytic	#N/A	unknown	CWW
k141_643661_flag=0_multi=11.9890_len=22080	22080	No	NA	Medium-quality	57.4	1	0.929831	0.015579	Yes	Yes	Lytic	#N/A	unknown	CEW
k141_645282_flag=0_multi=19.9660_len=11456	11456	No	NA	Low-quality	34.56	1	0.992271	0.006874	Yes	Yes	Lytic	#N/A	unknown	CEW
k141_645616_flag=1_multi=19.9755_len=13309	13309	No	NA	Low-quality	19.07	1	0.887271	0.018751	Yes	No	Lytic	#N/A	unknown	CEW
k141_646570_flag=0_multi=17.8603_len=47557	47557	No	NA	Low-quality	44.95	1	0.551816	0.048285	Yes	No	Lytic	#N/A	Demerecviridae	CWW
k141_646846_flag=1_multi=15.9567_len=12971	12971	No	NA	Low-quality	21.24	0.953	0.493761	0.067433	Yes	No	Lytic	#N/A	unknown	CWW
k141_649143_flag=0_multi=23.5289_len=11815	11815	No	NA	Low-quality	5.84	1	0.999916	0.00153	Yes	Yes	Lytic	#N/A	unknown	CWW
k141_651740_flag=1_multi=6.0000_len=11684	11684	No	NA	Low-quality	4.52	0.993	0.620822	0.039977	Yes	No	Lytic	#N/A	Demerecviridae	CEW
k141_652207_flag=0_multi=22.9047_len=10337	10337	No	NA	Low-quality	5.28	0.98	0.765916	0.02808	Yes	No	Lytic	#N/A	unknown	CWW
k141_652283_flag=0_multi=11.3852_len=10717	10717	No	NA	Low-quality	26.79	1	0.997656	0.004929	Yes	Yes	Lytic	#N/A	unknown	CWW
k141_652923_flag=0_multi=10.6365_len=19408	19408	No	NA	Low-quality	8.2	0.92	0.999672	0.002436	Yes	Yes	Lytic	Myoviridae	Kyanoviridae	CEW
k141_653611_flag=1_multi=8.0000_len=10029	10029	No	NA	Low-quality	24.79	1	0.857903	0.02098	Yes	No	Lytic	#N/A	unknown	CWW
k141_656539_flag=0_multi=8.9519_len=16952	16952	No	NA	Low-quality	10.17	0.54	0.972322	0.010424	No	Yes	Lytic	#N/A	unknown	CEW
k141_657017_flag=0_multi=17.9442_len=13555	13555	No	NA	Low-quality	14.68	1	0.999367	0.00304	Yes	Yes	Lytic	#N/A	Autographiviridae	CWS7
k141_657861_flag=1_multi=12.0000_len=10008	10008	No	NA	Low-quality	23.58	0.98	0.625727	0.039599	Yes	No	Lytic	#N/A	Autographiviridae	CEW
k141_660112_flag=0_multi=10.9740_len=17059	17059	No	NA	Medium-quality	76.54	0.913	0.947914	0.013974	Yes	Yes	Lytic	#N/A	unknown	CWW
k141_660260_flag=3_multi=14.0003_len=52402	52402	No	NA	Complete	100	0.993	0.955846	0.012897	Yes	Yes	Lytic	#N/A	Mesyanzhinovviridae	CWW
k141_661131_flag=0_multi=13.2097_len=13669	13669	No	NA	Low-quality	32.36	1	0.738354	0.030025	Yes	No	Lytic	#N/A	unknown	CEW
k141_662155_flag=0_multi=9.5981_len=15619	15619	Yes	6789	Low-quality	4.06	0.727	0.998809	0.00389	No	Yes	Temperate	#N/A	Kyanoviridae	CEW
k141_663361_flag=1_multi=13.7709_len=16065	16065	No	NA	Low-quality	19.27	0.993	0.783946	0.026607	Yes	No	Lytic	#N/A	unknown	CEW
k141_663991_flag=0_multi=22.7460_len=19301	19301	No	NA	Low-quality	27.47	0.987	0.283439	0.123801	Yes	No	Lytic	#N/A	unknown	CEW
k141_664441_flag=1_multi=16.4492_len=82748	82748	No	NA	Low-quality	38.18	1	0.998333	0.0044	Yes	Yes	Lytic	Myoviridae	Kyanoviridae	CES7
k141_664628_flag=0_multi=12.0000_len=12908	12908	No	NA	Low-quality	7.14	0.953	0.806267	0.024756	Yes	No	Lytic	#N/A	unknown	CES8
k141_664787_flag=1_multi=8.0000_len=17221	17221	No	NA	Medium-quality	50.55	1	0.996417	0.005552	Yes	Yes	Lytic	#N/A	unknown	CEW
k141_664809_flag=1_multi=9.9244_len=30618	30618	No	NA	Low-quality	20.4	0.993	0.606337	0.041619	Yes	No	Lytic	#N/A	Straboviridae	CEW
k141_66508_flag=1_multi=14.0000_len=22317	22317	No	NA	Low-quality	35.99	1	0.942259	0.014521	Yes	Yes	Lytic	#N/A	unknown	CEW
k141_666716_flag=0_multi=10.6628_len=20384	20384	No	NA	Low-quality	11.15	1	0.999923	0.001492	Yes	Yes	Lytic	#N/A	Kyanoviridae	CEW
k141_667147_flag=1_multi=9.1765_len=10874	10874	No	NA	Low-quality	2.99	1	0.827459	0.023189	Yes	No	Lytic	#N/A	Ackermannviridae	CEW
k141_668498_flag=0_multi=16.9374_len=11387	11387	No	NA	Medium-quality	71.08	0.993	0.837231	0.022509	Yes	No	Lytic	#N/A	unknown	CEW
k141_670288_flag=1_multi=12.0000_len=12136	12136	No	NA	Low-quality	15.66	0.86	0.99988	0.001775	No	Yes	Lytic	#N/A	unknown	CEW
k141_673099_flag=1_multi=9.0000_len=11715	11715	No	NA	Not-determined	NA	0	0.902933	0.017524	No	Yes	Lytic	#N/A	unknown	CEW
k141_67373_flag=0_multi=50.9081_len=12114	12114	No	NA	Low-quality	10.53	1	0.810345	0.024416	Yes	No	Lytic	#N/A	unknown	CEW
k141_67452_flag=1_multi=12.9862_len=19295	19295	No	NA	Low-quality	12.16	0.807	0.973856	0.010065	No	Yes	Lytic	#N/A	unknown	CEW
k141_684699_flag=0_multi=32.9709_len=24311	24311	No	NA	Medium-quality	58.97	1	0.859636	0.020847	Yes	No	Lytic	#N/A	unknown	CEW
k141_685653_flag=1_multi=12.8522_len=20608	20608	No	NA	Low-quality	8.63	1	0.993279	0.006685	Yes	Yes	Lytic	Myoviridae	Kyanoviridae	CEW
k141_68696_flag=1_multi=10.8524_len=18586	18586	Yes	13245	Low-quality	3.78	0.807	0.996433	0.005533	No	Yes	Temperate	Myoviridae	Straboviridae	CEW
k141_687351_flag=0_multi=12.0000_len=18239	18239	No	NA	Low-quality	17.26	0.96	0.697195	0.033311	Yes	No	Lytic	#N/A	Demerecviridae	CEW
k141_695702_flag=1_multi=7.0000_len=11560	11560	No	NA	Low-quality	10.87	0.993	0.461815	0.080482	Yes	No	Lytic	#N/A	Demerecviridae	CEW
k141_697210_flag=0_multi=21.1836_len=11643	11643	No	NA	Low-quality	10.42	0.993	0.952969	0.013294	Yes	Yes	Lytic	#N/A	unknown	CEW
k141_69744_flag=1_multi=8.0000_len=12291	12291	No	NA	Low-quality	7.22	1	0.320551	0.114378	Yes	No	Lytic	#N/A	Kyanoviridae	CEW
k141_698154_flag=0_multi=19.7817_len=12253	12253	No	NA	Low-quality	21.59	0.993	0.982637	0.008951	Yes	Yes	Lytic	#N/A	unknown	CEW
k141_700940_flag=0_multi=16.0000_len=21005	21005	No	NA	Low-quality	14.34	0.953	0.960504	0.012312	Yes	Yes	Lytic	#N/A	unknown	CEW
k141_703676_flag=0_multi=20.7135_len=10179	10179	No	NA	Low-quality	4.83	0.993	1	0	Yes	Yes	Lytic	#N/A	Kyanoviridae	CES9
k141_70702_flag=0_multi=34.5685_len=28294	28294	No	NA	Low-quality	11.35	1	0.999824	0.002002	Yes	Yes	Lytic	Myoviridae	Kyanoviridae	CEW
k141_709087_flag=1_multi=8.8333_len=12427	12427	No	NA	Low-quality	6.57	1	0.987058	0.008026	Yes	Yes	Lytic	#N/A	unknown	CEW
k141_709412_flag=0_multi=11.4719_len=13081	13081	No	NA	Low-quality	33.18	1	0.434365	0.08779	Yes	No	Lytic	#N/A	unknown	CEW
k141_710067_flag=1_multi=9.0000_len=10304	10304	No	NA	Low-quality	8.99	0.987	0.761829	0.028571	Yes	No	Lytic	#N/A	unknown	CES9
k141_713131_flag=0_multi=7.0000_len=10200	10200	No	NA	Low-quality	5.69	0.953	0.984427	0.008611	Yes	Yes	Lytic	#N/A	Kyanoviridae	CEW
k141_714377_flag=1_multi=8.0000_len=13819	13819	No	NA	Low-quality	3.79	0.78	0.998481	0.004268	No	Yes	Lytic	#N/A	Kyanoviridae	CEW
k141_717373_flag=0_multi=15.9468_len=12558	12558	No	NA	Low-quality	7.76	0	0.991963	0.006949	No	Yes	Lytic	#N/A	unknown	CEW
k141_717944_flag=0_multi=92.6327_len=16158	16158	No	NA	Low-quality	33.44	0.993	0.961992	0.012086	Yes	Yes	Lytic	#N/A	unknown	CEW
k141_73258_flag=0_multi=9.7519_len=10662	10662	No	NA	Low-quality	29.04	0.987	0.864423	0.020564	Yes	No	Lytic	#N/A	unknown	CEW
k141_7446_flag=0_multi=12.9732_len=14823	14823	No	NA	Low-quality	6.75	1	0.998955	0.003701	Yes	Yes	Lytic	Myoviridae	Kyanoviridae	CEW
k141_74509_flag=1_multi=11.0000_len=15397	15397	No	NA	Low-quality	15.09	0.967	0.969872	0.010877	Yes	Yes	Lytic	#N/A	unknown	CES1
k141_74912_flag=0_multi=13.9919_len=35395	35395	No	NA	Low-quality	21.32	1	0.982757	0.008913	Yes	Yes	Lytic	#N/A	Kyanoviridae	CEW
k141_751519_flag=0_multi=11.0000_len=10714	10714	No	NA	Not-determined	NA	0	0.90466	0.017373	No	Yes	Lytic	#N/A	unknown	CES9
k141_75345_flag=0_multi=6.4477_len=10077	10077	No	NA	Not-determined	NA	0.833	0.999988	0.000718	No	Yes	Lytic	#N/A	unknown	CWW
k141_76548_flag=0_multi=21.9826_len=53106	53106	No	NA	High-quality	100	1	0.999993	0.000623	Yes	Yes	Lytic	#N/A	unknown	CEW
k141_76899_flag=1_multi=12.7126_len=10704	10704	No	NA	Low-quality	6.42	0.953	0.99938	0.003021	Yes	Yes	Lytic	#N/A	unknown	CEW
k141_768996_flag=0_multi=17.0000_len=31376	31376	No	NA	Medium-quality	57.54	0.987	0.85704	0.021017	Yes	No	Lytic	#N/A	unknown	CES9
k141_77636_flag=1_multi=10.9782_len=22771	22771	Yes	16231	Low-quality	6.36	0.967	0.757511	0.028835	Yes	No	Temperate	#N/A	Kyanoviridae	CEW
k141_78913_flag=0_multi=14.4036_len=19959	19959	No	NA	Low-quality	7.67	0.967	0.953234	0.013275	Yes	Yes	Lytic	#N/A	unknown	CWW
k141_81271_flag=1_multi=8.9920_len=22030	22030	No	NA	Low-quality	44.01	0.953	0.962027	0.012086	Yes	Yes	Lytic	#N/A	unknown	CEW
k141_81929_flag=0_multi=8.6751_len=11023	11023	No	NA	Low-quality	4.8	0.92	0.819589	0.023756	Yes	No	Lytic	#N/A	unknown	CWW
k141_82799_flag=1_multi=12.0000_len=15383	15383	No	NA	Low-quality	6.81	1	0.999956	0.001095	Yes	Yes	Lytic	Myoviridae	Kyanoviridae	CEW
k141_82948_flag=0_multi=14.9884_len=26621	26621	No	NA	Low-quality	16.75	1	0.886747	0.01877	Yes	No	Lytic	#N/A	Straboviridae	CEW
k141_83693_flag=0_multi=12.5941_len=33343	33343	No	NA	Low-quality	34.21	1	0.965876	0.0115	Yes	Yes	Lytic	#N/A	Kyanoviridae	CWW
k141_84213_flag=0_multi=21.0245_len=18289	18289	No	NA	Low-quality	30.29	1	0.656758	0.036559	Yes	No	Lytic	#N/A	Kyanoviridae	CWW
k141_8431_flag=1_multi=10.0000_len=10413	10413	No	NA	Low-quality	12.75	1	0.40511	0.095041	Yes	No	Lytic	#N/A	unknown	CEW
k141_84428_flag=0_multi=14.6590_len=14686	14686	No	NA	Low-quality	42.19	1	0.999512	0.002908	Yes	Yes	Lytic	#N/A	unknown	CEW
k141_85180_flag=0_multi=21.9781_len=42310	42310	No	NA	Low-quality	35.51	1	0.952151	0.013351	Yes	Yes	Temperate	#N/A	unknown	CEW
k141_85985_flag=0_multi=19.1449_len=13670	13670	No	NA	Low-quality	21.82	0.9	0.975278	0.009876	No	Yes	Lytic	#N/A	Autographiviridae	CWW
k141_86163_flag=1_multi=9.0000_len=11842	11842	No	NA	Low-quality	12.37	0.973	0.99946	0.002965	Yes	Yes	Lytic	#N/A	unknown	CWW
k141_87798_flag=1_multi=13.0000_len=12871	12871	No	NA	Low-quality	1.24	0	0.96058	0.012312	No	Yes	Lytic	#N/A	unknown	CWW
k141_8857_flag=1_multi=9.0000_len=12008	12008	No	NA	Not-determined	NA	0.873	0.976989	0.009668	No	Yes	Lytic	#N/A	unknown	CES8
k141_893903_flag=1_multi=6.7786_len=14236	14236	No	NA	Low-quality	6.9	0.927	0.458938	0.081313	Yes	No	Lytic	#N/A	unknown	CES9
k141_898427_flag=0_multi=21.3783_len=77119	77119	No	NA	Medium-quality	83.49	0.987	0.999633	0.00253	Yes	Yes	Lytic	#N/A	Autographiviridae	CES9
k141_9041_flag=0_multi=27.3188_len=11976	11976	No	NA	Low-quality	12.43	1	0.999999	0.000415	Yes	Yes	Lytic	Myoviridae	unknown	CWW
k141_904528_flag=1_multi=11.0000_len=16119	16119	No	NA	Low-quality	9.93	0.907	0.712235	0.032083	Yes	No	Lytic	#N/A	unknown	CES9
k141_91162_flag=1_multi=9.6125_len=12519	12519	No	NA	Low-quality	11.8	1	0.998632	0.004117	Yes	Yes	Lytic	#N/A	Demerecviridae	CWW
k141_91182_flag=0_multi=17.9685_len=14978	14978	No	NA	Low-quality	41.07	1	0.997657	0.004929	Yes	Yes	Lytic	#N/A	unknown	CEW
k141_93040_flag=0_multi=11.8189_len=29370	29370	No	NA	Low-quality	25.93	1	0.999452	0.002965	Yes	Yes	Lytic	#N/A	Straboviridae	CWW
k141_93930_flag=1_multi=18.0000_len=16385	16385	No	NA	Low-quality	7.28	1	0.96231	0.012029	Yes	Yes	Lytic	Myoviridae	Kyanoviridae	CES7
k141_9458_flag=0_multi=13.9190_len=25670	25670	No	NA	Low-quality	14.49	1	0.986422	0.008233	Yes	Yes	Lytic	#N/A	Kyanoviridae	CEW
k141_9497_flag=1_multi=9.0000_len=14737	14737	Yes	10168	Low-quality	8.75	0.973	0.842478	0.022037	Yes	No	Temperate	#N/A	unknown	CWS9
k141_951_flag=0_multi=13.7128_len=17395	17395	No	NA	Medium-quality	50.04	1	0.918414	0.016429	Yes	Yes	Lytic	#N/A	unknown	CEW
k141_95362_flag=0_multi=59.8241_len=12010	12010	No	NA	Low-quality	25.13	1	0.554449	0.047757	Yes	No	Lytic	#N/A	Drexlerviridae	CWW
k141_95816_flag=0_multi=11.1762_len=10037	10037	No	NA	Low-quality	25.32	0.793	0.999997	0.000491	No	Yes	Lytic	#N/A	unknown	CWW
k141_96836_flag=1_multi=8.0000_len=14343	14343	No	NA	Low-quality	9.65	0.987	0.600431	0.04228	Yes	No	Lytic	#N/A	unknown	CEW
k141_99808_flag=0_multi=12.1237_len=12309	12309	No	NA	Low-quality	21.71	0.993	0.997935	0.004645	Yes	Yes	Lytic	#N/A	unknown	CEW

## Sheet: S6
Contig	Taxonomy	Lifestyle	CES1	CES2	CES3	CES4	CES5	CES6	CES7	CES8	CES9	CWS1	CWS2	CWS3	CWS4	CWS5	CWS6	CWS7	CWS8	CWS9	CEW	CWW
k141_233455_flag=0_multi=15.1703_len=15838	Peduoviridae	Lytic	2164.3	1443.68	898.235	205.13	109.322	91.9267	24.6508	26.6609	49.2338	1226.17	929.72	505.455	423.663	260.474	150.54	77.1358	129.457	88.1658	48.2186	24.9014
k141_74509_flag=1_multi=11.0000_len=15397	unknown	Lytic	1654.72	1463.41	896.586	150.978	2.44463	27.017	0	16.8767	39.7916	2006.44	782.468	441.066	491.313	82.8482	23.8234	27.2749	15.1933	4.85845	52.2765	55.4544
k141_582916_flag=0_multi=19.9838_len=25958	unknown	Lytic	56.1926	287.204	560.228	1789.97	2844.97	1537.69	47.1959	24.1918	9.8088	8.35906	89.3863	228.7	632.239	476.777	37.3459	4.41221	5.30112	3.84239	0.0622647	0
k141_584404_flag=0_multi=12.9861_len=19083	Salasmaviridae	Lytic	17.8353	111.621	259.542	1248.98	1938.9	1051.28	40.9181	23.2621	11.6748	2.84264	42.0886	261.601	414.33	315.739	24.7137	2.0006	15.8641	0	0.0846967	0
k141_164791_flag=0_multi=11.4280_len=13656	unknown	Lytic	48.0661	187.664	474.579	1335.15	2014.85	938.766	28.5896	29.3352	3.49595	0	22.8725	85.6274	287.929	220.608	38.3724	1.39783	18.1379	8.21677	0.887669	0.357282
k141_349629_flag=1_multi=11.1235_len=14139	unknown	Lytic	24.0718	138.882	398.742	1440.08	1751.69	870.589	58.0825	7.6576	4.50203	0	78.8969	89.064	305.298	322.487	51.8861	21.6012	3.89296	7.05429	1.14313	1.03523
k141_376375_flag=0_multi=18.8611_len=27114	Mesyanzhinovviridae	Lytic	54.6934	228.314	373.108	1687.83	2092.73	1252.46	32.7706	16.372	10.8579	0	3.29136	0	31.5252	26.0256	0	1.40803	0	0	0.536491	0
k141_277305_flag=1_multi=7.0000_len=10124	unknown	Lytic	33.6182	180.811	499.627	1239.36	1152.55	580.844	41.2234	27.8056	0	16.0745	17.6298	44.4233	42.2152	45.5741	0	0	4.07763	2.46298	1.11753	0.803213
k141_623257_flag=1_multi=21.0000_len=14102	unknown	Lytic	79.3005	162.848	403.524	1964.2	2390.2	1423.95	32.4588	25.3364	7.335	0	12.6566	28.7028	6.06137	19.246	7.43175	0	0	0	0	0
k141_545224_flag=0_multi=15.0000_len=10426	unknown	Lytic	51.2984	137.266	399.242	1238.38	2440.5	1944.14	315.069	25.9617	6.8685	36.4208	68.4764	60.3911	163.97	117.143	0	16.4779	10.5587	0	1.78276	0.311979
k141_124340_flag=0_multi=18.9801_len=20086	unknown	Lytic	58.0961	203.81	372.496	1585.4	2763.13	1291.55	46.2476	34.4983	15.4493	8.10208	82.1953	228.386	572.374	451.309	13.0442	10.4538	5.48069	3.72426	0	0.242907
k141_362930_flag=0_multi=16.9670_len=10811	unknown	Lytic	35.9793	129.299	331.413	1494.79	2188.21	1175.32	63.5094	31.0461	19.8717	5.01768	123.821	216.322	411.139	426.78	41.1998	3.53135	7.63703	2.30646	0	0
k141_257809_flag=1_multi=11.0000_len=19220	unknown	Lytic	51.8596	169.702	378.314	1366.85	1692.04	883.434	50.4328	23.0963	14.0755	11.2895	51.075	67.859	320.207	326.197	57.2543	7.94535	8.59145	3.24339	0.756837	0.592321
k141_630599_flag=1_multi=9.9253_len=17520	unknown	Lytic	41.6281	184.268	511.26	1477.1	1515.7	738.198	31.5053	13.5957	2.27077	12.385	66.2183	87.2786	87.8192	12.393	20.9366	0	7.06883	0	0.0922527	0.0928279
k141_511005_flag=1_multi=14.0000_len=25689	unknown	Lytic	31.2296	125.672	276.894	1035.73	2097.46	2027.8	280.9	34.9818	24.1593	0	38.2133	49.02	207.962	188.059	41.8166	8.91683	7.49928	1.94131	0	0.189927
k141_454637_flag=1_multi=13.8701_len=21559	Mesyanzhinovviridae	Lytic	37.2121	145.115	422.809	1457.59	1955.41	1138.41	13.7381	9.03973	3.6907	0	12.4183	12.5166	23.7889	15.1069	0	5.3125	0	0	0.224908	0
k141_174810_flag=1_multi=13.0000_len=31232	unknown	Lytic	68.4986	222.72	450.441	2527.94	2780.94	1752.06	49.1404	18.72	16.8144	5.21063	20.0017	0	15.0527	26.0701	3.35562	0	0	0	0.155251	0.104146
k141_491888_flag=1_multi=11.0000_len=16172	Kyanoviridae	Lytic	21.0457	37.0444	3.25809	58.8825	94.2629	215.132	1363.59	231.645	31.4886	11.7401	11.0366	8.34296	21.1421	16.7825	34.0226	76.7231	43.3956	31.6084	3.69787	8.69892
k141_93930_flag=1_multi=18.0000_len=16385	Kyanoviridae	Lytic	83.0884	83.2819	77.1776	247.852	240.06	426.979	2372.11	472.466	84.0112	62.9036	35.4026	60.3864	52.1681	97.7298	243.058	198.052	178.044	73.0478	25.4499	25.1123
k141_151127_flag=0_multi=15.8315_len=60522	Kyanoviridae	Lytic	24.1011	63.7908	34.8236	105.972	214.252	397.085	2198.86	444.912	85.5865	43.4707	67.8287	17.8345	68.4983	56.5039	186.585	226.143	127.098	77.0443	7.98493	13.8122
k141_664441_flag=1_multi=16.4492_len=82748	Kyanoviridae	Lytic	45.2441	72.3983	68.1323	138.771	196.733	337.5	2235.6	427.467	96.926	48.5113	40.4429	49.4592	40.2864	56.0867	257.105	194.237	149.334	95.5243	8.75052	14.5932
k141_323951_flag=1_multi=14.0000_len=19189	Schitoviridae	Lytic	0	17.3445	10.9833	103.628	126.519	333.055	566.181	988.537	406.775	5.65388	0	18.75	164.816	738.311	753.7	903.254	517.754	284.58	0	0
k141_326233_flag=1_multi=13.0000_len=10854	Kyanoviridae	Lytic	13.4388	33.73	29.1265	90.3128	117.907	250.856	1448.73	201.499	32.2552	22.4901	32.8881	41.4355	59.064	35.0074	113.454	117.832	49.444	43.6492	7.96668	12.062
k141_33167_flag=1_multi=10.0000_len=19883	unknown	Lytic	0	0	10.6	78.8819	79.5091	136.94	233.599	913.193	144.065	0	0	2.26194	30.0931	443.632	897.382	333.138	20.0703	8.77867	0	0
k141_427788_flag=1_multi=10.0000_len=10114	unknown	Lytic	0	0	0	66.4598	98.6216	170.126	190.347	567.367	423.25	0	0	0	0	5.36696	25.9053	71.7195	53.0616	30.8176	0	0
k141_120128_flag=1_multi=9.8481_len=11711	unknown	Lytic	0	0	26.995	59.7884	168.739	190.519	393.157	796.014	517.724	0	0	0	21.8967	183.086	503.385	1015.48	423.007	373.676	0	0
k141_8857_flag=1_multi=9.0000_len=12008	unknown	Lytic	0	0	17.5516	86.2982	68.9607	177.934	293.741	790.752	204.088	0	0	14.9814	35.5919	171.777	288.015	778.936	289.927	212.846	0	0
k141_262464_flag=0_multi=17.2718_len=13976	Kyanoviridae	Lytic	0	11.9069	30.1602	206.407	141.392	169.113	584.709	1242.6	851.129	3.88138	0	6.43591	149.842	751.535	1346.03	1791.96	1738.79	1372.9	0	0
k141_517274_flag=1_multi=10.0000_len=14408	Kyanoviridae	Lytic	0	6.92996	3.65698	48.5968	69.2295	114.174	663.42	828.864	441.798	0	6.19391	0	59.3263	290.094	481.897	564.394	595.009	502.753	0	0
k141_435936_flag=1_multi=7.0000_len=12544	unknown	Lytic	13.5663	50.4116	163.816	140.662	43.5092	129.632	120.203	599.011	125.593	21.6223	49.8002	10.7559	20.4426	95.2002	96.0802	211.522	259.987	144.117	1.99714	2.20407
k141_215197_flag=0_multi=12.7482_len=23654	unknown	Lytic	4.11107	0	13.3651	111.3	125.711	218.227	347.753	1115.48	322.927	0	0	0	7.22731	20.6533	97.4743	275.993	93.0795	29.5166	0	0
k141_664628_flag=0_multi=12.0000_len=12908	unknown	Lytic	0	15.4705	0	69.4324	99.1446	203.614	295.163	1048.49	277.39	0	0	0	0	58.8736	75.1026	353.44	79.9542	23.1811	0	0
k141_22303_flag=1_multi=12.8790_len=17797	unknown	Lytic	0	0	0	151.076	166.024	210.363	377.475	1158.33	371.081	0	0	0	0	70.1508	189.913	274.58	81.9592	20.3158	0	0
k141_306773_flag=1_multi=10.0000_len=14891	unknown	Lytic	3.26517	0	7.07673	48.9013	118.802	162.531	233.254	426.801	527.923	0	0	0	5.7402	36.4525	170.671	352.521	698.613	817.999	0	0
k141_192452_flag=0_multi=66.1238_len=30703	Mesyanzhinovviridae	Lytic	0	19.5121	27.4578	249.943	299.129	1001.98	534.95	1006.78	4379.95	0	0	0	5.56802	28.2872	19.6272	41.0336	68.5724	52.7892	0	0
k141_768996_flag=0_multi=17.0000_len=31376	unknown	Lytic	9.29785	8.48605	3.35861	111.579	71.3787	233.219	204.67	459.985	1000.68	0	0	0	8.17288	194.628	457.609	221.452	282.002	489.151	0	0
k141_466119_flag=1_multi=10.0000_len=10376	unknown	Lytic	0	0	0	94.4733	130.594	280.635	193.326	815.996	605.807	0	0	0	24.714	20.9258	5.05024	104.863	55.7004	87.7153	0	0
k141_505635_flag=1_multi=11.0000_len=21262	unknown	Lytic	0	9.39205	0	86.9382	100.907	311.254	227.946	671.155	600.257	0	0	0	0	22.9768	20.9487	108.632	48.5396	38.1146	0	0
k141_123677_flag=1_multi=9.0000_len=11483	unknown	Lytic	0	11.5936	18.354	131.707	155.7	212.415	372.826	396.952	532.161	0	0	7.83317	119.101	380.533	600.084	1208.52	865.208	906.595	0	0
k141_239548_flag=0_multi=8.0000_len=11880	unknown	Lytic	0	0	17.7407	75.4405	212.279	221.233	522.418	443.837	577.335	0	7.51194	30.2856	21.5852	388.377	1184.32	941.581	501.545	593.994	0	0
k141_316278_flag=1_multi=16.0000_len=84211	Guelinviridae	Lytic	0.577378	0	10.6367	99.1102	115.766	250.58	408.146	753.168	888.832	1.28834	0	1.06813	14.2105	67.6818	352.511	565.786	1140.09	1544.77	0	0.0579382
k141_893903_flag=1_multi=6.7786_len=14236	unknown	Lytic	17.077	16.3653	77.7245	324.614	363.55	401.116	839.767	592.462	640.522	11.4315	34.4781	66.3429	249.179	556.694	1516.53	1410.6	659.227	506.2	0	0
k141_703676_flag=0_multi=20.7135_len=10179	Kyanoviridae	Lytic	4.77666	9.80911	10.3527	156.834	122.028	178.327	527.718	894.545	909.1	2.66461	0	44.1833	146.955	605.26	1204.63	1530.25	1488.4	1224.83	0	0
k141_166609_flag=1_multi=16.7084_len=49908	unknown	Lytic	4.87112	8.66935	23.2263	167.231	236.061	428.493	469.907	784.024	1010.14	4.34769	7.15251	44.1559	293.728	1106.66	969.111	1191.42	1016.86	843.863	0	0.228108
k141_550664_flag=1_multi=15.9963_len=13244	unknown	Lytic	0	0	23.8703	38.0649	34.1045	192.737	363.913	330.273	1032.75	0	0	0	0	180.337	193.874	260.877	402.097	323.833	0	0
k141_898427_flag=0_multi=21.3783_len=77119	Autographiviridae	Lytic	5.0438	7.76827	21.1801	168.148	212.069	458.491	748.561	1519.49	665.997	1.40682	6.94318	26.243	261.578	998.786	1124.55	1413.11	939.99	437.147	0.0209581	0.0843551
k141_710067_flag=1_multi=9.0000_len=10304	unknown	Lytic	0	0	30.6812	81.5429	62.1001	75.2366	148.947	198.595	566.025	0	0	0	211.537	1612.01	429.727	1.85255	10.6837	4.8399	0	0
k141_904528_flag=1_multi=11.0000_len=16119	unknown	Lytic	0	0	19.6128	34.7506	58.3783	148.976	178.735	360.029	663.929	0	0	5.58026	0	175.112	297.458	159.872	268.913	361.211	0	0
k141_252878_flag=0_multi=45.9444_len=11520	unknown	Lytic	8.44125	0	4.57377	235.825	194.408	950.336	822.724	1398.5	3078.42	0	0	0	118.719	1008.35	498.085	106.048	22.6955	15.1516	0	0.141176
k141_751519_flag=0_multi=11.0000_len=10714	unknown	Lytic	0	0	0	31.369	35.1316	120.007	197.28	231.417	825.83	0	0	0	3.98905	12.666	29.3455	457.887	1109.69	2330.84	0	0
k141_108427_flag=1_multi=13.0000_len=11364	unknown	Lytic	12.8357	0	18.5462	81.3305	187.14	198.001	611.297	1060.41	885.02	0	0	0	60.1742	417.954	949.9	670.221	251.867	211.743	0.142227	0
k141_492342_flag=1_multi=19.0000_len=65071	unknown	Lytic	14.197	11.764	28.3405	152.366	138.248	378.043	298.34	458.734	1226.57	10.4206	15.086	8.29386	30.2128	140.144	88.5823	232.628	488.499	702.979	0.186289	0.0374901
k141_381588_flag=0_multi=14.0000_len=18863	unknown	Temperate	0	0	22.3463	26.7259	17.959	87.2086	141.315	148.662	873.588	0	0	7.15276	0	58.9922	88.8958	367.343	903.127	3253.22	0	0
k141_421204_flag=1_multi=14.0000_len=10853	unknown	Lytic	0	6.13329	0	30.9672	13.8727	48.782	124.046	103.752	733.141	0	0	0	7.87592	20.0061	60.3535	325.386	644.099	2574.39	0	0
k141_257_flag=1_multi=6.7184_len=11984	unknown	Lytic	111.573	58.3218	17.5867	35.0558	61.2466	52.0671	20.2211	20.7796	21.2464	31.6858	7.44675	71.3041	78.4589	83.7956	41.5397	9.5571	17.2238	8.32282	50.1037	25.717
k141_570573_flag=1_multi=10.0000_len=11341	Ackermannviridae	Lytic	0	8.80406	9.29192	4.93912	4.97839	0	0	0	0	0	3.93448	0	0	0	0	0	1.21335	0	65.4146	5.23425
k141_30304_flag=0_multi=18.4617_len=13657	Kyanoviridae	Lytic	21.3612	56.0513	57.8712	47.1676	2.75609	22.1521	2.95733	6.34229	3.49569	3.97204	26.1381	88.9142	31.2944	5.96194	11.5109	16.7727	0	7.30326	198.054	166.719
k141_120446_flag=0_multi=20.2052_len=11167	Mesyanzhinovviridae	Lytic	21.7702	0	18.8734	20.0643	3.37064	0	4.82234	2.90868	0	24.2886	0	8.05483	0	12.1522	0	1.70939	0	2.23293	163.624	112.724
k141_60431_flag=0_multi=13.8891_len=25227	Straboviridae	Lytic	66.494	68.6043	54.3043	0	1.49205	2.9981	1.06733	1.28756	6.93896	10.7516	3.53755	3.56556	10.165	4.30344	6.23157	12.8635	14.1823	9.3901	72.2377	43.2583
k141_510685_flag=0_multi=19.1283_len=29690	unknown	Lytic	3.27528	4.48397	1.77467	10.3766	2.53553	11.4634	5.44133	8.38743	1.60797	8.22188	6.01158	1.51479	0	5.48482	1.76495	3.21467	10.66	0	141.839	180.684
k141_210534_flag=0_multi=10.9691_len=25064	Autographiviridae	Lytic	145.492	188.561	138.746	24.5835	34.5403	3.77199	1.07427	0	3.49204	115.79	16.0225	14.355	75.028	34.6514	16.7256	1.5232	3.29412	3.97944	69.1608	50.8395
k141_60583_flag=1_multi=13.0000_len=11438	unknown	Lytic	8.50176	26.1882	4.60656	26.9348	24.6809	9.91864	18.8323	20.825	4.86951	14.2279	3.90111	23.592	7.47311	9.49142	9.16267	30.0399	19.249	19.6203	91.1429	57.3728
k141_120655_flag=0_multi=11.9161_len=19992	Kyanoviridae	Lytic	65.6654	88.2334	100.151	128.885	85.6652	155.11	30.9767	50.3661	60.8937	101.752	124.989	155.223	119.716	99.1033	31.4534	47.7409	53.688	56.7502	99.319	44.417
k141_661131_flag=0_multi=13.2097_len=13669	unknown	Lytic	49.799	36.5231	46.2563	16.3917	85.3639	80.231	37.4266	65.7435	54.1357	37.7012	88.1385	65.8046	43.7736	19.8557	103.507	110.323	106.711	44.6932	118.362	83.7028
k141_240911_flag=0_multi=29.3025_len=16969	Drexlerviridae	Lytic	123.209	149.063	344.662	270.682	167.471	298.627	131.7	44.0255	19.6938	38.3613	84.1458	82.1615	62.9658	107.162	106.538	30.3727	37.3027	34.5322	307.366	380.062
k141_150807_flag=1_multi=49.0000_len=36719	Mesyanzhinovviridae	Lytic	14.5657	4.53203	5.73979	0	0	0	0	0	0	27.3306	0	0	4.65576	0	0	0	0	0	158.528	94.8506
k141_951_flag=0_multi=13.7128_len=17395	unknown	Lytic	25.1563	11.48	6.05804	12.8806	2.16384	27.1748	6.19155	3.73455	3.20192	17.1517	20.5213	15.5128	7.37086	9.36156	9.0373	4.38947	9.49283	7.16734	166.551	98.4502
k141_361065_flag=0_multi=10.9111_len=22829	Guelinviridae	Lytic	23.428	40.8211	251.574	38.0317	31.3268	28.1607	2.94861	0.948537	3.48538	38.0191	50.8189	137.903	84.2455	47.5548	2.29538	0	1.20554	1.09226	84.3923	27.8906
k141_30856_flag=0_multi=9.0412_len=19958	Kyanoviridae	Lytic	46.2877	30.0171	50.1607	1.40331	11.3158	14.211	5.39644	2.71247	2.39206	21.7441	13.4145	20.281	14.99	5.43957	1.31279	3.82578	4.13688	0	89.4057	55.0862
k141_61009_flag=0_multi=9.9851_len=13436	unknown	Lytic	14.475	19.8168	7.84308	0	0	0	0	1.61165	0	4.03737	0	0	0	0	0	0	4.09665	0	77.0482	35.1027
k141_150914_flag=0_multi=14.1325_len=52355	unknown	Lytic	86.3682	132.226	58.3709	9.62909	2.15681	0.361154	1.02857	1.24081	5.31921	99.4676	101.421	19.7575	11.4286	3.11039	11.5102	3.64601	14.193	2.14322	96.442	53.0104
k141_361232_flag=0_multi=11.6076_len=18289	unknown	Lytic	73.1091	98.2691	28.8096	55.1294	3.0871	8.27087	2.94445	5.92	3.04541	50.4229	85.3919	51.6407	72.4424	14.8399	10.0281	0	9.0288	2.72679	91.3785	56.0671
k141_301220_flag=1_multi=17.0000_len=34119	Peduoviridae	Lytic	11.4005	7.80382	0	0	0	0	0	0	1.39924	1.58991	0	0	2.50527	0	0	2.2379	0	0	110.233	42.924
k141_91182_flag=0_multi=17.9685_len=14978	unknown	Lytic	6.4924	2.22208	21.1069	41.1377	3.76953	12.624	10.786	0	0	7.24344	0	12.0107	59.9221	21.7445	12.2449	0	1.83745	1.66479	93.3956	99.0271
k141_301222_flag=0_multi=25.7929_len=14994	Kyanoviridae	Lytic	1.62137	4.43942	87.8515	31.7543	5.02067	12.6105	1.79575	1.44419	2.12266	39.7964	29.7592	62.989	25.6535	32.5819	10.4845	0	5.50646	0	164.063	148.436
k141_361345_flag=0_multi=18.9018_len=12973	unknown	Lytic	39.353	51.3101	0	4.31778	0	0	0	0	0	0	0	0	0	4.18419	0	0	6.36429	0	155.049	35.478
k141_61277_flag=0_multi=5.9681_len=10302	Drexlerviridae	Lytic	47.1962	19.384	46.0307	10.8745	10.961	11.0124	7.84086	2.10194	0	13.164	43.3129	43.6557	33.1887	5.26902	12.7163	7.41165	2.67145	2.42042	63.0693	46.4918
k141_421619_flag=1_multi=11.9948_len=46372	Straboviridae	Lytic	39.3192	31.5799	146.575	48.9215	30.4386	19.9798	0.290321	3.96921	4.11806	43.2827	53.8854	113.473	102.303	47.4079	14.6903	4.52807	6.52838	1.3443	97.1392	32.1257
k141_421823_flag=0_multi=17.7925_len=14481	Kyanoviridae	Lytic	35.2549	20.6851	29.1084	19.3407	2.59927	2.61145	7.43747	1.49535	0	41.2062	0	24.8459	0	3.74846	1.80931	1.31819	0.950255	0	91.2436	41.2174
k141_151552_flag=0_multi=27.5803_len=21327	Kyanoviridae	Lytic	20.5183	29.6509	71.6465	38.0837	19.4139	36.3501	13.8876	2.53835	4.10393	29.2507	46.029	124.419	82.1628	49.6314	12.2852	3.5802	8.38788	7.59969	249.371	239.639
k141_572057_flag=1_multi=9.0000_len=19170	unknown	Lytic	0	0	0	0	0	0	0	0	0	0	0	0	0	0	0	0	0	0	57.2902	28.6328
k141_361805_flag=0_multi=23.4774_len=13790	Straboviridae	Lytic	0	0	7.64174	0	0	0	0.976269	0.78514	0	3.93373	0	0	0	0	0	0	0	0	89.721	61.7398
k141_451891_flag=1_multi=11.9413_len=29374	Straboviridae	Lytic	33.1052	36.2577	35.8751	3.81389	0	1.28741	6.41651	5.8975	2.4379	44.3217	18.2288	6.12435	2.90997	4.61986	3.56787	24.6943	11.2431	7.63997	64.7354	48.5844
k141_662155_flag=0_multi=9.5981_len=15619	Kyanoviridae	Temperate	35.7992	42.6177	3.37344	10.7589	2.40988	1.21059	0	0	2.03772	64.2521	68.5641	14.3973	32.8359	6.95069	0	1.22215	1.76204	0	89.2005	121.047
k141_121675_flag=1_multi=10.0000_len=21308	Kyanoviridae	Lytic	2.28185	53.1067	14.8366	0	0	0	2.52727	0	0	0	0	0	0	0	0	0	0	0	60.8338	15.1888
k141_512128_flag=0_multi=17.1059_len=10056	unknown	Lytic	4.83508	6.61939	20.9586	0	1.87152	0	10.7102	4.30671	0.791247	5.3944	4.43725	0	34.0006	0	10.4219	0	1.3684	0	131.153	109.49
k141_422328_flag=1_multi=9.0000_len=10372	Autographiviridae	Lytic	21.095	0	0	13.5014	19.9595	12.7611	7.78794	5.21938	3.8357	2.61503	34.4165	26.0167	0	0	0	0	9.28698	2.40408	40.5937	42.65
k141_62115_flag=0_multi=10.0821_len=11069	unknown	Lytic	76.8703	54.1224	76.162	53.1351	95.2136	70.0368	72.9755	148.678	34.5041	85.7627	104.81	121.892	30.8889	90.7224	87.5801	143.135	111.885	99.1189	98.4888	60.3139
k141_182236_flag=0_multi=14.8754_len=15941	unknown	Lytic	972.981	682.725	237.982	49.1941	4.72241	13.0475	3.37815	9.50876	9.98278	227.996	83.9739	16.9277	115.285	54.4824	4.9308	13.1721	13.8116	10.9495	126.637	42.7986
k141_572562_flag=0_multi=12.9479_len=10280	unknown	Lytic	148.986	158.641	71.7566	13.6222	0	0	5.23843	2.10644	4.64403	129.283	125.876	52.499	66.5194	36.9621	45.8766	16.7119	17.4016	0	90.9543	51.0211
k141_482632_flag=0_multi=17.9840_len=23506	Kyanoviridae	Lytic	41.3695	110.441	33.6232	10.7235	14.4116	0	6.30011	9.21218	10.155	215.775	165.15	99.4918	118.183	46.1852	23.4074	22.7382	8.19574	14.8512	121.808	254.821
k141_572698_flag=1_multi=26.7766_len=16231	Casjensviridae	Lytic	32.9516	24.6065	64.9249	20.7065	39.4233	19.8041	8.29447	3.33531	8.33376	48.4609	16.4947	47.1049	26.3315	10.0329	4.8427	7.05639	8.478	2.3044	281.908	214.328
k141_302581_flag=0_multi=7.7372_len=12186	Kyanoviridae	Lytic	21.9447	60.0862	95.1236	68.9495	67.9534	68.272	30.9336	32.874	29.3825	20.0318	36.6166	44.2877	42.0864	46.7713	58.0516	61.0914	55.3317	26.6008	77.1262	71.935
k141_422693_flag=1_multi=11.9942_len=20676	Straboviridae	Lytic	7.05479	8.04853	10.1934	0	0	0	0	0	0	40.6662	8.63241	45.6789	4.13414	14.4393	0	0	0	0	50.3813	70.4781
k141_392762_flag=0_multi=17.9131_len=38475	Kyanoviridae	Lytic	48.6532	48.4421	13.6946	8.00728	7.33723	1.96577	2.79927	1.68843	1.65443	56.3962	10.4376	4.67567	15.5514	11.992	5.44783	13.3956	1.43061	0.324044	108.381	58.671
k141_242486_flag=0_multi=16.0617_len=79810	Kyanoviridae	Lytic	35.03	60.4678	23.1067	6.66756	0.23581	0.236916	4.72318	2.30623	3.09059	143.075	102.313	57.4785	65.8672	18.3636	20.0256	15.5465	6.8967	11.56	112.871	218.357
k141_32480_flag=0_multi=16.0853_len=12193	unknown	Lytic	43.8643	65.511	43.2132	43.6429	29.3266	6.20298	33.1241	21.3114	4.56799	44.4896	142.723	92.213	52.5777	31.163	53.7207	6.26218	7.89999	15.3378	141.571	39.4815
k141_573072_flag=0_multi=61.7310_len=18988	unknown	Lytic	1684.91	1042.92	499.482	87.025	43.6107	25.8908	7.09014	27.9401	49.447	869.915	91.6482	61.5824	220.581	40.0221	2.75971	53.2811	7.24702	1.31321	439.307	263.891
k141_663361_flag=1_multi=13.7709_len=16065	unknown	Lytic	6.05311	0	6.55958	10.4602	2.34298	3.53095	0	0	0	0	0	33.5941	21.2829	0	3.26183	0	0	1.55214	85.215	26.8274
k141_182961_flag=0_multi=27.8580_len=11742	Straboviridae	Lytic	41.4083	39.6825	26.9238	4.77044	3.20558	0	9.17238	3.68833	2.0329	36.9587	26.6008	3.83019	0	4.62284	0	0	1.17192	7.43256	182.246	119.254
k141_303183_flag=0_multi=12.9842_len=16899	Straboviridae	Lytic	47.4736	17.7253	62.3585	3.31467	0	0	0	0	1.88337	44.9403	44.8876	0	5.05813	0	4.65128	2.25915	14.6572	5.16439	60.4941	35.5604
k141_603458_flag=0_multi=14.9760_len=12955	Autographiviridae	Lytic	176.396	141.299	122.014	108.094	106.049	246.661	260.838	267.438	174.429	125.618	68.8861	17.3578	29.6911	134.08	206.288	350.684	280.418	185.739	116.588	57.2454
k141_122951_flag=1_multi=15.9777_len=39219	Straboviridae	Lytic	66.9463	71.2847	59.113	3.57063	0.959738	0.964239	2.05963	0.552134	2.43457	79.5316	23.8925	0	32.6923	4.15218	6.6806	0.973442	0	0	71.9138	77.7323
k141_573314_flag=1_multi=10.0000_len=15519	Demerecviridae	Lytic	68.9268	53.6154	23.7663	36.0942	7.27624	3.65518	3.47001	0	12.8178	134.575	63.2554	11.592	49.5713	1.74887	10.1298	6.15011	3.54679	0	43.3254	41.6044
k141_303256_flag=0_multi=12.0000_len=14543	unknown	Lytic	26.7464	25.174	14.4921	9.62913	6.47046	2.60032	7.40576	0.744487	0	18.6502	21.4775	12.37	29.3878	18.6624	0	6.56285	1.89241	3.42916	102.246	41.2653
k141_153142_flag=0_multi=17.9168_len=35477	unknown	Lytic	10.9641	5.62882	0	0	2.12194	2.13189	4.17426	11.9023	6.05556	7.64525	0	0	0	7.65023	31.018	27.441	9.69688	11.9485	121.618	50.6557
k141_333327_flag=0_multi=13.1782_len=12680	Zierdtviridae	Lytic	3.83451	18.3735	4.15535	0	5.9369	0	0	0	0	57.7541	0	0	6.74112	0	0	0	0	3.93299	112.935	164.558
k141_423518_flag=0_multi=22.4343_len=13040	unknown	Lytic	63.387	22.9709	8.08126	12.8868	0	0	6.19452	17.4362	10.9833	49.9197	13.6874	0	45.8851	4.16269	22.1018	0	5.27632	5.73662	185.177	108.693
k141_273600_flag=0_multi=11.7747_len=15806	Casjensviridae	Lytic	126.122	117.918	26.6683	10.6316	14.2882	2.39254	1.7035	4.10999	1.51021	46.3319	0	0	16.2237	3.43423	0	7.24612	0	0	119.538	70.6369
k141_663991_flag=0_multi=22.7460_len=19301	unknown	Lytic	49.1229	25.8657	35.4887	15.9619	9.75078	3.9186	6.97516	1.12192	0	25.2948	16.1829	23.3015	0	2.81236	4.07243	0.989001	2.8518	3.87573	207.215	91.7616
k141_543640_flag=1_multi=13.0000_len=42242	Kyanoviridae	Lytic	14.9633	5.51527	27.4413	23.2057	9.35608	9.84758	4.46188	3.84466	10.3599	30.1781	27.4642	31.9403	18.2116	5.14004	6.20251	7.68212	6.18939	6.19808	51.1564	43.9485
k141_543700_flag=0_multi=52.8777_len=16692	Kyanoviridae	Lytic	454.407	255.22	113.637	5.03366	6.76491	7.92941	22.5831	24.6483	35.7512	185.24	53.4639	32.3322	30.7252	48.7792	117.724	51.4613	36.273	32.8645	350.763	291.177
k141_484111_flag=1_multi=9.0000_len=13616	unknown	Lytic	21.4255	0	7.7394	0	0	0	0	0	0	19.92	6.55419	0	0	0	0	0	0	0	57.5712	21.9776
k141_574294_flag=0_multi=16.2749_len=15793	unknown	Lytic	217.047	301.359	183.495	51.4286	4.76667	14.3671	0	2.74225	7.55725	182.045	115.84	5.69545	27.0618	18.9038	14.931	4.83473	1.74263	1.57887	93.3348	34.9098
k141_664787_flag=1_multi=8.0000_len=17221	unknown	Lytic	0	19.3266	15.2981	13.0108	7.64996	7.68583	6.25411	7.54457	6.00651	6.3	33.684	28.7275	12.4089	18.9123	4.56431	2.21691	1.59812	4.34385	54.9049	41.3174
k141_604700_flag=3_multi=38.8848_len=55967	Casjensviridae	Lytic	56.0347	27.3552	9.41444	13.011	8.07046	18.9194	5.77315	1.54764	6.11327	84.3249	17.54	16.0717	13.7455	9.69883	4.68145	0.682141	0.737612	0.222767	130.374	55.3429
k141_664809_flag=1_multi=9.9244_len=30618	Straboviridae	Lytic	112.748	107.615	72.2768	41.163	7.37605	1.23511	0.879401	0.707236	6.23694	256.897	104.929	70.5062	75.3769	35.4572	13.6916	5.61102	1.79772	1.62879	35.7904	77.7106
k141_634886_flag=0_multi=12.0000_len=11537	unknown	Lytic	16.8576	20.1938	45.6703	29.1313	0	21.306	15.17	2.8154	2.7587	28.2116	34.8087	15.593	7.40898	0	0	9.92738	1.19274	0	137.502	95.0828
k141_274558_flag=0_multi=26.8130_len=52402	Mesyanzhinovviridae	Lytic	15.3096	5.71621	0	0	0	0	0	0.826463	0.607364	11.3871	3.40605	0	1.63119	0	0	0.364274	1.57559	0.951688	94.289	46.5694
k141_394983_flag=0_multi=13.2434_len=10940	unknown	Lytic	248.886	377.24	500.89	192.006	87.7349	24.197	23.3814	18.8039	8.00042	267.76	758.638	612.536	402.384	188.546	52.6887	20.9383	22.6409	3.4189	145.671	66.8972
k141_215032_flag=0_multi=20.0000_len=10374	Kyanoviridae	Lytic	9.37374	19.2494	66.0273	16.1985	9.07075	40.0984	3.89322	0	0	5.22905	4.30123	108.382	4.11979	0	10.1024	3.68011	2.65291	7.21086	190.309	152.774
k141_515161_flag=1_multi=10.0000_len=27511	Autographiviridae	Lytic	37.998	18.1467	3.83045	16.2886	2.73636	0.687297	4.89359	2.36133	4.62755	135.068	40.5483	9.80862	15.5351	18.7443	18.095	11.7956	18.0067	4.07867	36.3368	132.213
k141_515185_flag=0_multi=13.8914_len=42490	unknown	Lytic	58.9318	28.982	21.0809	6.5915	1.32878	6.23006	12.357	7.89926	12.5466	62.5573	29.4042	14.8185	8.04682	12.7751	9.86609	24.2596	30.1186	16.7252	93.4993	59.9019
k141_455385_flag=0_multi=12.5922_len=21651	unknown	Lytic	11.2285	32.2816	7.30079	28.4587	21.7311	8.73319	9.32711	7.5011	4.04252	5.01096	37.0965	10.3862	7.89593	2.50711	19.3622	7.93489	0.635566	3.45506	92.9031	63.1353
k141_215461_flag=1_multi=10.0000_len=12384	unknown	Lytic	1.96308	5.37505	0	0	0	6.10731	0	0	0	10.9508	0	0	0	0	0	0	0	0	69.6284	50.889
k141_155220_flag=1_multi=9.7899_len=14904	Kyanoviridae	Lytic	9.78695	13.3987	14.1411	7.51671	0	0	0	0	0	20.0184	17.9633	21.1231	5.7352	0	3.51592	0	0	0	60.5124	68.8556
k141_605747_flag=1_multi=10.0480_len=17147	Mesyanzhinovviridae	Lytic	0	0	0	0	0	0	0	0	0	0	0	0	4.98498	0	0	0	0	0	64.3792	25.9881
k141_425713_flag=0_multi=16.0000_len=14317	Herelleviridae	Lytic	110.372	86.0128	62.5639	58.6868	2.62904	2.64137	1.88067	4.53744	4.44606	107.985	31.1664	6.28262	29.8517	9.4785	5.49011	5.33316	0	0	105.441	100.816
k141_695702_flag=1_multi=7.0000_len=11560	Demerecviridae	Lytic	0	0	22.7897	50.8783	29.3045	55.6125	4.65839	1.8732	8.94793	9.38514	0	7.78099	22.1827	0	0	0	3.5711	3.23553	53.6193	62.7465
k141_575800_flag=0_multi=15.5967_len=18504	unknown	Lytic	39.4144	8.99327	5.69496	12.1086	2.03415	2.04369	0	1.17024	0.430003	4.39738	0	0	0	0	2.83189	2.0632	2.97463	0	108.048	51.856
k141_515805_flag=0_multi=10.9907_len=23775	Drexlerviridae	Lytic	10.2254	11.1991	39.8913	31.8064	1.58317	4.7718	0	0.910795	0	4.56329	0	1.89166	3.59526	0	0	11.2405	4.63029	0	69.4774	50.8596
k141_456200_flag=0_multi=11.7939_len=18415	unknown	Lytic	35.6444	43.3763	40.0574	85.1701	28.6158	68.7946	30.7052	20.5782	6.48122	36.822	145.385	212.476	176.386	100.221	41.2609	29.0244	41.8461	16.9259	84.6971	71.3596
k141_6026_flag=0_multi=11.9726_len=17819	Kyanoviridae	Lytic	35.4723	33.6204	5.91389	12.5741	8.4494	15.9169	5.2887	7.29137	10.2703	30.4429	35.0577	17.6676	40.7743	31.9858	27.9372	16.0688	12.3559	9.09583	58.2778	33.6787
k141_6085_flag=0_multi=19.8027_len=10892	Casjensviridae	Lytic	51.3357	30.5566	14.5124	15.4282	13.823	24.3036	0	2.98212	3.65258	29.8822	0	37.1619	23.5432	4.98361	2.40549	1.75254	0	0	149.355	81.2277
k141_666716_flag=0_multi=10.6628_len=20384	Kyanoviridae	Lytic	91.8333	124.09	95.6399	162.13	156.956	224.48	67.3666	48.3352	55.4289	139.714	238.603	260.349	364.822	147.793	39.846	63.679	105.311	78.2894	95.9025	51.9802
k141_6178_flag=1_multi=16.6497_len=17725	unknown	Lytic	64.463	28.1656	0	6.3204	0	0	1.51907	0	0.448901	41.3158	5.0348	10.1493	14.4673	3.06242	0	2.15387	0	0	107.326	36.8852
k141_667147_flag=1_multi=9.1765_len=10874	Ackermannviridae	Lytic	76.0131	64.2752	77.5278	66.9661	27.6917	34.777	0	0	0	59.8633	238	107.534	192.587	77.3738	7.22843	21.0653	0	0	75.4328	48.907
k141_306737_flag=1_multi=9.0000_len=14291	Mesyanzhinovviridae	Lytic	13.609	34.9335	66.3646	80.3512	96.1346	116.432	56.5227	5.30331	2.22707	0	56.2016	81.8227	71.7745	79.7642	7.33347	4.00715	1.92578	0	60.6765	37.7254
k141_246248_flag=0_multi=6.6298_len=11423	unknown	Lytic	51.0776	29.1362	106.09	26.9702	24.7133	26.4844	2.35713	2.84349	1.39312	144.84	105.468	78.7431	71.0877	16.6318	9.1747	6.68431	2.40929	2.18289	74.425	48.3362
k141_96836_flag=1_multi=8.0000_len=14343	unknown	Lytic	13.5597	23.2046	36.7356	11.7161	5.24855	0	0	0	0.55475	20.8013	0	0	5.95952	0	0	7.98524	0	0	61.0763	24.6055
k141_156786_flag=0_multi=8.9976_len=17081	unknown	Lytic	9.96285	5.84549	12.3388	6.5587	13.2217	30.9953	9.45806	8.24027	2.32913	26.9944	20.8985	2.63299	2.50212	11.1226	18.4069	12.2929	13.6954	3.64955	71.8667	48.8922
k141_576967_flag=0_multi=15.9830_len=19537	unknown	Temperate	265.046	158.43	70.12	0	0	0	0	0	3.25814	72.1912	13.7035	4.604	17.5006	2.77839	0	7.81643	0	0	98.2401	30.2593
k141_186844_flag=0_multi=12.8732_len=14105	unknown	Lytic	25.8534	18.8769	22.4133	0	0	0	1.90893	2.30282	0.56411	0	0	6.37705	18.1802	42.3322	5.57263	5.41332	0	0.883912	89.4361	22.3111
k141_637471_flag=0_multi=16.9684_len=11293	Peduoviridae	Lytic	21.5273	0	13.9971	9.92023	19.9982	13.3947	0	3.83497	1.40915	24.0176	0	7.96496	0	0	0	6.76125	9.74809	0	75.6395	41.7639
k141_66508_flag=1_multi=14.0000_len=22317	unknown	Lytic	10.8934	8.94806	66.1072	7.52985	10.9629	21.1814	0	0.485149	1.0696	14.5842	29.9912	36.2743	0	4.86458	4.69609	0	3.6996	0	92.1222	73.7128
k141_637558_flag=1_multi=12.2394_len=10694	unknown	Lytic	27.2797	12.449	19.7082	57.6174	10.5592	37.1304	37.7672	33.4107	29.0176	25.3629	54.2428	8.4111	27.9756	15.2276	66.1509	17.8499	29.5956	10.4926	106.25	60.3758
k141_307036_flag=0_multi=17.5510_len=12272	unknown	Lytic	49.5249	100.346	120.218	52.4908	41.4064	107.853	64.7248	10.5871	22.6929	70.725	130.896	124.602	59.2045	44.232	17.08	31.1094	6.72783	3.04781	181.093	99.5262
k141_697210_flag=0_multi=21.1836_len=11643	unknown	Lytic	8.35207	14.2928	40.7291	0	24.2463	8.12	11.563	26.9677	15.0347	16.3069	7.66485	15.451	22.0246	20.9797	18.0027	24.5925	34.2746	9.6374	176.022	78.8518
k141_397563_flag=1_multi=9.0000_len=13930	unknown	Lytic	0	4.77851	0	2.01057	8.10624	0	7.73166	6.99524	9.13916	15.5768	0	0	0	15.5869	5.64264	17.8143	15.8055	17.9003	54.6491	24.1675
k141_277201_flag=0_multi=8.9845_len=11467	Kyanoviridae	Lytic	175.965	296.049	326.238	461.618	262.597	427.072	393.305	214.332	168.614	52.0369	202.345	109.817	108.086	227.218	363.295	292.981	278.405	182.659	94.9999	51.5546
k141_577531_flag=1_multi=9.8770_len=14406	unknown	Lytic	16.8755	27.7237	91.4373	73.8773	14.3704	21.0004	12.1488	10.5219	14.3604	20.7104	105.311	137.364	109.769	82.8955	41.8308	33.1263	41.0737	12.9817	71.2993	65.0832
k141_7446_flag=0_multi=12.9732_len=14823	Kyanoviridae	Lytic	82.0036	127.983	120.856	98.2513	133.313	227.057	128.061	68.6599	55.8257	71.362	90.3075	66.7497	112.447	51.2676	148.476	127.49	106.758	69.8111	99.606	56.9435
k141_398040_flag=0_multi=12.0000_len=17483	Rountreeviridae	Lytic	12.5148	26.6517	51.2342	62.4769	41.9825	34.6087	24.6415	13.6244	7.28184	12.4112	30.627	15.4347	48.8917	45.0198	28.4741	12.0103	8.65796	4.27876	61.3392	53.7216
k141_247140_flag=0_multi=32.6491_len=39962	Kyanoviridae	Temperate	227.522	215.708	88.3394	30.1365	19.3088	14.6678	20.2133	33.8668	46.3923	211.761	49.1297	6.75254	23.5286	42.1081	108.836	73.0837	92.6283	46.7979	224.551	204.117
k141_67373_flag=0_multi=50.9081_len=12114	unknown	Lytic	0	0	0	0	0	0	0	0	0	4.47797	0	0	21.1683	4.48089	0	0	0	0	326.883	21.4805
k141_337616_flag=0_multi=11.5337_len=12948	unknown	Lytic	26.286	28.2751	105.803	21.6306	46.5122	43.8096	18.7156	17.5601	0	33.5163	82.708	86.8361	204.649	73.3646	32.3765	2.94852	21.2552	1.92579	96.4917	114.427
k141_398112_flag=1_multi=11.8598_len=15729	Guelinviridae	Lytic	103.555	103.683	123.945	33.8317	4.78606	0	2.56776	2.75341	4.5528	125.881	82.2689	45.749	144.011	22.4318	3.33151	20.6312	17.4972	4.7559	83.1305	55.5247
k141_67452_flag=1_multi=12.9862_len=19295	unknown	Lytic	75.5972	36.2233	32.769	2.90306	0	3.91982	1.39547	4.48907	6.598	44.9825	0	0	17.7201	2.81324	16.2948	18.7969	19.2556	9.04619	82.6353	53.9025
k141_668498_flag=0_multi=16.9374_len=11387	unknown	Lytic	17.0797	5.84567	9.25438	9.83834	0	0	0	0	1.39752	14.2916	0	0	7.50658	0	2.30093	0	0	2.18979	121.075	51.4169
k141_608307_flag=0_multi=22.9953_len=207466	Kyanoviridae	Lytic	27.8888	18.6091	2.28572	1.48497	3.71926	0.364556	0.45424	0.208749	0.958805	24.0552	7.52766	2.38456	7.00411	1.04656	1.38918	0.368035	0.265309	0	151.167	55.0344
k141_698154_flag=0_multi=19.7817_len=12253	unknown	Lytic	263.881	173.84	150.505	22.8575	3.0719	0	0	5.30176	4.54562	61.9804	54.6245	36.7046	45.3442	13.2902	0	0	2.24609	0	186.518	56.3441
k141_638921_flag=1_multi=9.0000_len=10113	unknown	Lytic	69.7135	26.3283	20.8404	30.4638	29.7755	31.7848	2.66247	0	2.36036	75.096	127.955	124.521	59.1656	29.5212	15.5447	0	5.44276	0	63.5288	28.0626
k141_548557_flag=1_multi=8.0000_len=17034	Zierdtviridae	Lytic	19.9807	19.5387	0	0	2.2097	7.7702	0	0	0	15.9229	0	0	0	6.37331	0	0	0	0	54.796	21.0526
k141_518625_flag=1_multi=10.8417_len=22152	Kyanoviridae	Lytic	175.593	262.929	211.692	313.552	321.143	454.098	495.312	333.336	211.922	82.0353	177.259	209.116	256.602	226.663	609.125	425.687	374.579	267.902	91.0208	49.9239
k141_458512_flag=0_multi=16.4183_len=14467	Autographiviridae	Lytic	23.526	32.2079	7.28414	5.80783	7.80534	11.7629	0.930584	5.98719	3.29997	11.2489	0	6.21748	0	1.87604	0	0	4.75587	1.72359	127.474	57.1644
k141_368470_flag=1_multi=7.0000_len=14542	Kyanoviridae	Lytic	50.1529	0	79.7123	3.85192	2.58836	5.201	0	0	3.28295	7.46061	49.0947	6.18541	11.7559	0	0	2.62532	0	0	58.4622	64.6982
k141_578635_flag=0_multi=36.0000_len=21405	Kyanoviridae	Lytic	135.155	93.2931	54.1544	6.54223	1.75847	1.76671	0	5.0582	4.08898	89.9667	31.2691	25.2133	11.98	12.6796	14.6885	11.5932	2.57148	2.91231	126.175	105.08
k141_8431_flag=1_multi=10.0000_len=10413	unknown	Lytic	14.0079	0	0	0	3.61471	0	0	0	0	15.6284	0	0	0	0	0	0	0	0	56.9644	26.7856
k141_278399_flag=1_multi=14.0000_len=15134	unknown	Lytic	53.0102	59.3777	6.9631	77.726	44.768	43.7286	1.77914	1.43083	4.20604	80.6487	29.4839	59.4346	70.6005	25.1071	3.46249	0	12.7296	3.29525	90.2435	46.5852
k141_399196_flag=0_multi=15.5000_len=12830	unknown	Lytic	37.8968	15.5646	110.883	102.599	51.3406	179.798	27.2823	15.19	1.24034	38.0526	83.4686	31.5485	13.3246	33.8466	4.08428	0	0	0	121.692	62.4932
k141_608974_flag=1_multi=24.0269_len=13893	unknown	Lytic	24.498	57.4948	109.984	26.2071	6.77319	14.9709	4.84516	9.35183	0.572719	35.1411	28.9058	25.8974	39.9916	29.3033	0	0	0	0	216.677	97.9811
k141_578975_flag=1_multi=18.9340_len=18402	Kyanoviridae	Temperate	63.4126	25.3207	22.9061	24.3515	5.11357	5.13755	6.58433	4.70691	1.29716	35.3741	24.2479	9.77592	18.58	2.94976	0	22.821	8.97336	3.38756	130.956	55.546
k141_248372_flag=0_multi=10.8167_len=14455	Straboviridae	Lytic	63.9094	13.8149	65.6117	13.5628	15.6236	5.2323	1.86271	0	3.30271	54.415	27.782	40.4472	41.3934	15.0208	7.25026	7.92336	0	1.72502	57.6959	27.5652
k141_68696_flag=1_multi=10.8524_len=18586	Straboviridae	Temperate	43.1645	68.0473	42.5238	49.7278	37.4658	45.7802	4.3461	11.0683	0	103.612	204.067	244.398	82.7824	62.792	11.2776	11.2975	5.18264	5.36644	78.1784	47.252
k141_248502_flag=0_multi=9.5243_len=10709	unknown	Lytic	4.54025	0	0	0	0	0	0	0	0	0	0	16.7986	0	0	0	7.12997	0	0	64.8982	21.1095
k141_159044_flag=1_multi=32.4408_len=15419	unknown	Temperate	25.2268	0	3.4172	0	0	0	0	0	0	7.03627	2.89389	0	11.0873	5.28064	0	0	0	0	251.471	30.2191
k141_549244_flag=1_multi=9.0000_len=15692	Kyanoviridae	Lytic	12.394	4.24195	26.862	3.56963	9.59469	7.22976	0	0	0	5.18539	0	0	0	0	0	1.21646	0	0	50.5212	57.0029
k141_519592_flag=1_multi=10.9403_len=18219	unknown	Lytic	21.3498	12.7875	86.7608	52.2667	22.7257	59.1564	34.7302	10.1027	7.42441	32.7519	161.643	204.888	159.517	56.6084	38.8286	15.716	33.9881	12.3177	69.5069	65.6108
k141_609497_flag=1_multi=12.0000_len=27917	unknown	Temperate	3.4833	0	7.5495	0	0	0	0	0	0	18.4597	0	0	9.18552	0	0	0	0	0	80.4747	50.1588
k141_459456_flag=0_multi=10.0000_len=13405	Mesyanzhinovviridae	Lytic	125.136	84.4161	302.657	83.5726	64.5818	90.2743	40.1723	27.4614	33.8334	133.541	166.434	147.621	153.037	44.5428	44.9545	27.056	36.9551	26.972	99.1102	52.4725
k141_339509_flag=1_multi=10.6419_len=16925	unknown	Lytic	22.9821	5.89937	87.1678	34.7505	26.6871	43.5699	8.7498	23.6692	11.2829	36.8585	129.183	170.065	60.6043	52.9184	29.4128	31.5795	30.0824	16.206	71.2877	68.1287
k141_9458_flag=0_multi=13.9190_len=25670	Kyanoviridae	Lytic	84.2875	41.4894	98.524	68.7362	11.7304	10.3122	1.04891	0.843559	6.19928	112	69.5301	126.145	106.555	25.375	6.12403	0	0	0	93.0912	53.3773
k141_640097_flag=0_multi=8.5130_len=18686	Kyanoviridae	Lytic	132.704	89.0568	118.429	17.9861	4.02868	8.09515	5.76378	9.85018	5.96141	59.5122	38.2069	24.0684	27.4464	14.5246	8.41292	18.3879	9.57339	10.0082	84.2905	41.6465
k141_670288_flag=1_multi=12.0000_len=12136	unknown	Lytic	26.0416	16.4547	47.7577	9.23114	0	0	0	0	3.27817	55.8731	29.4139	22.2351	21.1299	13.4183	0	3.1458	6.80322	0	69.8527	9.91674
k141_579822_flag=0_multi=9.4266_len=18366	Kyanoviridae	Lytic	104.571	125.04	54.5087	19.8244	19.4697	7.20667	4.39816	0.589518	3.03264	94.5157	53.4499	0	55.8493	20.6888	8.5595	5.19675	8.99095	0.67884	70.2706	34.0482
k141_99808_flag=0_multi=12.1237_len=12309	unknown	Lytic	25.6755	73.0053	68.4895	106.941	48.9268	79.8788	41.5618	28.1474	44.6029	26.4422	10.8752	18.2688	65.9709	44.099	57.4716	57.3793	57.0146	27.3479	117.061	73.066
k141_520311_flag=1_multi=8.6151_len=12515	unknown	Lytic	62.161	66.4848	151.565	60.4232	46.6176	37.7712	13.9845	28.5492	11.444	99.6932	32.0886	53.9043	116.11	60.7224	33.4966	39.6569	30.7869	16.9356	78.2627	50.4213
k141_249345_flag=0_multi=13.0000_len=17301	unknown	Lytic	12.6465	15.3898	0	0	0	0	0	0	0	18.8126	0	0	0	0	0	2.20666	3.18147	0	85.2929	63.029
k141_280009_flag=0_multi=18.9756_len=32600	Autographiviridae	Lytic	0.74573	0	14.5463	3.43648	11.546	17.9802	0.412968	1.32848	1.22036	26.6239	5.47496	13.7957	35.3971	13.3206	0.803701	2.34217	0.844211	0	74.9879	83.9364
k141_69744_flag=1_multi=8.0000_len=12291	Kyanoviridae	Lytic	3.95587	0	8.57372	13.6721	0	0	3.286	0	0	0	7.26075	58.5458	20.8634	0	0	0	0	0	51.6138	31.8891
k141_310184_flag=0_multi=18.7138_len=17787	Kyanoviridae	Lytic	16.4013	24.3251	41.4717	6.29837	15.8711	4.25215	9.08265	3.04354	0.894674	15.2488	12.5431	15.1709	2.4028	16.7846	4.41907	0	6.18908	2.80375	142.117	116.168
k141_520508_flag=0_multi=13.1235_len=13602	Autographiviridae	Temperate	17.873	14.6812	7.74736	16.4724	0	0	0	3.97996	2.33989	5.98215	32.8047	0	0	0	0	0	0	0	65.2353	65.3432
k141_220517_flag=0_multi=11.5768_len=11198	unknown	Lytic	10.855	5.94433	4.70529	0	0	0	0	0	0	0	15.9389	0	0	0	4.67952	0	0	0	79.8174	27.4495
k141_490618_flag=1_multi=10.0000_len=13646	Straboviridae	Lytic	42.7568	19.5118	46.3343	26.6814	51.0288	22.17	0	0	4.0816	89.4429	173.304	181.268	125.278	59.6674	0	5.5954	6.05041	7.30915	63.6037	49.5198
k141_340374_flag=1_multi=10.0000_len=11926	unknown	Lytic	0	0	0	0	0	0	0	0	0	0	0	0	0	0	0	0	0	0	64.9163	18.6827
k141_160370_flag=1_multi=11.0000_len=11204	Drexlerviridae	Lytic	8.67933	11.8823	0	0	0	0	0	0	0	4.84167	0	0	0	0	0	0	0	0	69.316	52.9825
k141_460626_flag=0_multi=31.9791_len=16718	Drexlerviridae	Lytic	46.5334	23.8897	9.45505	0	0	4.52404	0	0	0	43.8044	18.6833	24.2115	12.7822	21.1048	4.70163	4.56722	0	0	129.791	242.279
k141_249942_flag=0_multi=62.8985_len=26817	Drexlerviridae	Lytic	91.5609	106.734	145.395	100.261	8.42152	4.93559	3.51416	12.9197	2.67036	107.21	29.9503	57.0206	52.5926	45.5432	11.7242	1.42363	0	0	228.635	142.488
k141_490949_flag=1_multi=10.9912_len=11036	Demerecviridae	Lytic	39.6515	24.1263	52.5179	78.6721	35.8119	35.9798	25.6178	12.7539	27.3974	29.4923	24.2593	65.2035	54.2173	54.1044	54.6045	43.2419	39.9004	21.4647	76.3026	80.6099
k141_700940_flag=0_multi=16.0000_len=21005	unknown	Lytic	64.8133	38.0279	10.0338	21.3338	5.37586	7.20142	5.12745	6.70088	4.16685	32.2817	4.2486	17.1289	93.5958	42.6396	7.48412	5.45262	5.89602	5.34198	98.7227	49.8627
k141_70702_flag=0_multi=34.5685_len=28294	Kyanoviridae	Lytic	115.136	97.6331	70.7646	8.9088	9.97737	20.0483	32.3555	48.5983	38.2456	65.1858	20.5016	4.76859	34.742	39.3288	82.4153	87.0306	60.7931	71.3843	129.243	108.12
k141_160911_flag=1_multi=13.4889_len=17388	unknown	Lytic	199.933	233.52	269.691	146.576	76.8472	69.5955	20.1306	11.2082	4.57602	85.793	35.9267	31.0381	46.7009	45.2658	55.7525	17.5649	29.2813	20.0766	104.247	47.6081
k141_250392_flag=1_multi=11.0000_len=18434	unknown	Lytic	6.59401	7.22194	0	15.1933	2.04188	0	0	0	3.45309	5.88544	0	0	0	0	2.84264	0	0	0	76.0173	65.2426
k141_611202_flag=0_multi=10.9823_len=12540	unknown	Lytic	11.632	26.5409	0	0	0	0	0	0	0	0	0	0	0	0	0	0	0	0	74.5623	31.5153
k141_130814_flag=1_multi=12.0000_len=26172	Kyanoviridae	Lytic	0	2.54335	0	4.2805	8.62906	0	0	0	1.21608	0	3.40982	25.7761	9.79796	19.7033	8.00876	0	0	0.952742	82.8451	55.9887
k141_611389_flag=0_multi=37.6546_len=24100	Kyanoviridae	Lytic	322.799	323.156	126.805	27.8911	9.37095	10.1995	7.26207	15.724	25.0919	217.21	70.3567	3.73229	37.2412	24.7758	84.7988	52.2761	49.1044	25.349	282.679	224.382
k141_341374_flag=0_multi=8.8092_len=13690	unknown	Lytic	31.9645	43.7605	11.5463	2.04582	1.37473	0	7.86721	0	2.32484	17.8311	0	3.28518	0	11.8951	11.4831	0	0	0	82.3482	56.1915
k141_461465_flag=0_multi=8.9358_len=12623	unknown	Lytic	59.7033	73.8259	50.0893	184.156	111.82	145.298	69.3242	70.3336	48.5362	45.1227	98.977	142.515	169.289	187.059	107.933	72.5864	74.1285	70.1258	108.899	60.0394
k141_250857_flag=0_multi=14.4068_len=12311	unknown	Lytic	43.4439	37.8484	0	2.27498	10.701	10.7512	2.18711	2.63839	0	19.8284	3.62448	0	13.8863	6.61377	0	0	0	0	144.284	65.5902
k141_642708_flag=1_multi=9.0000_len=10347	unknown	Lytic	0	9.64984	5.09228	46.0156	21.8266	32.8934	18.2158	29.2991	16.1489	10.4854	21.5623	17.3863	24.7832	36.7227	25.322	66.4147	58.5163	12.0495	57.0934	37.8805
k141_582116_flag=1_multi=7.8457_len=15436	Casjensviridae	Lytic	3.14988	10.7807	0	0	0	9.79955	3.48866	7.71559	3.60828	31.6283	17.3442	2.91359	11.0751	7.0331	0	2.47327	9.80611	0	61.0446	52.4169
k141_551906_flag=0_multi=15.9703_len=17366	unknown	Lytic	74.1951	34.4974	0	16.1277	10.8373	15.2433	1.55047	2.49386	0	43.7318	10.2778	10.3591	4.92211	4.6886	9.05239	0	0	0	79.7151	40.6914
k141_42200_flag=0_multi=13.9964_len=79201	Kyanoviridae	Lytic	17.4962	22.272	26.6107	24.4	13.5445	11.6981	6.45932	3.5543	10.7496	27.0542	36.0569	30.6638	8.63397	3.42682	7.60868	7.47149	9.38214	8.97277	48.7221	40.1756
k141_312170_flag=1_multi=10.4180_len=10585	Kyanoviridae	Lytic	13.7803	12.5772	29.8667	0	0	3.57265	0	0	5.26192	20.4992	8.43098	0	0	0	0	0	0	0	68.2543	51.702
k141_673099_flag=1_multi=9.0000_len=11715	unknown	Lytic	0	0	0	0	0	0	0	0	0	0	0	0	0	0	0	0	0	0	40.7688	40.4678
k141_643661_flag=0_multi=11.9890_len=22080	unknown	Lytic	22.0206	21.1029	45.34	0	3.40942	9.41987	2.43891	7.35535	0.360361	36.852	4.04175	12.2212	0	9.8336	8.30636	0	0	0	86.9988	47.5824
k141_433082_flag=0_multi=15.0706_len=16320	Straboviridae	Lytic	16.3859	16.3149	12.9142	6.86453	16.1446	2.31719	2.47477	4.64397	0.975095	13.2956	8.20238	11.0231	20.9503	14.9673	22.476	16.3751	1.68635	4.58367	65.3638	29.8462
k141_102874_flag=0_multi=11.6952_len=16202	unknown	Lytic	6.00192	10.271	9.75617	3.45726	0	5.83516	1.66186	0.668256	2.94659	13.3924	2.75404	0	0	0	0	9.42536	0	0	82.2998	28.8591
k141_282967_flag=0_multi=16.0000_len=46355	Straboviridae	Lytic	60.836	61.7469	23.8698	10.2713	1.21799	9.78962	1.16171	0.934275	2.23143	45.0539	29.8404	10.6723	10.1419	5.85497	1.13043	0.823588	0	0	51.9346	56.609
k141_43217_flag=0_multi=22.0000_len=12649	unknown	Lytic	71.1123	31.5746	70.814	55.3547	31.2451	28.402	25.544	35.9505	25.1618	92.2043	67.0249	60.4443	101.365	49.3507	26.9277	28.6731	31.5486	13.7992	234.856	136.354
k141_463058_flag=0_multi=9.9894_len=18881	unknown	Lytic	51.5032	35.2548	27.9063	0	5.98061	0	0	0	0	17.2383	23.6327	9.52792	0	0	2.77535	0	0	0	66.1282	17.5288
k141_162797_flag=1_multi=13.0000_len=13750	unknown	Lytic	694.847	563.984	364.039	103.882	15.056	27.5029	7.83288	0	11.5735	213.039	45.4322	114.48	90.1398	23.6865	3.811	0	7.00542	16.3212	71.057	16.5
k141_162907_flag=1_multi=9.0000_len=10072	unknown	Lytic	60.3425	59.4799	36.6192	25.0264	0	24.405	12.0299	8.59975	30.0196	88.8662	22.151	0	59.4064	0	2.60133	1.89522	19.1272	0	63.8676	29.2264
k141_523811_flag=1_multi=7.0000_len=10121	unknown	Lytic	264.222	240.056	72.8838	27.6724	0	0	0	8.55811	7.86165	29.4787	17.635	0	8.44555	0	0	0	0	0	44.0757	12.8552
k141_132963_flag=0_multi=13.9597_len=14352	unknown	Lytic	30.4901	37.104	62.4113	7.80582	9.1792	5.26985	1.87608	3.01758	4.43522	20.7883	6.21808	9.40095	23.8231	9.45538	0	9.31027	0	11.2931	52.4228	141.138
k141_103430_flag=0_multi=12.7231_len=10066	unknown	Lytic	48.3028	128.95	31.4066	119.642	56.0898	78.8939	44.1358	16.1341	7.11415	99.6973	186.179	71.4868	16.9834	26.9628	36.4404	5.68906	10.9363	26.0103	64.7888	90.8821
k141_43449_flag=0_multi=39.0000_len=17413	unknown	Lytic	33.5071	22.9362	6.05178	9.65047	12.9696	0	0	3.73069	6.39723	65.4206	23.0626	25.8279	9.81765	3.11729	0	0	0	0	277.391	259.274
k141_493766_flag=0_multi=11.8274_len=14665	unknown	Lytic	59.6787	13.617	3.5929	11.4588	0	2.57869	2.75406	0	4.34055	38.8397	15.2134	6.13353	8.743	3.70143	10.7197	0	1.87667	0	82.8799	42.7519
k141_493881_flag=1_multi=12.0000_len=11548	Mesyanzhinovviridae	Lytic	1968.36	951.088	515.583	162.495	19.5566	47.4834	0	16.8763	15.1584	1141.48	262.749	70.1017	107.328	4.70051	22.6885	6.61195	2.38321	0	71.31	34.1521
k141_73258_flag=0_multi=9.7519_len=10662	unknown	Lytic	150.489	127.985	103.778	94.5659	14.1212	109.952	29.0418	19.2942	8.95529	104.3	71.1458	126.545	12.0255	53.4567	54.0625	17.9035	24.5219	4.67739	92.6981	53.3116
k141_133229_flag=3_multi=27.0967_len=24811	Peduoviridae	Lytic	14.6976	18.7801	8.49459	4.5153	0	0	0	0	0	8.74549	0	0	0	0	0	0	1.10924	0	173.151	13.6343
k141_253406_flag=0_multi=8.9873_len=13957	Demerecviridae	Lytic	114.961	176.463	56.6273	26.0869	0	8.1285	5.78753	6.20596	1.14018	207.936	47.9555	9.66701	113.3	5.83379	7.50896	5.47072	1.97186	0	65.4289	58.4375
k141_253490_flag=1_multi=11.9943_len=12297	unknown	Lytic	179.904	97.4354	119.974	148.042	76.5227	89.1826	12.0428	13.207	0	55.1416	47.1719	29.2586	41.7065	52.9704	6.39196	12.4184	11.1902	14.1942	105.28	40.8669
k141_645282_flag=0_multi=19.9660_len=11456	unknown	Lytic	25.4652	92.9673	266.761	97.7908	29.5705	11.5536	11.7517	17.9569	20.142	99.4386	132.429	204.142	205.188	104.242	52.6026	13.3301	18.0176	11.9713	140.662	185.477
k141_314588_flag=0_multi=11.9833_len=14639	Drexlerviridae	Lytic	36.5351	15.9148	14.3971	7.65279	1.28561	0	0	0	0	0	0	9.21664	2.91951	5.562	0	0	0.939999	0	83.6343	32.9957
k141_554516_flag=0_multi=27.9862_len=43199	Straboviridae	Lytic	15.7574	9.2453	15.8561	10.3733	1.30697	3.50161	0	1.25316	0.736756	16.9523	2.06583	0	2.96803	2.51309	2.42604	2.20939	2.54833	1.73165	105.789	70.5519
k141_434778_flag=1_multi=14.0000_len=10381	unknown	Lytic	119.435	121.831	40.6048	21.5835	0	0	24.6404	45.8907	15.3295	41.8042	0	0	20.5851	83.6628	32.8107	9.19406	3.97668	87.673	82.3625	29.2965
k141_525321_flag=1_multi=12.0000_len=36133	Kyanoviridae	Lytic	30.9494	36.8442	52.4959	57.3586	48.4393	17.792	2.23553	4.19503	3.08291	80.319	150.659	148.117	115.916	99.9008	7.97628	1.58487	0	0.690094	75.1258	44.8749
k141_645616_flag=1_multi=19.9755_len=13309	unknown	Lytic	142.478	87.5258	225.661	178.873	96.1574	190.375	40.4621	28.4731	8.36989	50.9487	110.639	54.0676	48.1689	32.6284	25.5923	5.73708	8.27148	2.81034	111.362	58.7166
k141_375140_flag=0_multi=7.8987_len=14718	unknown	Lytic	4.95532	36.1813	50.1194	5.70878	1.27871	2.5694	0.914714	0	0	29.4856	24.2538	9.16717	17.423	1.84405	7.12071	5.18785	0	0	42.0045	33.7026
k141_435429_flag=0_multi=10.9915_len=25930	unknown	Lytic	72.1917	53.9089	30.48	48.605	21.774	21.8761	4.15357	3.3404	4.29598	63.8067	48.183	60.7055	103.839	27.214	4.04175	0	2.12274	0	80.4705	50.741
k141_74912_flag=0_multi=13.9919_len=35395	Kyanoviridae	Lytic	15.1105	10.3434	2.97725	0	0	0	0	0	0	55.9396	16.3885	17.7889	20.5271	1.53359	0	1.61792	1.16632	0	58.5866	77.1245
k141_225614_flag=1_multi=12.0000_len=30625	unknown	Lytic	39.6911	28.256	17.2048	0	0	1.23482	0	0	0.519626	30.9978	0	0	0	0	0	0	0	2.44263	77.9503	40.3865
k141_585506_flag=0_multi=26.0131_len=12638	Straboviridae	Lytic	30.778	23.7016	4.16916	0	13.4024	2.99228	2.13052	0	0	8.5846	7.06139	14.2346	6.76352	4.2951	0	3.02084	2.17766	1.97303	125.587	63.507
k141_105543_flag=1_multi=11.0000_len=13238	unknown	Lytic	55.0932	70.3962	31.8416	48.6605	29.8549	7.14165	3.05093	0	2.40422	131.128	30.336	98.5232	32.2849	4.10043	3.9584	8.65178	0	0	73.7442	44.289
k141_555624_flag=0_multi=11.0000_len=10801	unknown	Lytic	40.5142	30.8141	39.0259	57.0466	3.48486	3.5012	0	4.00966	0	75.3349	61.9678	54.1305	35.6123	25.128	19.4061	0	0	0	68.8346	51.8726
k141_15698_flag=1_multi=15.9773_len=14710	unknown	Lytic	9.91602	4.52513	0	0	10.2352	17.9956	0	0	1.08182	0	0	3.05739	0	0	0	0	0	0	108.777	57.8232
k141_555837_flag=1_multi=10.0000_len=14412	unknown	Lytic	20.2421	0	14.6239	3.88666	5.22342	2.62396	1.86827	3.00502	0	26.3477	0	12.4824	0	0	0	0	0	0	44.1861	43.446
k141_226245_flag=1_multi=9.7034_len=14162	Kyanoviridae	Lytic	75.5313	63.4531	48.3666	47.4633	46.5118	24.0325	0	3.05807	0	114.912	204.799	98.4464	123.732	57.4934	12.9505	13.4788	0	0	68.305	45.0168
k141_165673_flag=0_multi=9.0979_len=11854	Autographiviridae	Lytic	75.8815	33.6922	93.3428	59.0672	63.5059	73.3743	32.9357	15.5273	36.2465	54.9142	67.7558	136.584	151.428	48.0813	22.1028	16.1032	60.3639	43.1222	106.829	53.1642
k141_226357_flag=1_multi=15.0000_len=13168	unknown	Lytic	31.3854	113.738	36.0122	4.25384	2.85844	8.61554	6.13431	3.28891	2.417	45.315	40.6631	13.6616	12.9826	4.12222	0	0	0	1.89362	114.457	60.5804
k141_466221_flag=0_multi=11.7757_len=20527	unknown	Lytic	74.6129	19.4567	66.7382	9.55088	5.50104	1.84228	0	1.05491	0	137.419	28.259	17.5278	4.16414	5.28879	0	0	0	0	66.8491	67.1471
k141_135855_flag=0_multi=11.9210_len=10944	Kyanoviridae	Lytic	66.6414	51.6995	149.249	30.7097	12.0376	12.0941	3.69045	0	0	57.002	40.7721	98.6275	39.0522	24.7996	9.57626	0	7.54421	0	103.897	90.7983
k141_376494_flag=0_multi=9.9846_len=13032	unknown	Temperate	0	15.3233	0	0	0	0	0	0	2.44223	0	0	0	0	0	0	0	0	0	72.8635	36.5653
k141_527188_flag=0_multi=12.9739_len=10270	unknown	Lytic	61.5463	38.8888	20.5218	8.18129	12.8276	20.2523	2.62176	2.10849	3.09904	89.7939	0	13.1375	12.4845	10.5709	0	1.85869	8.03933	2.42796	124.25	81.3965
k141_136213_flag=0_multi=16.9043_len=46242	unknown	Lytic	5.2573	5.75793	2.27887	0	0	0	0.582274	1.1707	0.344136	3.51928	5.78966	0	0	0	0	0	0	0	104.927	44.3146
k141_407052_flag=1_multi=16.0000_len=11140	unknown	Lytic	102.568	83.6539	89.8659	133.248	86.1597	120.51	53.1743	45.6798	18.5706	92.5203	64.0875	100.929	69.0571	48.7266	72.9102	94.2441	61.7623	16.7876	133.988	74.3097
k141_16637_flag=0_multi=16.9281_len=10383	unknown	Lytic	9.36561	25.6437	0	21.5793	3.62515	7.28431	0	4.17108	1.53266	41.7961	0	25.9891	16.4649	10.4558	10.0937	0	0	0	67.0137	90.6919
k141_616717_flag=1_multi=11.5850_len=10552	unknown	Lytic	55.2937	53.6201	74.9002	82.2807	26.7532	5.37573	3.82755	3.07821	6.78649	35.9859	126.86	46.8836	48.6035	61.7302	14.898	19.8991	13.0408	0	113.117	56.4875
k141_76548_flag=0_multi=21.9826_len=53106	unknown	Lytic	2.74667	1.88014	0	2.10954	0	0.356047	0	0	1.49828	9.19322	0.840224	3.3875	0.804781	1.02213	7.89384	0	0	0	72.9977	37.561
k141_437269_flag=0_multi=9.9859_len=14229	Kyanoviridae	Lytic	165.728	325.128	244.397	344.457	510.543	489.018	505.244	262.516	168.318	66.7164	128.573	123.269	180.218	301.373	574.503	595.642	416.813	198.9	94.9042	54.0629
k141_76899_flag=1_multi=12.7126_len=10704	unknown	Lytic	97.6611	93.28	152.596	0	0	0	7.54639	6.06899	15.6103	65.8819	20.8431	0	23.9567	2.53557	2.44774	46.3664	47.5658	6.98856	86.1436	63.5861
k141_17104_flag=0_multi=8.9957_len=40872	Kyanoviridae	Lytic	104.091	84.6878	81.216	113.065	48.3485	29.6077	19.7633	30.7286	53.5358	39.153	28.3848	11.0037	11.5024	44.4908	50.0012	49.5058	205.373	28.9788	65.3475	39.3336
k141_136767_flag=1_multi=8.0000_len=11258	Kyanoviridae	Lytic	0	5.91265	0	24.8777	0	0	0	0	0	0	7.92698	23.9692	18.9815	19.2864	4.65458	0	0	0	60.4413	37.0543
k141_256463_flag=1_multi=12.0000_len=42683	Autographiviridae	Temperate	91.7001	55.3626	25.9233	70.2101	11.0231	26.1365	16.4015	13.9514	6.52455	69.2644	32.4075	18.9662	22.0287	12.7173	7.97995	9.39163	4.51348	2.33678	70.7541	198.726
k141_47659_flag=1_multi=10.0000_len=11247	Straboviridae	Lytic	34.5846	47.3475	28.1087	47.3138	41.8333	28.5801	0	9.62664	0	69.9359	107.119	151.953	220.4	106.179	0	0	1.22349	2.21705	71.5659	50.6832
k141_528243_flag=1_multi=11.0000_len=10099	unknown	Lytic	33.7015	13.1824	10.4347	0	0	5.61686	5.33231	0	0	59.0858	0	0	0	5.37493	0	0	0	0	76.4202	29.6314
k141_467790_flag=1_multi=9.9872_len=24074	unknown	Lytic	32.3147	53.9175	107.244	32.5747	10.1628	35.344	17.8952	6.29638	4.62719	25.913	42.6303	33.6269	12.4271	11.2739	5.44169	3.17167	12.0036	4.14309	61.0951	49.6875
k141_377707_flag=1_multi=17.8133_len=66382	Kyanoviridae	Lytic	9.15564	0	0	6.32866	0.567021	0.56968	0.811229	0.326205	1.19863	8.5804	4.03311	5.42004	5.15064	5.72399	0	0	0	0	58.6421	70.6084
k141_137395_flag=1_multi=7.0000_len=11954	Kyanoviridae	Lytic	8.13478	33.4104	30.854	14.0575	0	0	0	0	0	36.3032	14.9309	0	3.57526	0	0	0	0	0	47.3225	34.0126
k141_77636_flag=1_multi=10.9782_len=22771	Kyanoviridae	Temperate	2.13524	20.4625	0	2.45991	1.65298	0	7.68591	3.80381	11.8805	3.57337	0	15.8005	0	16.6866	9.20492	6.70632	8.46028	6.57024	63.3135	9.07057
k141_228219_flag=1_multi=8.8714_len=11078	Kyanoviridae	Lytic	158.005	246.358	294.888	42.9792	8.49431	6.82731	0	16.6149	24.4205	95.4865	52.3625	174.57	146.603	56.3492	4.73021	10.3387	0	0	66.8217	46.3181
k141_228817_flag=1_multi=41.9900_len=37839	Drexlerviridae	Lytic	14.1346	9.67534	6.96237	0	0.49737	0	0	0.572271	3.1542	20.0704	5.89616	2.37713	12.4244	0	0	0	0.727326	0	131.432	61.8062
k141_499165_flag=0_multi=12.0000_len=12193	unknown	Lytic	0	5.45925	8.64263	13.782	21.6091	0	0	0	0	22.2448	0	0	0	0	30.0836	0	0	0	82.3842	27.9439
k141_709087_flag=1_multi=8.8333_len=12427	unknown	Lytic	48.9072	96.4161	29.6796	22.5374	3.02889	12.1724	0	0	3.84169	91.6688	46.6784	25.3335	13.7567	0	0	0	2.21464	10.0327	59.828	58.4998
k141_469220_flag=0_multi=10.9848_len=14569	unknown	Lytic	73.4213	43.4047	122.963	24.9911	45.2124	20.7654	3.69627	0	5.46145	48.4041	162.325	253.132	93.8732	98.7342	7.19353	7.86137	0	0	71.0563	52.8012
k141_349152_flag=1_multi=14.9448_len=27540	unknown	Lytic	49.4337	25.3787	11.4793	0	0	0.686574	0	0.78628	2.31134	53.1825	3.24045	9.79829	21.7263	0	5.7082	0	0.49966	0.905416	71.5994	42.4007
k141_109360_flag=0_multi=28.9453_len=22647	unknown	Lytic	70.8488	236.608	104.696	25.9705	12.4652	5.00947	1.18892	0.95616	5.27009	57.4869	76.8409	15.887	5.6615	0	6.94149	0	0	0	184.522	4.16514
k141_709412_flag=0_multi=11.4719_len=13081	unknown	Lytic	117.084	137.393	177.23	181.991	103.588	141.656	15.4378	17.3816	12.7737	99.5266	112.567	65.3244	16.3362	97.5165	44.065	29.1854	28.4028	30.4994	97.6111	36.1797
k141_559314_flag=1_multi=9.8384_len=11207	unknown	Lytic	41.2158	8.90933	28.2091	4.99818	0	0	0	0	0	36.3028	15.9261	0	3.81357	14.5306	14.0273	0	0	0	78.3833	59.281
k141_289736_flag=0_multi=9.9933_len=29488	unknown	Temperate	34.6261	4.51469	3.57364	0	0	0	0	0	0	20.2356	0	1.52517	0	0	0	0	0	0	68.1849	27.0249
k141_619564_flag=0_multi=6.7864_len=10239	Kyanoviridae	Lytic	21.369	9.75163	0	0	0	1.84669	0	2.11487	0	68.8739	21.7897	13.1773	12.5223	0	0	0	10.7516	0	62.1156	91.6497
k141_139222_flag=1_multi=11.8541_len=22610	Kyanoviridae	Lytic	69.8895	70.6568	41.9468	65.6517	96.5554	162.238	82.1698	65.1253	66.5118	28.7905	23.6821	63.652	69.9395	48.0154	152.963	118.196	118.07	94.2927	85.4599	43.6258
k141_410232_flag=1_multi=8.2156_len=13492	Autographiviridae	Lytic	0	0	0	2.07584	6.9745	5.60576	7.98266	16.8521	24.7691	0	0	3.33339	0	8.04646	48.5485	36.7852	22.4381	18.4814	66.2464	26.8807
k141_440449_flag=0_multi=15.0000_len=23679	unknown	Lytic	246.404	424.48	200.265	82.7953	21.4595	11.1793	1.70566	7.3159	4.36835	101.945	82.914	58.8791	74.0017	67.6254	14.3844	6.44916	4.64906	10.004	96.3453	37.604
k141_169983_flag=0_multi=14.9823_len=17530	unknown	Lytic	33.2835	15.1887	12.0228	0	0	0	0	0	0	24.7558	0	0	0	0	0	0	0	0	99.2073	42.1662
k141_259491_flag=0_multi=16.9038_len=14951	unknown	Lytic	3.25206	17.8087	7.04833	0	3.77633	10.1174	27.0138	15.9318	18.0945	7.25652	0	0	8.57575	0	14.0195	30.642	53.3822	13.3423	113.672	42.9131
k141_501063_flag=1_multi=7.0000_len=12933	Kyanoviridae	Temperate	7.51899	23.161	0	0	1.45519	0	5.20481	6.69734	3.69138	4.1944	0	0	0	8.39425	14.1811	16.2357	18.0879	3.85605	48.9267	16.0962
k141_590974_flag=1_multi=11.0000_len=12339	Kyanoviridae	Lytic	21.6726	0	0	0	0	0	0	0	0	35.1705	28.93	36.4488	0	4.39918	0	0	4.46086	6.06253	67.8521	79.0173
k141_651740_flag=1_multi=6.0000_len=11684	Demerecviridae	Lytic	45.7752	8.54561	27.0574	4.79413	9.66449	6.47321	9.21791	0.926659	4.76699	71.9629	22.9139	3.84921	7.31576	2.3229	0	0	3.5332	0	51.6669	132.861
k141_501489_flag=1_multi=8.0000_len=15501	Chaseviridae	Lytic	9.41002	4.29421	13.5965	3.61361	2.42823	0	0	2.79391	0	24.4967	20.1501	23.211	13.7858	1.7509	3.38051	0	0	1.60862	34.3565	46.3216
k141_260401_flag=1_multi=9.0000_len=14924	unknown	Lytic	9.77384	28.9916	7.06108	3.75332	0	0	0	0	0	19.9915	20.9291	0	0	0	0	0	0	0	69.9617	42.0099
k141_291466_flag=0_multi=33.6237_len=12050	Drexlerviridae	Lytic	36.3149	35.9062	0	0	0	3.1383	0	0	0	74.2789	18.5149	11.1969	14.1871	9.00937	0	6.3365	0	1.03465	121.656	245.032
k141_441479_flag=1_multi=13.0000_len=19830	unknown	Lytic	39.2307	58.7433	116.911	25.4226	26.5739	29.559	9.50472	2.18398	6.82124	27.3556	9.0007	27.2158	19.3973	20.53	11.8914	4.81309	2.77572	1.25745	87.2116	63.2331
k141_81271_flag=1_multi=8.9920_len=22030	unknown	Lytic	6.62119	3.02154	0	0	0.854289	0	0	0	0.722358	1.23119	0	0	0	0	1.18932	5.19892	0	0	65.0762	28.7545
k141_202113_flag=0_multi=29.9558_len=14560	unknown	Lytic	78.4758	116.579	151.99	146.192	73.6771	146.747	112.806	100.388	79.2399	44.7083	82.7449	80.311	88.0605	80.1546	187.147	196.656	131.369	73.641	291.838	214.351
k141_652923_flag=0_multi=10.6365_len=19408	Kyanoviridae	Lytic	98.9567	176.632	100.449	171.726	152.243	196.798	185.21	121.615	108.233	55.9008	101.16	62.5671	66.0635	111.874	190.349	151.466	182.218	120.77	79.0312	46.9686
k141_21640_flag=1_multi=7.0000_len=13548	Straboviridae	Lytic	3.58884	27.0228	31.113	2.06726	0	0	0	0	0	24.024	0	0	0	0	0	0	1.0157	0	51.8952	26.6496
k141_352169_flag=0_multi=18.1366_len=25171	unknown	Lytic	17.3849	10.578	23.026	20.0282	19.4398	13.5214	5.34852	0.860282	4.10942	54.9551	24.818	41.0951	15.2814	22.6433	2.08181	0.758361	1.09337	0.990631	135.262	140.983
k141_412681_flag=1_multi=10.7156_len=13288	unknown	Lytic	124.408	205.384	237.913	208.664	126.052	156.525	54.7102	41.5549	50.8975	155.129	157.825	142.152	157.601	69.445	57.1808	58.898	39.3516	12.1974	78.028	35.0653
k141_52248_flag=0_multi=9.9698_len=13270	Kyanoviridae	Lytic	3.66402	5.01617	0	8.44229	0	0	0	0	3.59764	10.2197	3.36254	0	0	0	0	0	0	0	75.6978	44.795
k141_141830_flag=0_multi=14.0000_len=39584	unknown	Lytic	286.197	165.638	117.136	15.5659	1.42633	0	1.36042	1.09409	2.21111	85.6503	2.25449	9.08936	6.47818	5.48519	6.619	0	0	0	86.9912	30.9377
k141_141842_flag=1_multi=8.0000_len=11914	Kyanoviridae	Lytic	95.9046	276.561	88.4503	653.519	86.8809	84.1142	37.2898	63.6139	70.1244	125.211	138.574	135.896	75.3326	59.2294	153.94	49.6684	49.6649	32.4404	61.9293	44.0918
k141_413130_flag=0_multi=9.9892_len=18404	Straboviridae	Lytic	5.28381	0	0	3.04361	2.04521	0	0	0	0	14.7376	0	9.77486	0	0	0	0	0	0	60.3773	40.5614
k141_472992_flag=0_multi=8.9008_len=10825	Kyanoviridae	Lytic	101.061	61.4915	68.1439	38.8092	24.3399	5.24016	7.46204	2.00038	7.35037	105.235	20.6101	62.3198	15.7926	30.0867	4.84077	0	1.27119	0	65.6212	42.593
k141_323172_flag=1_multi=8.5272_len=15384	Kyanoviridae	Lytic	71.1119	8.65375	0	7.28218	4.89339	11.0618	2.62534	0	1.03442	14.1046	0	0	0	3.52844	0	0	0	0	58.2567	20.2976
k141_82799_flag=1_multi=12.0000_len=15383	Kyanoviridae	Lytic	91.6613	112.506	54.8032	120.164	90.5336	108.166	96.2688	67.5681	56.8969	28.2109	84.1193	55.5489	61.1228	63.516	127.742	28.5406	74.2465	70.5116	90.4639	48.4742
k141_142165_flag=1_multi=7.0000_len=11344	unknown	Lytic	30.0027	55.7443	125.408	49.3781	53.0888	33.3361	28.4826	12.4076	2.10423	23.9096	184.872	166.512	82.8853	40.6728	18.4772	0	13.3434	14.2876	51.292	42.2213
k141_352995_flag=0_multi=58.6079_len=10200	unknown	Lytic	133.471	91.3632	108.479	98.8492	7.38039	5.56125	5.27951	14.8607	7.80076	63.819	48.1206	61.7292	87.9914	53.2171	0	0	5.39633	0	392.658	239.408
k141_713131_flag=0_multi=7.0000_len=10200	Kyanoviridae	Lytic	14.3005	13.0519	10.3313	10.9832	3.69019	3.7075	3.95963	0	0	5.31825	26.2476	0	0	5.32171	5.13738	0	8.0945	0	46.2696	27.9827
k141_82948_flag=0_multi=14.9884_len=26621	Straboviridae	Lytic	75.7971	67.5123	108.859	23.1456	4.94872	1.42055	7.08007	5.28726	6.5756	37.6978	23.4662	5.06827	9.6327	5.09762	3.93684	35.1357	11.372	6.08837	94.1674	62.2533
k141_262286_flag=0_multi=14.3692_len=22573	Straboviridae	Lytic	75.389	39.8096	28.0104	4.96297	8.33739	30.1553	20.2779	13.4301	13.7471	58.877	27.6744	0	3.78671	16.8329	52.2318	14.3759	17.6786	0	112.021	62.8621
k141_203622_flag=0_multi=10.9928_len=10810	Kyanoviridae	Lytic	58.4718	55.4192	77.9868	51.8174	36.5606	6.99657	2.4908	0	0	65.2358	53.6607	74.8876	35.5826	40.1713	7.27122	0	1.27296	0	81.0376	44.0813
k141_383255_flag=0_multi=18.9827_len=22971	Autographiviridae	Lytic	6.34995	2.89777	0	0	0	0	1.17215	11.3121	3.81022	4.72301	0	0	0	4.72609	15.9684	15.7888	5.99044	1.62826	125.56	49.7016
k141_593825_flag=1_multi=12.0000_len=13945	unknown	Lytic	33.1233	26.2535	0	0	0	0	0	0.776413	1.14117	31.12	9.59934	0	0	0	0	0	0	0	85.5364	22.2172
k141_684699_flag=0_multi=32.9709_len=24311	unknown	Lytic	27.9998	1.36902	0	2.30408	0	1.55553	0	0	0	7.80969	12.848	1.84995	0	0	0	0	0	0	244.89	28.2308
k141_263452_flag=0_multi=12.1084_len=29785	Kyanoviridae	Lytic	27.7511	46.9316	10.614	5.64189	3.15931	0.634824	0	0.727016	0.534281	31.872	16.4791	15.0996	15.784	10.0234	3.51864	0	4.61999	0.418586	98.7342	50.1254
k141_714377_flag=1_multi=8.0000_len=13819	Kyanoviridae	Lytic	7.03692	4.81689	22.8771	16.2138	0	16.4193	0	1.56698	0	0	0	0	0	0	0	0	0	0	51.6962	53.1955
k141_84428_flag=0_multi=14.6590_len=14686	unknown	Lytic	84.424	72.5203	7.17552	11.4424	0	0	5.50024	7.37238	9.75228	92.3432	21.2683	0	0	0	0	3.89937	2.81097	16.9789	91.6758	65.3373
k141_174018_flag=0_multi=20.9953_len=94061	Drexlerviridae	Lytic	25.0704	13.7997	1.6805	1.48878	0.400166	0.402042	0	0	0.50755	12.111	0	0	0.908744	0	0.557099	0	0	0	133.135	58.6401
k141_234659_flag=0_multi=13.9968_len=90317	Kyanoviridae	Lytic	0	0	0	0	0	0	0	0	0	0	0	0	0	0	0	0	0	0	101.136	56.5152
k141_685653_flag=1_multi=12.8522_len=20608	Kyanoviridae	Lytic	96.7335	142.122	104.827	137.264	175.341	159.648	190.104	126.617	74.9037	36.852	69.2872	54.5591	47.6994	101.409	200.878	164.877	142.895	104.058	85.2917	38.1964
k141_24506_flag=0_multi=12.0000_len=19333	unknown	Lytic	12.5748	3.44306	21.8031	28.9735	5.84079	1.95606	0	5.04028	1.64626	2.80588	11.5401	9.30515	0	4.21156	5.42092	1.97473	0	0	67.4664	45.8469
k141_445038_flag=1_multi=12.0682_len=14789	unknown	Lytic	6.57537	9.00191	14.2511	22.7255	0	5.11414	0	0.732104	0	47.6841	9.05151	0	34.6788	9.17598	0	0	0	0	84.7532	33.2659
k141_415549_flag=1_multi=6.3647_len=11567	unknown	Lytic	0	17.2641	18.2207	4.84262	11.3893	3.26934	17.4584	5.61619	10.3183	23.4487	7.71521	7.77628	7.38976	11.732	2.26512	8.25136	0	4.31143	47.1592	33.1821
k141_205351_flag=0_multi=10.6122_len=16470	unknown	Lytic	26.5692	68.7066	179.152	61.2181	27.4244	35.5893	22.8875	10.5181	9.17904	107.043	62.3122	133.803	173.861	108.761	19.0897	45.2009	35.0909	13.6258	118.153	81.8604
k141_325486_flag=0_multi=13.0000_len=10083	Kyanoviridae	Lytic	53.0435	102.326	141.091	130.551	119.456	127.518	64.0893	25.7711	38.6673	94.1493	181.44	62.4455	339.095	104.978	49.3714	37.8631	46.4011	27.2029	100.265	42.5821
k141_85180_flag=0_multi=21.9781_len=42310	unknown	Temperate	17.8122	18.0925	4.98131	0	0	0	0	0	0	13.4622	0	0	0	0	0	0	0	0	137.446	43.3397
k141_475524_flag=1_multi=16.0000_len=11051	unknown	Lytic	26.3985	15.0585	19.0715	2.53437	0	0	9.74591	11.7569	19.4401	63.8132	8.07546	16.2788	0	14.7357	2.37088	22.4553	29.8847	11.2819	102.817	56.8066
k141_565196_flag=0_multi=10.9791_len=10690	Kyanoviridae	Lytic	6.82249	31.134	59.1467	36.6793	10.5631	31.838	15.1125	8.10259	11.9091	20.2979	41.7408	50.4855	15.992	15.2333	17.1566	19.6423	12.8724	0	52.0109	40.0881
k141_475765_flag=1_multi=11.0000_len=11432	Kyanoviridae	Lytic	53.1639	49.4926	13.8269	100.446	74.0815	150.512	208.442	84.2906	48.0246	35.5883	42.9348	27.5384	48.6007	125.827	128.345	153.618	93.8882	89.4281	86.8786	44.8127
k141_656539_flag=0_multi=8.9519_len=16952	unknown	Lytic	120.464	143.323	133.652	66.0861	6.66116	0	4.76501	11.4964	10.7955	54.3997	42.1151	26.5303	30.2539	32.0207	21.6381	13.5125	15.4231	26.4767	60.1619	27.6782
k141_326202_flag=1_multi=13.0000_len=17092	Peduoviridae	Lytic	0	0	0	0	0	0	0	0	0	0	0	0	0	0	0	0	0	0	60.2838	33.3509
k141_625481_flag=1_multi=16.2231_len=21418	unknown	Lytic	62.4285	9.32364	61.5018	13.0765	10.5444	17.6564	0.628572	5.05513	1.486	43.0565	43.7501	37.7969	27.9364	15.2063	4.8932	0	0	2.91054	125.91	60.4431
k141_596398_flag=1_multi=8.0000_len=11531	Straboviridae	Lytic	0	17.318	31.9858	4.85774	13.057	6.5591	0	1.87791	0	21.1697	89.002	15.6011	18.5321	0	0	1.65542	0	5.40612	57.7489	58.0384
k141_565977_flag=0_multi=17.3599_len=11001	unknown	Lytic	0	12.1016	0	0	0	0	0	0	5.78622	19.7241	24.3365	40.8819	0	0	0	6.94072	2.50171	0	110.557	114.351
k141_687351_flag=0_multi=12.0000_len=18239	Demerecviridae	Lytic	99.9676	58.3932	46.2217	46.0671	7.22298	0	4.42878	1.18725	3.49001	102.609	29.3575	41.919	96.0736	19.3448	2.87304	2.09317	0.754463	0	41.7824	40.7055
k141_26351_flag=1_multi=13.8827_len=26015	Peduoviridae	Lytic	35.5107	5.1174	4.05073	0	0.723428	5.81456	7.7625	16.6474	6.42292	1.04259	0	3.45755	8.21424	4.17309	17.1213	12.4739	15.3396	4.79246	75.2995	42.917
k141_386466_flag=1_multi=10.6484_len=16919	unknown	Lytic	1.43689	0	0	0	0	0	0	0	0	3.20622	0	0	0	0	0	0	0	0	65.5812	24.56
k141_145855_flag=0_multi=14.1012_len=57370	Straboviridae	Temperate	36.0191	24.3656	13.7763	37.1022	11.8096	4.94376	2.11199	6.41661	3.606	19.8565	16.3333	21.1661	52.1476	26.9657	14.6143	20.962	11.2733	1.95587	92.6459	46.463
k141_236511_flag=0_multi=10.9657_len=12963	unknown	Lytic	24.3802	28.2423	8.12926	0	0	2.91726	5.19276	14.1989	13.5038	29.2928	0	0	3.29698	0	0	42.704	22.2922	14.4267	79.4232	53.258
k141_417183_flag=1_multi=10.0000_len=13904	Autographiviridae	Lytic	24.4786	64.6305	166.74	126.903	28.4249	80.2349	33.8893	18.6889	14.3066	3.90148	96.2765	61.4578	24.5907	54.6562	18.844	24.7121	20.7835	7.17352	62.9466	19.417
k141_657861_flag=1_multi=12.0000_len=10008	Autographiviridae	Lytic	140.89	339.208	310.621	352.61	62.0563	345.744	119.723	76.8108	19.081	311.666	356.682	184.247	55.5159	70.5095	99.4829	45.7763	28.8743	29.8983	105.377	237.825
k141_356870_flag=1_multi=9.0000_len=21970	Straboviridae	Lytic	24.344	12.1192	9.59305	2.54959	2.56987	0	3.67667	10.3491	14.4866	6.17275	0	0	15.5626	19.7657	3.57769	8.68853	20.6692	11.3496	55.727	8.99413
k141_626417_flag=1_multi=9.0000_len=13598	Mesyanzhinovviridae	Lytic	109.057	151.75	201.491	127.699	171.619	141.833	76.2342	34.2377	19.3097	105.716	26.2515	95.9148	78.5753	79.8374	46.2432	32.2871	23.2751	22.0049	65.3734	28.226
k141_176271_flag=0_multi=11.7581_len=27500	unknown	Lytic	136.14	142.811	61.3118	40.7379	2.05309	6.87572	13.7075	51.97	12.4415	67.0679	17.8484	31.073	23.312	47.3729	5.7165	18.7416	7.00542	47.1501	75.7001	27.086
k141_597246_flag=1_multi=6.0000_len=10015	Straboviridae	Lytic	0	26.586	15.7833	0	11.2751	1.88799	5.37704	2.16217	0	16.2495	31.1879	0	0	10.84	0	0	0	1.24489	46.156	24.6834
k141_357028_flag=1_multi=10.4186_len=18779	unknown	Lytic	5.17829	3.54463	5.61157	0	2.00437	2.01376	0	0	0.847412	2.88866	0	14.3695	0	0	1.39521	0	0	0	70.3604	42.1764
k141_266154_flag=1_multi=12.1835_len=13395	unknown	Lytic	0	0	0	0	0	31.055	0	1.61659	0	2.02486	0	0	0	12.1571	0	11.4005	0	0	94.4783	73.0307
k141_176435_flag=1_multi=11.9683_len=10535	unknown	Lytic	4.61524	0	10.0028	0	3.57285	16.1532	7.66744	8.2218	4.53163	20.5965	8.47099	21.3451	12.1705	25.7624	0	3.62386	6.53092	0	55.1541	98.8775
k141_327596_flag=0_multi=10.9612_len=17150	unknown	Lytic	153.094	67.9231	178.193	129.013	59.2583	40.7933	58.09	38.5103	36.1883	126.522	221.153	180.946	99.6821	34.8161	45.832	44.5218	49.7469	47.9802	83.5464	63.2046
k141_146655_flag=1_multi=12.0000_len=19308	unknown	Lytic	40.2913	17.2376	35.4758	50.7694	21.4439	27.4203	1.39453	2.24302	0.824195	71.6426	157.149	128.112	208.071	106.831	2.71397	5.93185	4.27615	0	72.2833	42.8739
k141_717373_flag=0_multi=15.9468_len=12558	unknown	Lytic	0	0	0	0	0	0	0	0	0	0	0	0	0	0	0	0	0	0	110.621	169.265
k141_146742_flag=1_multi=12.0000_len=11650	unknown	Lytic	452.828	451.382	479.409	276.467	45.2326	108.743	11.556	19.5166	16.3916	295.676	298.75	320.417	278.81	95.5167	13.4939	3.27703	0	4.28072	65.0669	35.3189
k141_266880_flag=1_multi=7.0000_len=10454	Kyanoviridae	Lytic	23.255	6.36738	0	0	0	0	0	0	3.04449	15.5671	42.6831	0	4.08826	0	0	0	5.26522	0	50.1701	16.5684
k141_117738_flag=0_multi=16.9710_len=12284	unknown	Lytic	65.309	75.8633	34.3144	11.3999	10.7245	12.3141	6.57575	1.76279	0	19.872	50.8542	73.2239	31.3129	22.0944	4.26582	4.66185	0	0	78.7476	56.7976
k141_328114_flag=1_multi=8.0192_len=12654	unknown	Lytic	3.84239	10.5207	12.4917	0	7.43638	0	6.38348	0	0	0	0	0	23.6424	4.28967	0	0	0	0	67.0571	44.2123
k141_717944_flag=0_multi=92.6327_len=16158	unknown	Lytic	3.00913	4.11961	0	0	5.82374	8.19146	0.833194	0	5.90923	67.1446	24.8539	8.35019	5.2901	0	3.24306	1.18138	3.40652	0	699.652	182.232
k141_538928_flag=1_multi=10.0000_len=12175	unknown	Lytic	0	0	0	0	0	0	0	0	0	4.45553	0	0	0	0	0	0	0	0	56.8183	34.1299
k141_238163_flag=0_multi=6.0000_len=10145	unknown	Lytic	76.6826	72.1745	15.581	0	3.7102	0	0	0	3.13722	48.1237	0	26.5988	0	2.67528	2.58262	1.88159	0	0	45.1663	45.7685
k141_238235_flag=1_multi=7.0000_len=13690	Kyanoviridae	Lytic	158.047	158.024	96.2195	642.388	75.6099	71.8209	32.4522	78.2966	79.6259	93.1179	221.638	65.7036	87.413	33.7029	86.1234	79.4782	76.3922	46.4461	56.4336	42.9455
k141_208915_flag=1_multi=15.9942_len=56617	Straboviridae	Lytic	61.8322	45.8523	30.711	7.91488	3.6565	1.0019	1.18893	0.764935	1.82698	45.0318	14.9743	11.9154	6.03899	12.4637	0	0	3.15962	0	52.2417	57.2928
k141_419482_flag=1_multi=12.0000_len=11392	Demerecviridae	Lytic	187.794	143.156	74.0025	14.751	0	0	0	0	4.88917	116.663	23.5012	7.89574	0	0	0	0	0	0	72.7831	27.4103
k141_268337_flag=0_multi=8.9811_len=10278	unknown	Lytic	858.612	459.825	240.944	136.249	38.453	11.0381	2.61972	3.16027	13.1607	226.949	78.1453	100.643	116.432	60.7352	43.3363	26.0013	8.03307	7.27822	65.9685	17.0894
k141_359779_flag=1_multi=11.0000_len=14147	Kyanoviridae	Lytic	17.1844	14.1156	37.2445	0	2.66063	2.67311	0	0	0	7.66892	0	0	12.0842	3.83696	7.40811	0	0	0	64.2645	46.3291
k141_180042_flag=0_multi=13.0864_len=20539	Peduoviridae	Lytic	2205.12	1758.18	1149.28	256.36	112.706	119.678	27.5299	25.3031	73.2183	1477.71	1110.15	674.426	605.529	298.642	174.765	90.1507	146.725	123.225	66.5346	26.5264
k141_221075_flag=1_multi=10.7303_len=11044	Demerecviridae	Lytic	0	0	4.7709	45.6475	23.8573	18.8329	1.21901	0.980359	13.6888	19.6473	4.04029	0	0	2.45751	11.8619	0	0	3.3867	54.8805	79.7416
k141_607973_flag=0_multi=11.9771_len=10710	unknown	Lytic	22.6991	52.829	19.6787	86.2969	33.3875	21.1857	33.9397	48.5247	14.8586	7.59749	29.164	4.19927	31.9243	32.9439	34.2492	19.6056	23.1271	22.118	192.036	111.46
k141_276493_flag=1_multi=10.6213_len=11220	unknown	Lytic	54.1684	68.2257	159.666	39.9391	20.1283	55.6125	10.799	0	1.41832	74.9389	99.4228	104.218	64.7556	116.11	4.67035	10.2079	0	3.33358	91.5453	86.8979
k141_304155_flag=0_multi=15.8565_len=11164	unknown	Lytic	69.6834	95.3989	56.6354	122.927	45.5159	57.5851	27.7359	13.5775	9.26533	99.6099	147.884	44.3135	0	38.8975	18.7751	0	11.0933	4.46707	61.3122	111.225
k141_469946_flag=1_multi=11.0000_len=15302	Ackermannviridae	Lytic	9.5324	17.4002	20.66	25.6242	0	4.94268	0	4.95292	4.15986	7.09007	5.83204	29.391	11.1721	3.54734	0	14.9696	3.59708	8.14768	62.4241	57.5524
k141_249092_flag=1_multi=11.0000_len=15818	unknown	Lytic	4.61072	0	6.66201	14.1648	0	7.17217	0	0	0	125.173	70.5224	11.3729	21.6152	13.7265	13.2511	0	5.21962	3.15276	0.664164	71.9199
k141_193835_flag=1_multi=11.0000_len=28065	Kyanoviridae	Lytic	97.8842	77.0835	142.684	28.9404	35.541	45.8137	8.63458	11.1878	9.92294	122.738	73.1361	92.945	21.3199	1.93413	11.2028	12.923	5.88376	3.99816	117.455	67.9745
k141_553180_flag=0_multi=13.0000_len=12270	Zobellviridae	Lytic	0	27.1249	51.5304	9.13033	3.06764	6.16406	6.58325	5.29442	0	8.84207	21.8195	0	0	0	4.27068	7.77861	5.60744	0	9.41835	84.4321
k141_580812_flag=0_multi=30.3632_len=26795	Kyanoviridae	Lytic	140.63	91.916	86.5218	14.6334	5.61895	7.05663	27.6339	37.5786	23.1621	36.4408	29.9749	5.03536	11.1652	38.4903	63.5582	70.5274	48.7875	50.7172	126.129	108.706
k141_387466_flag=1_multi=10.0000_len=17024	unknown	Lytic	17.1364	11.7301	30.9503	0	6.63298	13.3282	0	0.635989	0	22.3051	68.1476	18.4927	10.042	3.18852	0	0	0	0	3.18051	66.5862
k141_608472_flag=1_multi=10.0000_len=24245	unknown	Lytic	0	0	0	0	0	0	0	0	0	15.6619	7.36167	0	0	0	0	0	0	0	0	66.3753
k141_83693_flag=0_multi=12.5941_len=33343	Kyanoviridae	Lytic	69.9948	80.8525	71.1106	10.9197	2.25774	2.26833	0.807531	7.46852	2.14771	134.22	74.9415	20.2325	110.234	26.8615	3.14317	7.44244	14.0318	3.36527	20.4075	86.1632
k141_470343_flag=1_multi=11.0000_len=17762	unknown	Lytic	2.73739	0	11.8657	12.6145	14.8339	4.25813	1.51591	3.65739	0.895933	209.203	25.1216	30.3845	36.0928	30.5604	0	0	0	1.40385	0.955456	74.2578
k141_277085_flag=0_multi=13.0000_len=19485	Zobellviridae	Temperate	0	0	0	0	0	0	0	0	0	0	0	0	0	0	0	0	0	0	32.0599	92.314
k141_139015_flag=0_multi=11.0000_len=11379	unknown	Lytic	59.8209	87.7466	41.674	63.9941	26.4628	91.3923	86.368	63.7503	60.1356	42.9049	86.2695	83	18.7796	57.2438	158.876	82.1994	110.046	35.0613	106.032	81.8247
k141_332511_flag=0_multi=7.8753_len=12188	Kyanoviridae	Lytic	125.663	122.883	73.4925	59.7464	115.811	189.269	35.3469	18.6551	15.6681	267.047	54.9158	62.7306	38.5728	75.7126	34.3953	14.0957	51.9355	16.367	87.2583	56.3777
k141_56440_flag=0_multi=10.5430_len=10417	unknown	Lytic	42.0077	19.17	40.4645	8.06584	0	3.63027	0	4.15747	5.34678	15.6224	8.56695	25.9043	0	10.4217	10.0607	3.66491	6.6049	9.5748	102.869	90.1617
k141_360406_flag=0_multi=29.2646_len=14606	unknown	Lytic	31.6243	4.55735	43.2889	115.051	76.0221	179.943	42.3995	64.491	32.6857	14.8558	12.2199	30.7916	23.4088	27.8729	75.3407	84.949	64.0644	26.4614	226.959	210.948
k141_84213_flag=0_multi=21.0245_len=18289	Kyanoviridae	Lytic	5.31703	14.5584	11.5238	6.12549	3.0871	7.23701	2.94445	5.92	2.61035	17.7963	31.717	0	37.3896	5.93597	0	2.08745	1.5048	0	201.89	159.664
k141_1307_flag=0_multi=18.2305_len=13840	Kyanoviridae	Temperate	24.5918	19.2383	3.80707	8.09459	1.35983	12.2958	0	3.12921	1.14982	15.6781	64.4811	107.236	49.4089	15.6883	0	0	0	4.50418	20.2617	147.946
k141_332921_flag=0_multi=19.7633_len=70940	Straboviridae	Lytic	8.22468	8.4449	4.45643	2.36881	0	2.66538	1.32844	1.22098	3.36486	16.8229	11.9509	0	1.20493	1.91294	0.738671	3.76715	2.13373	1.05449	153.652	120.234
k141_29116_flag=0_multi=6.9309_len=12347	unknown	Temperate	39.3793	16.1735	17.0697	4.53669	3.04851	9.18842	0	1.7538	0	37.3445	7.22782	14.5701	6.92293	17.5853	0	0	0	0	36.064	57.6933
k141_305412_flag=1_multi=10.0000_len=13677	unknown	Lytic	79.9872	73.0035	7.70488	24.5732	19.2644	27.6497	9.84335	11.0828	4.65411	61.4766	6.52496	26.3064	43.748	3.96881	3.83134	18.1438	14.0856	0.911573	131.823	58.3853
k141_167337_flag=0_multi=16.5200_len=28478	Kyanoviridae	Lytic	10.244	7.01221	48.105	11.8017	5.94774	17.2629	3.3092	0.380191	2.23521	16.1912	12.5349	44.2193	46.5236	18.1078	9.20031	4.69208	1.93281	1.75119	36.3232	135.548
k141_609246_flag=1_multi=10.0000_len=21130	unknown	Lytic	9.20427	6.30048	2.4936	2.65095	0	0	0	0	0	133.497	103.475	72.3673	28.3172	0	2.47995	0	0	0	8.79653	62.306
k141_636920_flag=1_multi=11.0000_len=21070	unknown	Lytic	0	0	0	0	0	0	0	0	0	0	0	0	0	0	0	0	0	0	47.2146	72.5565
k141_581839_flag=1_multi=11.4328_len=11971	unknown	Lytic	0	5.56049	0	9.35838	6.28853	7.89752	0	0.904443	0	0	0	33.8123	7.14037	24.9393	0	3.18916	3.4485	6.24889	25.1803	76.5555
k141_416175_flag=1_multi=6.8131_len=10775	Straboviridae	Lytic	72.1991	117.376	264.06	213.141	80.3452	170.218	73.7172	14.0677	16.2459	216.481	86.9643	41.7393	75.3629	75.5658	26.7478	31.8883	29.3731	24.2988	39.3004	64.4501
k141_471357_flag=0_multi=46.0000_len=36911	unknown	Lytic	264.112	303.87	224.115	230.669	35.6912	8.70852	8.38892	29.9196	12.5029	212.364	101.546	249.782	333.471	109.56	29.1032	9.30879	1.49122	5.40439	447.713	300.035
k141_1751_flag=3_multi=27.0000_len=11291	unknown	Temperate	10.7656	17.6861	74.6645	39.6879	25.0022	8.37315	0	0	0	9.60873	3.9519	11.9496	0	0	0	0	0	2.20841	237.695	178.392
k141_388886_flag=1_multi=12.5103_len=15504	Demerecviridae	Lytic	3.13607	10.7335	16.9923	9.03228	1.21388	10.9761	10.4201	1.39668	1.53962	17.4942	17.2682	2.90081	2.75662	0	0	0	0	0	23.925	98.8143
k141_333651_flag=0_multi=17.8009_len=12268	Demerecviridae	Lytic	15.8531	65.1105	30.0643	13.6977	6.13629	0	0	0	0	30.9523	7.27436	40.3257	17.4188	8.84928	2.13569	0	0	0	22.7263	168.56
k141_195461_flag=0_multi=9.8244_len=10967	Casjensviridae	Lytic	8.86689	18.2086	28.8264	10.2151	24.0248	6.89641	7.36542	9.87242	5.80416	14.8389	0	0	0	19.7981	0	0	6.27366	0	56.0764	72.1453
k141_168002_flag=0_multi=52.9983_len=63150	unknown	Lytic	35.4171	12.6489	21.6934	3.54803	8.04655	4.19185	0	0.3429	0.755988	19.3276	7.06587	9.97051	15.566	9.4552	2.07448	2.72048	3.26856	0.394856	137.056	355.015
k141_471944_flag=1_multi=9.0000_len=14160	unknown	Lytic	36.0541	14.1027	22.3262	1.97792	14.62	13.3533	1.90152	13.7632	5.05727	22.9856	22.0584	0	15.0913	17.2505	9.25164	9.43651	6.80258	6.16335	38.6375	31.9297
k141_389258_flag=0_multi=15.9027_len=10225	unknown	Lytic	30.9086	71.6098	211.275	71.2166	101.232	257.041	206.714	311.312	138.514	31.8315	74.1864	101.164	71.057	130.063	94.8092	168.018	278.577	130.468	136.652	189.276
k141_57790_flag=1_multi=10.0000_len=19468	Casjensviridae	Temperate	0	0	0	0	0	0	0	0	0	2.78642	0	0	0	0	0	0.980517	0	0	5.14735	66.0379
k141_638047_flag=0_multi=13.0000_len=10433	Peduoviridae	Lytic	27.9622	35.0911	30.3018	0	0	0	0	0	0	28.5971	17.1076	0	40.9649	15.6086	10.0453	0	2.63791	0	45.0814	96.8044
k141_2781_flag=0_multi=9.3335_len=16232	unknown	Lytic	49.4243	110.722	97.3814	32.7833	11.5944	32.6165	21.5643	7.33723	3.92153	21.7225	71.4727	155.16	118.485	55.1777	30.6686	22.3439	34.7577	8.44895	78.812	96.8373
k141_444917_flag=3_multi=41.0000_len=17222	unknown	Lytic	83.2851	61.8415	149.913	29.2725	25.1341	37.329	7.81718	18.8603	11.5503	44.0974	54.4095	26.1144	32.2612	7.87967	15.2135	22.1678	17.5783	24.6137	75.8769	165.921
k141_85985_flag=0_multi=19.1449_len=13670	Autographiviridae	Lytic	1.7784	0	38.5441	4.09763	0	8.29915	7.87872	0	0	5.95239	6.5283	0	18.7588	31.7668	0	0	2.01326	0	59.5903	80.7224
k141_362002_flag=1_multi=9.1254_len=15156	Kyanoviridae	Lytic	40.1009	17.5679	0	14.7835	0	4.9903	1.77656	0	9.44986	32.2127	5.88822	5.93483	11.2797	7.16303	0	2.51896	17.2507	4.9357	112.987	50.4343
k141_279437_flag=1_multi=10.5806_len=13184	Straboviridae	Lytic	23.9715	20.1956	3.9965	48.8598	2.85497	0	0	3.28492	4.82814	18.5154	23.6913	44.3465	35.6588	10.2931	0	0	2.08748	1.89132	78.337	94.9236
k141_3122_flag=1_multi=8.8479_len=12297	unknown	Temperate	0	0	0	0	15.3045	0	0	3.52186	2.5882	22.0566	0	0	0	0	4.26131	0	0	0	50.0114	63.6149
k141_196430_flag=0_multi=7.3584_len=12634	Kyanoviridae	Lytic	0	2.63434	29.1933	13.3009	4.46889	0	0	3.42792	0.629791	0	14.1273	7.11954	13.5313	0	0	3.0218	4.3567	3.94731	10.1704	70.4784
k141_279485_flag=1_multi=16.0000_len=14835	Demerecviridae	Lytic	127.822	116.662	71.0345	18.8792	12.6862	0	1.815	1.45967	0	191.973	48.1251	84.8855	72.0234	23.7836	24.7259	12.8673	0.92758	0	61.8834	72.1907
k141_86163_flag=1_multi=9.0000_len=11842	unknown	Lytic	28.741	14.0527	26.6964	42.5714	0	0	2.27373	1.82859	1.34382	96.1973	41.4483	37.9785	14.4363	0	0	0	0	0	36.6465	58.7116
k141_307267_flag=0_multi=22.4719_len=16236	unknown	Lytic	10.4814	4.09982	9.73574	3.45002	2.3183	3.49376	8.29192	3.33428	3.43049	36.7521	0	16.6202	2.63234	20.0597	12.9099	5.87851	11.8656	4.60738	161.318	119.001
k141_500599_flag=1_multi=9.9169_len=10857	Zobellviridae	Lytic	4.47836	24.5241	9.70615	0	0	26.1236	1.24001	1.99449	0	4.99642	4.10988	4.14241	0	0	0	28.1311	5.06978	0	6.77353	76.0969
k141_555863_flag=0_multi=54.4818_len=13889	Drexlerviridae	Lytic	42.0087	28.7557	15.1745	0	0	0	0	0	2.29153	37.104	0	6.47622	67.6976	15.6329	5.65929	2.74875	1.98152	0	99.3221	194.789
k141_417692_flag=1_multi=11.0291_len=16540	unknown	Lytic	26.4567	72.4403	92.3824	8.46653	5.68923	19.4341	1.6279	8.5098	6.73488	68.8735	116.004	19.0338	33.5915	18.0501	9.50446	25.3901	14.9753	8.29162	32.638	80.334
k141_611134_flag=0_multi=27.1651_len=10279	unknown	Lytic	0	0	0	0	0	0	3.9292	2.10664	0	58.0511	17.3639	35.0027	37.4208	2.64041	10.1958	0	0	0	0.0786199	208.772
k141_59260_flag=0_multi=27.9753_len=24188	Kyanoviridae	Lytic	219.107	66.0472	60.9937	8.1053	0	3.12688	0	4.0286	7.23702	82.9794	27.6713	7.43743	21.2033	16.8311	11.9153	6.31345	9.67137	6.18534	122.416	117.464
k141_363056_flag=0_multi=12.4936_len=12810	unknown	Lytic	81.6053	96.1315	341.394	179.282	145.447	150.557	55.7007	16.9041	9.31707	107.984	62.6992	105.326	76.7361	14.831	83.8584	5.96056	4.29685	0.97327	93.9353	65.6378
k141_556744_flag=0_multi=17.5651_len=21868	Demerecviridae	Lytic	97.8301	101.972	132.52	12.8074	3.44247	6.05257	0	2.97066	2.91084	306.356	71.4164	28.7927	76.2214	14.8934	22.7644	10.4749	5.03408	0	38.5811	118.696
k141_252948_flag=1_multi=10.0000_len=14131	Phycodnaviridae	Lytic	0	0	0	0	0	0	0	0	0	3.8388	0	0	0	3.8413	0	0	0	0	0	66.7526
k141_335688_flag=0_multi=9.9992_len=14780	unknown	Lytic	0	0	0	0	0	0	0	0	0	3.67024	0	0	0	0	0	0	0	0	0	66.5723
k141_59615_flag=0_multi=29.9831_len=16661	Autographiviridae	Lytic	16.0506	39.9523	85.3865	79.0074	31.6283	61.2835	15.3528	20.1452	6.68597	22.7911	48.207	151.165	112.869	107.514	37.7418	24.0599	14.8666	1.49662	289.135	253.259
k141_225298_flag=0_multi=10.5517_len=13866	Ackermannviridae	Lytic	273.51	259.23	258.395	151.489	31.2173	2.72728	12.6219	25.7676	31.5609	84.1116	48.2702	81.0871	67.8098	31.3177	69.9137	56.4429	73.4377	38.6634	168.667	74.4793
k141_142165_flag=0_multi=13.2951_len=21990	unknown	Lytic	43.116	69.6219	47.9216	16.5573	7.70259	7.73871	2.44889	2.95418	1.44734	71.5388	2.02915	20.4521	11.6613	13.5765	4.76592	0	0	0	42.1156	84.2386
k141_225318_flag=0_multi=10.9339_len=13765	unknown	Lytic	0	0	0	0	0	0	0	0	0	35.4679	19.4497	0	0	0	0	0	0	0	0	70.2406
k141_418974_flag=0_multi=18.2249_len=18926	Kyanoviridae	Lytic	21.8368	31.6539	83.5197	25.1571	6.96079	44.9578	12.8041	0.572074	1.26125	2.86622	89.5908	159.213	99.3608	50.1916	13.8437	8.06878	4.36246	0.658754	33.4338	172.035
k141_391082_flag=0_multi=13.0000_len=26592	unknown	Lytic	53.0244	72.5923	55.4796	24.2241	30.4324	0.71105	3.03763	11.4004	3.29139	83.6376	28.5257	11.8389	14.4648	12.2476	2.95585	0	4.13979	0.468847	47.6821	93.1149
k141_391308_flag=3_multi=35.0000_len=44989	Autographiviridae	Lytic	12.4286	18.4947	33.964	19.2986	17.9879	16.8114	4.18944	2.40661	1.94547	24.1153	16.8609	13.9954	18.0496	10.8589	5.24141	9.33454	5.81147	1.1085	36.4647	232.606
k141_4717_flag=0_multi=18.8049_len=11145	Peduoviridae	Lytic	45.8077	101.534	170.196	35.1819	20.2638	10.1794	0	0.971474	1.42787	141.152	76.0698	12.1061	0	4.87048	14.1053	3.42552	0	0	10.8041	161.248
k141_87798_flag=1_multi=13.0000_len=12871	unknown	Lytic	0	0	0	0	0	0	0	0	0	0	0	0	0	0	0	0	0	0	0	77.5834
k141_281158_flag=0_multi=31.8777_len=11297	unknown	Lytic	66.711	50.084	65.2967	0	3.33186	0	0	3.83361	1.40865	175.266	110.595	51.7539	109.713	0	0	11.828	1.21808	14.347	136.132	272.665
k141_640535_flag=0_multi=42.0000_len=31743	Drexlerviridae	Lytic	145.514	153.08	144.41	91.7606	6.52175	7.148	1.69647	19.783	2.75729	141.84	40.7651	150.183	86.1694	53.8659	14.0318	6.01352	0	2.3566	256.878	167.512
k141_474668_flag=0_multi=11.6256_len=14763	Kyanoviridae	Lytic	19.7609	15.7811	7.13809	7.58851	0	0	1.82385	1.46679	0	53.2797	33.2473	12.1856	28.9499	29.4149	19.5223	5.17204	2.79631	3.37806	14.2325	93.8043
k141_530107_flag=0_multi=10.8951_len=20246	Kyanoviridae	Lytic	21.6139	21.3706	18.2174	11.0668	0	0	1.32992	0	0	93.7772	55.0985	4.44277	2.11097	9.38383	0	4.71419	0	0	86.0982	119.691
k141_309723_flag=0_multi=26.3207_len=20197	unknown	Temperate	0	0	0	1.38671	1.86364	1.87238	0	0	0	98.0335	0	2.22677	0	0	3.89176	0	0.681321	0	1.00031	197.807
k141_254264_flag=0_multi=22.0000_len=20707	Peduoviridae	Lytic	0	0	0	0	0	0	0	0	0	7.8591	0	0	0	0	0	0	0	0	25.0554	136.151
k141_503056_flag=0_multi=12.9934_len=10751	Autographiviridae	Lytic	0	12.383	14.7028	5.21017	0	1.75874	0	0	0	25.2284	12.4512	16.733	7.95065	35.3428	4.87409	0	0	0	0.902019	95.6807
k141_5578_flag=0_multi=41.0293_len=14644	unknown	Lytic	63.0845	102.274	57.5688	17.2129	43.6957	51.6477	3.67734	6.65417	2.17339	94.4603	88.3643	55.281	17.5111	3.70674	3.57835	0	0	0	42.4927	310.854
k141_143431_flag=1_multi=12.8997_len=21487	Zobellviridae	Lytic	0	4.64685	26.9739	1.30345	1.75176	6.15989	0	0	1.48123	13.8853	12.4599	41.8617	19.8905	10.105	0	0.888384	0	0	1.24114	95.1799
k141_171437_flag=0_multi=12.3964_len=35315	unknown	Lytic	57.1371	53.7191	76.0918	18.2406	2.13167	6.425	0.762438	0	4.95679	103.684	35.3784	49.667	41.1473	21.5189	5.19339	10.8105	16.3655	18.005	17.7805	80.684
k141_282096_flag=0_multi=12.4637_len=63978	Kyanoviridae	Lytic	9.87965	22.3692	35.4131	25.8281	15.2965	10.0485	2.73556	2.7077	9.32756	18.6535	26.5028	29.5244	8.68428	2.54532	9.4191	5.37054	10.5391	5.26157	44.5637	40.1388
k141_171475_flag=0_multi=9.4870_len=16196	Orlajensenviridae	Lytic	9.00622	0	13.013	0	0	0	0	1.33701	0	6.69871	0	0	0	0	0	0	0	0	39.5684	37.9072
k141_199111_flag=0_multi=10.9828_len=12942	Peduoviridae	Lytic	18.7844	23.1449	4.07123	12.9844	1.45418	14.61	1.04024	5.01951	1.22961	12.5744	3.44776	0	0	8.38842	2.02447	1.47494	3.18977	0	68.7494	52.3391
k141_116426_flag=0_multi=33.9637_len=20134	Kyanoviridae	Lytic	281.336	198.365	159.634	25.0388	9.34736	3.75648	0	10.2173	7.90382	134.713	26.5944	33.5061	65.8041	9.43603	16.9171	11.377	11.6187	9.28846	306.492	231.302
k141_558578_flag=1_multi=11.0000_len=11243	unknown	Temperate	0	0	0	0	0	0	0	0	0	7.23732	0	0	30.4109	0	0	0	0	0	0	67.4088
k141_475421_flag=1_multi=13.5885_len=13022	Zobellviridae	Lytic	3.7338	10.2234	52.6008	21.5077	1.44525	13.0682	12.4062	4.98867	0	41.6573	0	0	0	0	4.02406	1.46588	14.7941	2.87227	9.18475	85.6136
k141_531151_flag=1_multi=8.9051_len=14230	Kyanoviridae	Lytic	1.70842	9.35553	7.40546	7.87274	0	0	0	0	1.11831	34.3089	12.5428	6.32103	6.00684	0	0	2.68288	3.86807	0	11.8125	56.8592
k141_199323_flag=1_multi=8.8362_len=10167	unknown	Lytic	0	3.27356	10.3649	0	1.85109	14.8781	0	0	7.04347	5.33551	8.7776	0	21.0183	13.3475	5.15406	0	1.35346	0	5.48453	65.185
k141_33933_flag=0_multi=10.4182_len=13856	Straboviridae	Lytic	452.669	293.046	292.806	228.408	24.4486	30.0217	39.8364	28.9118	49.9596	115.492	70.8473	61.6707	40.0984	72.4745	39.7094	44.0848	69.5183	51.2884	182.962	78.0543
k141_613840_flag=0_multi=16.0000_len=56020	unknown	Lytic	22.5662	24.3587	43.2655	25.4975	7.05498	8.10064	0.480641	1.54617	1.98848	170.911	62.1284	40.944	60.2706	34.3983	17.305	3.40748	2.94766	1.55789	9.57874	114.602
k141_310481_flag=0_multi=13.6649_len=25059	unknown	Lytic	44.6265	58.4389	52.5658	8.94123	0.751027	1.5091	7.52139	1.29619	6.03291	123.39	119.303	17.9473	40.9325	42.2398	4.18223	9.14101	5.4913	5.97035	19.2528	86.9344
k141_558967_flag=0_multi=23.3665_len=26174	unknown	Lytic	117.959	373.844	835.42	900.975	804.599	785.255	60.1797	62.876	20.6717	452.845	448.357	353.965	697.235	238.495	49.0499	20.4204	13.6692	0.952669	6.17509	147.759
k141_227187_flag=0_multi=21.7049_len=27624	Straboviridae	Temperate	99.4468	145.785	76.2957	32.444	2.72516	6.84486	0	0.783889	5.18469	286.705	187.374	52.0986	74.2636	22.5976	8.53627	0	0	0.902663	32.7946	80.0986
k141_475919_flag=1_multi=10.0000_len=12681	unknown	Lytic	3.83421	0	0	2.2086	0	1.49107	15.9247	1.70761	14.4315	4.27775	0	0	10.1109	4.28053	0	7.5265	0	1.96634	75.1352	59.4441
k141_504128_flag=0_multi=11.9803_len=12437	unknown	Lytic	0	0	0	0	0	0	0	0	0	17.4467	0	0	20.6185	0	0	0	0	0	33.5937	80.4869
k141_34402_flag=0_multi=13.0000_len=18238	unknown	Lytic	13.3297	10.9493	8.66704	0	0	0	0	0.593655	0	23.7948	70.9512	32.0575	35.1508	0	2.87319	2.09329	0	0	65.6681	89.3518
k141_614189_flag=0_multi=23.0000_len=65622	Kyanoviridae	Lytic	2.96374	4.05746	0	5.54836	0	0	0	0.824958	0.970014	17.3595	1.35994	1.3707	6.51286	4.13592	0	0	0	0	48.3486	72.5662
k141_255454_flag=0_multi=15.1153_len=29906	Kyanoviridae	Lytic	11.3807	10.0161	29.9514	2.80953	0	0	0	0	1.06424	27.2083	56.6975	42.1078	60.0222	51.7295	8.761	1.27658	4.6013	0	14.6462	97.8059
k141_144467_flag=0_multi=9.5382_len=10802	unknown	Lytic	54.014	40.0546	78.0445	116.675	15.6804	47.2618	11.2169	2.00464	3.68301	75.3279	41.308	104.088	87.0442	12.5628	4.85107	0	1.2739	2.30838	26.1099	109.607
k141_199780_flag=0_multi=14.9911_len=34886	unknown	Temperate	0	1.90806	0	0	0	0	0	0	0	7.77477	3.83715	7.73505	0	0	1.50207	0	0.788892	0	47.882	105.825
k141_172476_flag=0_multi=11.9838_len=15071	unknown	Lytic	27.4224	6.6251	20.9766	0	14.9851	22.583	1.78658	1.43681	2.11181	10.7981	0	5.9683	14.1791	0	20.8618	0	3.65222	8.27257	28.9558	83.578
k141_117504_flag=0_multi=37.0000_len=28582	Autographiviridae	Lytic	32.3214	10.48	0	29.3968	9.21838	3.30772	2.82613	3.78808	4.73253	176.506	35.9066	15.7351	22.4295	19.9411	11.0002	12.0214	13.4804	1.74482	34.8338	152.552
k141_34728_flag=1_multi=10.0000_len=11774	unknown	Lytic	0	0	0	0	9.59062	3.21186	0	0	0	13.8218	15.1591	0	0	9.22056	0	0	0	0	21.6893	56.219
k141_62432_flag=1_multi=8.6831_len=16096	unknown	Lytic	21.1451	59.9644	65.4694	19.1402	10.5231	32.8921	3.34562	5.38125	4.44899	134.806	38.8105	27.9412	13.2762	13.4894	19.5333	5.92964	1.70982	3.09831	67.5286	75.2245
k141_255842_flag=1_multi=9.8128_len=10285	Kyanoviridae	Lytic	4.72743	16.18	0	0	0	9.19214	0	3.15812	0	5.27429	0	30.6095	0	2.63887	0	1.85598	0	0	30.0938	67.2834
k141_587672_flag=0_multi=8.9517_len=12722	unknown	Lytic	63.0605	23.5451	0	17.6119	16.2726	4.45879	2.11645	0	3.75261	27.7157	0	0	13.4377	0	0	0	0	0	70.6371	45.8936
k141_117838_flag=1_multi=12.0000_len=15057	unknown	Lytic	0	0	0	0	0	0	0	0	0	3.60272	0	0	0	0	0	0	0	0	6.17224	73.0705
k141_118150_flag=0_multi=24.8902_len=11562	unknown	Lytic	443.658	247.559	150.386	33.913	39.0659	45.7906	46.5759	104.881	65.3774	267.43	61.7484	3.88982	59.1437	32.8637	111.039	74.2944	82.1212	71.1694	221.569	215.566
k141_422590_flag=0_multi=14.6345_len=11119	unknown	Lytic	28.4234	35.9194	4.73872	0	10.1556	20.4064	0	0	1.4312	34.1508	0	0	15.375	9.76373	9.42554	0	4.95032	8.97029	191.586	125.79
k141_532655_flag=0_multi=24.9138_len=27353	Autographiviridae	Lytic	8.8878	12.1677	11.5577	14.3349	6.19237	13.8253	6.8906	0.791656	0.872677	9.91594	22.8382	24.6632	39.0622	27.7827	3.83148	1.39573	0	2.73482	58.971	83.8056
k141_394642_flag=0_multi=17.4496_len=18143	unknown	Lytic	29.479	14.6755	5.80828	0	0	0	0	0	0	44.8488	4.91881	0	0	0	0	0	0	0	116.879	127.2
k141_643462_flag=0_multi=8.9707_len=12160	unknown	Lytic	181.931	101.27	51.9965	41.4581	34.0493	10.8847	1.10713	1.78077	1.30868	176.211	88.0677	44.3824	56.2351	24.5516	0	0	0	0	99.6875	71.4201
k141_91162_flag=1_multi=9.6125_len=12519	Demerecviridae	Lytic	0	5.31709	0	0	0	1.51036	0	0	0	4.3331	0	0	0	0	0	0	0	0	19.9467	71.7104
k141_312303_flag=0_multi=30.6290_len=12832	Kyanoviridae	Lytic	289.865	181.559	164.245	26.1913	8.79987	5.89409	0	0.843756	3.72044	200.802	34.7732	42.0581	53.2901	2.11508	6.12546	5.95034	13.9408	1.9432	212.866	190.112
k141_145925_flag=1_multi=11.8300_len=18501	Demerecviridae	Lytic	177.393	71.9578	74.0465	27.2489	27.4655	0	2.91071	1.17043	1.72029	187.652	69.9426	31.6017	46.2015	42.5426	12.7456	0	1.48756	0	60.978	72.7421
k141_173717_flag=1_multi=9.0000_len=10798	unknown	Lytic	0	6.16453	24.398	15.5625	0	8.75544	0	2.00539	0	5.02372	103.308	54.1456	59.3703	20.108	9.70574	0	0	0	0.299364	65.593
k141_339720_flag=0_multi=13.1292_len=11653	unknown	Lytic	2.08623	11.4245	0	0	3.23007	6.49043	2.31061	0	0	4.65512	26.804	54.0323	14.6705	4.65815	4.49681	0	0	4.27961	17.2681	108.442
k141_395297_flag=1_multi=10.0000_len=10685	Kyanoviridae	Temperate	18.2018	0	0	5.24235	7.04539	0	7.55981	2.02659	7.44668	15.2305	25.0562	42.0909	0	0	7.35629	0	3.86354	2.33366	58.6909	38.737
k141_533474_flag=0_multi=8.0490_len=14209	Autographiviridae	Lytic	5.13283	18.7387	55.623	17.7399	11.9206	22.6223	12.3172	14.4778	7.83974	11.4532	81.6486	34.8171	3.00786	0	64.5382	17.4645	11.6213	11.4068	23.4893	62.8951
k141_478190_flag=0_multi=15.0000_len=10283	unknown	Lytic	87.4744	16.1832	10.2479	16.3419	0	0	5.2369	8.42329	8.51158	21.1013	0	8.74728	0	0	0	11.138	12.0437	1.21245	66.4865	63.5798
k141_201614_flag=0_multi=7.9838_len=13496	Mesyanzhinovviridae	Lytic	37.828	2.46609	0	10.3761	0	25.2185	0	0.802244	0	24.1165	0	0	31.6677	0	0	0	0	0.923798	45.3288	63.145
k141_174181_flag=1_multi=7.9274_len=18273	Straboviridae	Lytic	25.278	7.28557	5.76696	0	3.0898	0	0	1.18504	1.74176	11.8746	4.88381	4.92247	4.6778	11.8823	2.86769	2.08928	4.51835	0	60.1025	57.4512
k141_340034_flag=1_multi=11.0000_len=10846	Straboviridae	Lytic	24.656	42.9607	29.148	5.16454	0	3.48667	0	0.998256	1.46723	10.003	0	0	7.88101	0	0	10.5599	7.61238	6.89706	40.1608	31.4143
k141_589129_flag=1_multi=11.6404_len=11771	unknown	Lytic	4.13062	0	17.905	4.75869	0	0	0	0	0	52.9972	15.163	34.3868	7.26169	0	4.45173	0	0	0	34.0527	53.8845
k141_533625_flag=0_multi=9.8202_len=11068	unknown	Lytic	43.9299	45.1061	66.6478	43.0181	5.10119	44.4176	6.08184	1.95647	1.4378	17.1541	0	24.3806	0	22.0696	0	0	0	0	139.094	93.8954
k141_561582_flag=0_multi=10.0000_len=10390	unknown	Lytic	9.3593	6.4066	0	0	7.24542	1.81985	14.2532	11.4627	4.59487	0	4.2946	0	0	0	0	0	2.64883	0	53.357	74.1169
k141_9041_flag=0_multi=27.3188_len=11976	unknown	Lytic	52.7789	91.7097	277.176	224.507	191.72	173.673	69.697	40.6829	21.2606	43.0309	89.4207	105.15	78.5113	101.982	63.4451	106.792	119.498	61.4218	151.761	266.101
k141_201848_flag=0_multi=7.1948_len=15215	unknown	Lytic	27.1629	41.5619	114.28	49.7007	8.65855	23.612	7.96351	12.8089	12.028	30.3051	58.6539	82.7654	50.5617	46.3792	18.9423	15.0552	19.8971	15.5691	79.2465	80.6492
k141_506753_flag=0_multi=13.9431_len=10186	unknown	Lytic	7.16006	42.4769	5.17277	21.9967	0	0	0	0	4.68689	18.6394	43.8062	22.0764	25.175	0	0	0	0	0	33.2425	114.4
k141_119729_flag=1_multi=14.6512_len=14174	unknown	Lytic	3.43034	14.0887	7.43471	7.90385	2.65556	4.00203	2.84946	0	0	0	15.7404	0	0	0	0	0	0	0	0	110.611
k141_37085_flag=0_multi=13.6803_len=12571	unknown	Lytic	0	0	0	0	0	0	0	0	0	4.31518	0	0	0	0	0	0	0	0	4.49999	84.5451
k141_479084_flag=0_multi=15.0000_len=13763	unknown	Lytic	65.3563	94.3115	176.105	113.958	97.0878	70.0661	26.411	28.3205	35.844	59.1217	288.546	480.36	189.425	211.005	49.4962	11.0957	15.9973	22.6469	83.4381	117.4
k141_147287_flag=1_multi=15.6758_len=15003	unknown	Lytic	69.677	139.758	98.3347	82.1383	58.9575	59.234	11.6654	15.1549	0	74.1215	279.569	131.898	31.3354	28.9443	31.4345	3.81698	1.83439	0	52.3566	137.561
k141_479396_flag=0_multi=12.9743_len=10420	unknown	Lytic	9.33236	9.58224	45.5094	18.8149	12.643	74.399	1.29201	1.03907	0	5.20596	25.6934	0	28.7112	18.2327	5.02891	3.66386	0	0	21.9484	97.1593
k141_93040_flag=0_multi=11.8189_len=29370	Straboviridae	Lytic	0.827742	5.66604	10.764	11.4432	8.33026	1.28759	1.83354	0.737288	0.54183	28.6284	3.03854	21.4381	13.0966	11.0892	1.78418	3.89963	0	0.849001	27.6532	76.832
k141_175356_flag=1_multi=9.0000_len=14295	unknown	Lytic	15.3058	13.9695	14.7436	5.87771	5.26617	1.32272	0.941781	2.27221	0	60.7162	15.6072	18.8769	8.9693	11.3917	5.49856	2.67068	1.92524	0	36.1243	41.6968
k141_175369_flag=1_multi=9.0000_len=12707	Kyanoviridae	Lytic	28.6977	10.4768	0	2.20408	7.40536	2.97603	8.4758	0	1.25235	21.345	14.0461	3.53932	0	2.13589	0	0	0	0	40.0028	78.9047
k141_147672_flag=0_multi=25.0150_len=12023	Straboviridae	Lytic	52.5726	47.0597	56.9714	18.6358	0	1.57267	1.11975	0	0	90.2372	37.113	29.9254	31.9927	9.0296	6.53763	0	4.57811	0	357.251	229.552
k141_230928_flag=0_multi=9.7556_len=13543	Kyanoviridae	Lytic	10.7705	24.5753	0	0	8.33788	0	0	0.799459	0	56.0766	13.179	0	25.2462	8.01616	3.86925	0	0	0	44.6344	74.2741
k141_120423_flag=0_multi=14.3270_len=26693	unknown	Lytic	9.10755	13.7154	13.8174	45.1172	37.3678	64.4607	8.57404	10.546	7.45212	11.1772	16.7163	20.2184	22.4157	34.5703	8.83399	9.29656	17.012	1.86829	51.7402	107.233
k141_396954_flag=0_multi=17.2092_len=20666	Drexlerviridae	Lytic	12.94	38.6517	137.678	37.9466	3.6427	0	0	0	0	99.7461	71.2519	13.0574	28.953	5.25321	2.53563	1.84735	0	0	14.234	129.023
k141_425215_flag=0_multi=27.8837_len=10353	Autographiviridae	Temperate	65.7493	80.3687	5.08933	62.2204	14.5426	38.3534	33.8097	4.18317	5.37984	57.6362	8.61991	13.0322	4.12815	15.7292	0	3.68757	10.6332	3.61275	38.9509	142.951
k141_618317_flag=0_multi=17.1390_len=12813	Autographiviridae	Lytic	49.3312	54.5484	4.11222	28.416	0	5.90283	0	0	0.620993	38.1031	3.48247	7.02008	13.3423	0	20.4485	0	0	0	112.709	123.82
k141_535759_flag=0_multi=11.4009_len=11094	unknown	Lytic	0	0	0	0	0	0	0	0	0	9.77936	0	0	0	0	0	0	0	0	0	74.1047
k141_148627_flag=1_multi=8.0000_len=13878	Straboviridae	Lytic	78.8288	23.9821	22.7799	8.07243	5.42441	0	1.94016	0.780161	2.86669	29.3159	12.8609	0	6.1592	7.82266	9.43963	16.5056	9.91544	4.49185	51.9423	32.6371
k141_203730_flag=0_multi=14.8580_len=27726	Kyanoviridae	Lytic	21.0437	25.2084	11.4023	0	0.678785	0.681968	0	0	0	44.0214	6.43742	0	6.16587	2.93667	3.77994	4.13086	0	0	57.9154	71.5918
k141_11096_flag=0_multi=17.9840_len=23490	unknown	Lytic	0	0	53.8338	23.8461	6.40953	8.04948	6.87753	2.30461	0	0	22.7949	34.4629	18.1944	13.865	0	0	9.37294	1.06152	81.1918	120.055
k141_480687_flag=1_multi=12.1654_len=10463	unknown	Lytic	6.9705	0	40.2866	0	0	0	0	1.0348	4.56281	36.292	0	17.1936	32.678	25.9397	0	0	0	0	76.2332	93.8067
k141_260179_flag=1_multi=9.0000_len=10669	Straboviridae	Lytic	13.6718	37.4344	0	47.252	7.05595	3.54452	0	7.10372	1.49157	35.5912	12.5469	8.43081	32.047	15.2633	9.82309	7.1567	6.44889	10.5172	45.9021	31.1733
k141_646570_flag=0_multi=17.8603_len=47557	Demerecviridae	Lytic	35.2723	23.7946	8.86344	7.65596	0.791471	0.795182	1.69852	0.910661	4.51738	46.7668	5.62957	3.78276	0	0	7.71304	0	3.47221	4.19457	86.6471	125.369
k141_315645_flag=1_multi=11.0000_len=28692	unknown	Lytic	0	0	0	0	0	0	0	0	0	0	0	0	0	0	0	0	0	0	41.8826	60.5373
k141_38820_flag=1_multi=10.9499_len=14962	Straboviridae	Lytic	42.2457	48.938	24.651	3.74379	3.77356	6.31875	25.1943	15.1964	22.3356	29.0047	8.94685	6.01178	11.4259	0	45.5298	28.0679	34.9488	8.33283	110.671	75.6541
k141_204095_flag=0_multi=18.9625_len=10689	Demerecviridae	Lytic	31.8412	40.4781	9.8587	15.7212	0	0	0	1.01292	1.48878	20.2998	4.17447	0	11.9951	0	2.45118	0	0	1.16639	104.712	128.568
k141_646846_flag=1_multi=15.9567_len=12971	unknown	Lytic	71.2212	41.0544	32.497	23.7515	0	7.28866	0	0	0	10.4553	27.5204	13.8691	13.1798	10.4621	4.03988	2.94329	0	0	65.2937	99.1781
k141_592045_flag=0_multi=35.9804_len=39763	unknown	Lytic	19.5646	20.0884	30.4772	0	0.946608	0.475523	0	0	0	91.4038	11.2217	0	4.29934	2.73025	5.27136	1.92025	0	0	7.60109	235.201
k141_343111_flag=1_multi=8.0000_len=11326	Straboviridae	Lytic	15.0252	35.2629	9.30422	0	0	0	0	0	0	23.9476	19.6985	0	0	0	0	3.37078	4.85984	7.70555	46.6643	26.9239
k141_343334_flag=1_multi=9.0000_len=12858	Kyanoviridae	Lytic	17.0164	2.58845	0	0	20.4915	14.7054	0	0	3.71292	25.3132	0	0	0	0	0	0	0	0	30.9225	63.369
k141_95362_flag=0_multi=59.8241_len=12010	Drexlerviridae	Lytic	28.339	22.1697	26.323	0	0	0	0	0	0	88.0765	37.1532	33.7025	17.793	27.1181	2.18157	3.1788	6.87459	0	116.409	222.895
k141_536997_flag=0_multi=12.0687_len=14875	Autographiviridae	Lytic	102.963	109.636	38.9639	128.033	10.1217	36.8631	16.2911	9.46232	2.13964	140.402	68.9937	30.2347	17.2391	10.9475	14.0911	6.41637	13.8763	3.35263	29.12	95.0114
k141_564847_flag=1_multi=13.5931_len=18449	Demerecviridae	Lytic	7.90638	0	0	0	0	0	0	0	0	7.35082	4.83722	0	30.1156	5.88449	0	0	0	0	21.9456	88.374
k141_122478_flag=0_multi=14.9489_len=22624	unknown	Lytic	32.2367	38.2488	86.1706	13.6174	8.31859	6.68608	1.7852	7.65706	5.62714	51.5511	39.4457	33.7942	20.78	16.795	16.2133	22.7809	15.2058	6.61293	56.7951	97.2616
k141_288812_flag=1_multi=9.1954_len=16914	Kyanoviridae	Lytic	18.6851	47.2257	77.879	74.5139	33.3806	51.4236	23.0826	16.0031	8.46766	40.0897	29.0192	114.337	25.2682	40.1158	37.1772	20.3143	29.2884	10.3196	64.9794	65.6731
k141_316670_flag=0_multi=13.0000_len=10378	unknown	Lytic	18.7402	19.242	86.3102	35.0833	30.8287	41.9049	49.2951	21.9087	22.2342	15.6811	68.7931	86.6721	49.4184	10.4609	35.3449	40.4656	26.5189	3.60404	81.2183	94.4183
k141_427340_flag=0_multi=19.0000_len=13354	unknown	Lytic	203.895	209.354	86.8037	50.3351	19.7304	25.4866	0	0	11.9167	373.719	163.728	60.6211	25.6035	14.2268	47.0882	0	4.12181	1.86724	41.4536	122.761
k141_95816_flag=0_multi=11.1762_len=10037	unknown	Lytic	9.68847	6.63192	0	11.1616	20.6257	24.4901	4.02394	7.55102	1.58549	0	8.89129	0	34.0649	21.6325	0	19.0183	5.48397	0	24.7182	113.262
k141_233484_flag=1_multi=11.0000_len=12101	Herelleviridae	Lytic	0	0	0	0	0	0	0	0	0	2.24139	0	0	0	0	0	0	0	0	0	71.2979
k141_455269_flag=0_multi=15.9909_len=36441	unknown	Lytic	36.692	43.8394	53.4981	21.5198	5.16451	12.4529	2.95552	0.891338	3.7119	133.974	72.2438	41.9615	43.3943	32.0258	24.4456	0	1.13284	1.36852	7.85048	105.527
k141_205703_flag=0_multi=11.9472_len=11592	Kyanoviridae	Lytic	14.6804	17.2269	49.999	45.9057	21.1059	30.9918	40.6484	9.34013	0	21.0583	30.7943	100.874	92.1728	72.5813	9.04094	14.8204	14.245	4.30213	47.9638	168.99
k141_178421_flag=0_multi=19.0000_len=10138	Kyanoviridae	Lytic	28.7758	39.3951	0	0	9.2819	3.73017	1.32795	7.47579	0	24.0785	17.6054	4.43619	29.5099	16.0628	5.1688	1.88289	0	0	111.28	106.118
k141_233978_flag=0_multi=20.9167_len=10758	unknown	Lytic	239.537	210.373	137.137	7.81017	6.99758	17.576	2.50284	1.00642	2.95846	443.731	327.668	108.694	83.4275	20.1827	31.6609	7.09749	0	0	50.0295	154.728
k141_205995_flag=0_multi=17.8641_len=15614	unknown	Lytic	0	0	0	0	0	0	0	0	1.01919	3.4742	5.7155	0	0	0	0	0	0	0	48.2893	158.843
k141_510982_flag=0_multi=21.9596_len=11582	unknown	Lytic	0	0	0	0	0	0	0	0	0	25.7601	0	0	0	0	0	0	0	0	65.9373	172.225
k141_123844_flag=0_multi=15.0477_len=11094	unknown	Lytic	0	0	18.9976	10.0982	0	0	2.42703	0	0	34.2278	0	0	0	0	0	0	1.24037	0	13.2576	119.696
k141_649143_flag=0_multi=23.5289_len=11815	unknown	Lytic	0	50.7052	26.7574	61.6326	58.9369	102.423	26.2077	23.826	5.38758	9.18258	83.086	26.6457	7.23465	36.7543	57.6569	9.6938	11.6468	10.5523	95.3481	174.679
k141_456073_flag=0_multi=17.9234_len=19012	Straboviridae	Lytic	15.3445	14.0048	33.2568	10.312	4.9495	0	1.41624	0.569487	2.51108	2.85326	0	0	0	4.28267	1.37811	0	0.723788	0	87.3934	66.2531
k141_511400_flag=0_multi=7.0000_len=11622	unknown	Lytic	6.27537	63.0021	27.2018	77.1152	51.8189	48.8081	23.1677	30.7429	13.008	2.33377	15.3574	15.479	44.1287	51.3764	15.7808	47.6314	37.8886	47.2013	103.885	73.4668
k141_538776_flag=0_multi=10.8112_len=15417	Rountreeviridae	Lytic	18.9226	17.2704	61.5176	39.9663	19.5317	36.7936	14.8451	8.42738	3.61273	14.0744	46.3083	23.3374	13.8609	10.5626	6.79786	0	27.6695	4.04345	48.9587	52.376
k141_621489_flag=0_multi=18.9956_len=90645	Straboviridae	Lytic	79.9229	80.4107	41.2706	18.8476	1.24574	2.08597	2.0793	3.4639	3.07228	116.697	52.6719	6.45004	12.2589	3.89243	8.09331	12.6353	6.52775	2.61332	78.8119	125.961
k141_234987_flag=1_multi=15.4616_len=13595	unknown	Lytic	1.78822	0	3.87568	4.12023	11.0747	2.78165	0	0	0	5.98523	0	3.30814	6.28741	0	0	0	0	0	15.3364	129.438
k141_483646_flag=0_multi=50.1955_len=113849	unknown	Lytic	15.8016	12.8628	7.86767	2.95205	2.4796	2.98947	0.709506	0.760803	0.698889	16.4384	10.1902	11.0609	4.12938	3.33749	1.38081	0.335334	0	0.10951	141.512	342.728
k141_318908_flag=0_multi=22.4963_len=10163	Autographiviridae	Lytic	9.56835	9.82455	31.1068	8.26743	18.5181	13.0235	0	2.13069	0	5.33761	8.78106	8.85056	16.8213	5.34108	5.15608	0	0	0	71.1679	92.8952
k141_14932_flag=0_multi=19.6107_len=65780	unknown	Temperate	0	0	0	0	0	0	0	0	0	10.7206	2.71334	6.83705	1.29944	1.65039	0	0	0	0	0.122854	123.966
k141_207607_flag=0_multi=20.9136_len=25304	unknown	Lytic	8.64674	5.26119	0	3.3205	7.43755	2.24173	1.06408	0	0	53.5944	59.9554	12.4415	40.5362	8.58069	9.31891	0	0	0	27.5297	164.826
k141_568159_flag=0_multi=20.9168_len=15750	Kyanoviridae	Lytic	9.26125	29.5843	113.743	28.4518	19.1187	24.0105	8.54778	2.0623	3.03115	5.1663	31.1638	39.977	13.5678	31.018	26.6165	2.42396	5.24215	0	114.575	125.409
k141_292078_flag=0_multi=24.4411_len=14853	unknown	Lytic	6.54704	0	7.09484	0	5.06833	0	0	0	0	58.4352	0	0	0	10.9637	7.05599	0	0	0	1.14258	163.259
k141_180680_flag=1_multi=8.9850_len=11839	unknown	Lytic	0	0	35.6042	0	0	0	0	0	0	9.16397	7.53796	0	0	0	0	0	0	0	0	56.1851
k141_623387_flag=0_multi=14.7412_len=15287	unknown	Lytic	31.8058	17.4173	31.0204	62.2913	77.56	71.7392	21.136	8.49905	0	1.77426	58.3776	29.4199	55.9151	46.1607	1.71392	4.99476	3.60061	0	144.16	140.219
k141_430795_flag=0_multi=9.9605_len=14719	unknown	Lytic	23.1232	24.873	25.058	0	2.55724	5.13846	1.8293	5.1491	0.540579	46.0681	66.6934	12.2221	8.71092	0	7.12022	2.59375	0	0.84704	30.5267	72.5939
k141_181204_flag=1_multi=11.4223_len=14131	unknown	Lytic	0	4.71054	7.45734	35.6755	7.99094	26.7614	0	0	0	176.585	37.892	31.8266	24.1957	3.8413	9.27063	0	5.84275	0	2.11598	76.5928
k141_43427_flag=0_multi=16.9714_len=12444	Guelinviridae	Lytic	80.0982	147.101	29.6391	2.25067	3.02475	0	0	0	2.55763	302.966	64.5433	57.826	54.9517	13.0862	4.21097	9.20381	2.21161	0	33.8346	104.424
k141_513748_flag=1_multi=17.5692_len=40680	Straboviridae	Lytic	42.4303	44.18	25.9045	2.75391	6.93952	5.57765	3.30943	2.39537	3.5207	12.0014	6.58126	13.2667	11.5567	6.67176	1.9322	3.28468	6.08878	4.29071	191.981	127.893
k141_126441_flag=0_multi=17.9814_len=20255	unknown	Lytic	128.425	110.092	135.269	30.4202	14.8664	0	0	3.20723	1.96415	271.833	125.569	39.9671	61.1909	14.7395	31.045	5.65452	0	0	51.628	122.327
k141_375578_flag=0_multi=12.4616_len=12043	Herelleviridae	Lytic	40.3733	38.6907	210.007	83.7218	101.578	54.9521	15.6505	33.2643	12.5533	11.2609	163.026	130.706	99.3675	63.1022	43.5118	33.286	27.423	20.7051	101.26	91.6955
k141_293008_flag=1_multi=12.9359_len=22219	Demerecviridae	Lytic	19.6946	2.99584	0	7.56306	5.08213	0	0	0	0	65.9186	8.03294	20.2413	3.84704	4.88604	0	2.57735	0	0	41.245	99.1076
k141_154291_flag=0_multi=10.8879_len=11011	unknown	Lytic	0	0	0	0	0	0	0	0	1.44524	9.85308	0	0	0	0	0	0	0	0	20.0364	86.4795
k141_431280_flag=1_multi=17.0000_len=93388	Casjensviridae	Lytic	35.9242	19.9577	7.89885	11.6962	10.8823	12.1482	2.59487	0.695619	2.55604	60.1198	12.9006	9.15009	5.9494	8.13745	1.68334	0	2.06289	0.267006	129.872	58.4619
k141_652207_flag=0_multi=22.9047_len=10337	unknown	Lytic	206.96	196.403	61.1665	35.2225	0	3.65836	0	4.18964	3.07895	367.343	133.815	39.1571	49.6144	44.635	17.7425	36.9328	5.32481	0	56.3669	143.173
k141_181823_flag=0_multi=9.5774_len=11950	unknown	Lytic	4.06875	0	0	0	0	0	0	0	0	43.1245	0	0	0	0	0	0	0	0	16.5008	81.3173
k141_652283_flag=0_multi=11.3852_len=10717	unknown	Lytic	29.4896	43.4779	88.4965	73.1738	87.8044	119.974	38.9424	47.4828	15.5913	25.3084	79.1078	62.9479	63.807	83.5723	58.6746	122.9	41.0881	20.9402	78.9508	116.85
k141_486184_flag=1_multi=6.0000_len=11128	unknown	Lytic	21.8465	41.8721	28.4093	5.03366	0	0	0	7.78367	0	36.5606	88.2154	72.7475	103.697	68.2908	0	0	0	0	35.7298	40.1179
k141_209407_flag=0_multi=10.0000_len=15898	unknown	Lytic	9.17504	18.8414	49.7136	15.8552	4.73518	24.9763	2.54046	4.76724	2.00196	30.7092	42.1005	5.65784	24.1948	23.9005	14.8324	2.4014	0.865558	3.92112	20.638	71.8649
k141_17082_flag=0_multi=9.9910_len=22121	Kyanoviridae	Lytic	5.49496	13.541	28.5827	2.53219	0	0	0	0	0	147.135	127.079	148.416	34.7767	1.22692	2.36885	0	1.24413	0	7.08729	60.9484
k141_44425_flag=1_multi=11.0000_len=31191	unknown	Lytic	0	0	0	0	0	0	0	0	0	15.6524	0	0	0	1.74029	0	0	0	0	0	70.5214
k141_266540_flag=1_multi=10.4045_len=14203	unknown	Lytic	22.2517	44.5232	74.1953	69.0175	25.1764	38.6073	20.8534	15.2462	13.4452	47.7418	9.42497	66.497	6.01826	38.2183	47.9629	6.71996	23.2525	10.5338	78.0083	90.2889
k141_376481_flag=0_multi=17.0791_len=20114	Drexlerviridae	Lytic	26.5903	26.4749	57.6303	82.1532	29.0056	74.2642	54.2151	13.9954	5.14259	90.3473	79.8625	33.5394	21.2482	13.4934	13.0261	10.4393	6.84133	2.47938	11.3301	117.242
k141_376574_flag=1_multi=8.0000_len=22272	unknown	Temperate	15.2816	8.96614	11.8287	7.54507	1.69001	0	1.20894	1.45839	1.42902	24.3562	6.01036	16.1545	7.67577	0	0	0	0	0	54.79	56.2269
k141_294125_flag=1_multi=10.6654_len=10374	unknown	Lytic	35.1515	0	0	10.799	48.982	67.4383	81.7576	102.28	57.5244	5.22905	17.2049	8.67055	37.0781	54.9407	60.6146	29.4408	78.2609	26.4398	44.2471	74.4664
k141_182675_flag=0_multi=14.0601_len=14394	unknown	Lytic	62.4913	23.1223	7.32108	7.78304	0	5.25448	0	1.50439	6.63341	244.963	68.1993	24.996	17.8152	1.88556	14.562	0	1.912	1.73233	74.2782	92.8759
k141_294374_flag=0_multi=16.0000_len=15359	unknown	Lytic	69.6448	52.007	27.4444	43.7642	17.1547	13.5419	7.01231	7.04934	2.07221	68.8716	95.8715	58.5639	75.1315	31.8076	8.52941	11.1855	3.58374	0	84.5018	75.8163
k141_349083_flag=0_multi=16.5023_len=15902	Straboviridae	Lytic	0	4.18593	0	0	0	0	0	1.36173	4.00291	10.2338	0	0	0	0	0	2.40079	0	0	89.4425	72.5627
k141_515515_flag=1_multi=9.5953_len=10831	Demerecviridae	Lytic	98.7605	64.5304	77.8356	49.131	3.47521	0	0	0	2.93852	70.1178	16.479	29.0665	27.6217	15.035	4.83808	7.04966	2.54097	0	32.4567	42.1189
k141_377263_flag=1_multi=10.0000_len=11231	Kyanoviridae	Lytic	62.7738	77.0492	42.2232	54.8625	23.46	30.3044	7.19228	20.2447	6.37619	65.2055	43.7032	8.00893	38.0542	28.9991	39.6591	0	1.22524	8.88084	146.142	68.7117
k141_653611_flag=1_multi=8.0000_len=10029	unknown	Lytic	0	0	0	0	0	0	0	0	0	0	8.89838	0	0	0	0	0	0	0	0	49.7034
k141_487651_flag=0_multi=7.2959_len=12252	Straboviridae	Lytic	39.6846	10.8659	8.60101	18.2875	6.1443	26.2357	5.49411	0	2.59771	26.5652	3.64193	36.7076	69.7661	2.21521	4.27696	0	2.24627	2.03519	33.9031	32.2561
k141_433316_flag=1_multi=8.0000_len=16937	Kyanoviridae	Lytic	34.4488	11.7904	55.9967	0	0	0	0	0	0.939573	38.4338	71.1322	71.6952	15.1404	0	6.18779	0	4.87476	0	46.903	50.7963
k141_323197_flag=0_multi=9.9619_len=20437	Kyanoviridae	Lytic	10.7059	30.9421	0	2.74084	0	8.32677	0	1.05956	0	31.8517	0	17.605	0	2.65604	0	1.86805	0	0	40.0172	78.8225
k141_488525_flag=1_multi=10.0000_len=14394	unknown	Lytic	16.8895	9.24894	7.32108	23.3491	5.22995	0	0	0	1.10557	3.76866	0	24.996	8.90761	18.8556	3.6405	0	0	0	49.968	62.7647
k141_129276_flag=1_multi=8.0000_len=19405	Straboviridae	Lytic	15.0337	0	0	14.433	0	0	0	4.46363	0	29.3524	0	9.27063	0	0	0	0	0	0	48.6421	52.8426
k141_157025_flag=1_multi=10.0000_len=14974	unknown	Lytic	25.9765	24.4494	7.03751	0	0	1.26274	0	0	0	34.4155	5.95979	6.00696	5.70839	0	3.49948	0	0	0	48.4643	38.1769
k141_572276_flag=0_multi=13.3737_len=11800	Demerecviridae	Lytic	2.06024	22.5643	26.7914	49.8435	23.9237	22.4335	4.56365	15.5983	6.74303	16.0899	49.1587	22.8682	43.4631	29.9008	22.2039	12.9415	24.4893	11.6223	49.5838	73.1856
k141_351213_flag=1_multi=11.0000_len=11486	unknown	Lytic	8.46623	0	0	0	0	0	0	0	0	0	0	15.6622	0	0	0	0	0	0	37.712	66.0535
k141_75345_flag=0_multi=6.4477_len=10077	unknown	Lytic	7.23751	0	26.1436	22.2346	0	0	0	0	0	10.7663	17.712	8.9261	8.48242	21.5467	0	0	0	0	13.5531	46.8036
k141_627513_flag=1_multi=8.0000_len=10993	Autographiviridae	Lytic	163.649	45.4139	38.3443	22.9296	11.984	15.4802	7.348	0	5.06663	88.8229	24.3542	45.0028	11.6634	9.87564	0	0	3.75529	0	61.3102	49.4872
k141_20575_flag=0_multi=12.0502_len=12255	Autographiviridae	Lytic	37.6911	57.0321	21.4973	2.28538	0	0	0	5.3009	1.29854	37.6248	7.28208	14.6794	27.8996	4.42933	8.55182	6.2305	0	0	45.7646	78.9617
k141_241325_flag=0_multi=8.4630_len=11693	unknown	Lytic	74.8472	5.69269	171.232	14.3713	8.04754	27.49	40.2973	3.70378	4.08284	6.95879	49.6085	23.0775	0	2.32111	0	6.52996	4.70731	4.26497	83.1425	61.6156
k141_103884_flag=1_multi=13.0000_len=64382	Kyanoviridae	Lytic	41.5362	32.0509	39.2829	42.1967	24.2624	9.10434	10.6645	8.40847	8.89826	46.3412	26.3365	16.7652	29.8723	8.43115	7.73217	6.8193	8.97684	7.74601	73.9699	65.8551
k141_352108_flag=0_multi=20.9717_len=15691	unknown	Lytic	37.1843	25.4533	0	0	0	0	0	0	0	69.143	11.3749	2.86624	10.8951	0	0	4.86615	0	0	48.5673	133.447
k141_573702_flag=0_multi=12.4224_len=28526	Kyanoviridae	Lytic	22.158	35.0021	22.165	45.1635	9.89623	12.594	0.943894	9.10923	12.5519	21.8688	28.156	25.2256	5.99295	16.1744	1.83697	14.0525	17.366	4.80766	52.495	50.0002
k141_270533_flag=0_multi=16.9503_len=14303	Autographiviridae	Temperate	42.4925	34.9042	25.7868	11.7488	0	14.5417	3.76502	1.51396	0	22.7558	24.9575	6.28877	11.9524	3.79511	0	0	0	0	84.356	112.854
k141_518844_flag=0_multi=13.9908_len=31340	Casjensviridae	Lytic	1.55142	2.12395	1.68123	3.57464	3.00255	2.4133	0.859142	1.03641	2.28497	7.78901	7.11885	2.87008	6.81855	8.66009	11.7042	3.04542	1.7563	3.58035	52.6035	104.332
k141_186166_flag=1_multi=29.0000_len=36805	Mesyanzhinovviridae	Lytic	31.7054	23.5115	2.86319	0	0	0	0	0	0	25.7929	6.0618	0	8.12854	0	0	0	0	0	158.179	95.7779
k141_628702_flag=1_multi=9.7668_len=14517	Kyanoviridae	Lytic	3.34929	9.17057	0	3.85855	0	2.60498	1.85476	1.49164	4.38481	136.391	95.2848	30.9803	23.5524	54.2179	21.6579	15.779	3.7916	6.01179	17.8138	68.8427
k141_104715_flag=0_multi=16.7578_len=12361	unknown	Lytic	57.0353	21.5402	12.7878	2.26578	6.09012	9.17801	6.53479	3.50363	5.1496	17.554	25.2687	0	31.1179	2.19567	0	0	10.0191	4.03449	144.289	90.2575
k141_270915_flag=0_multi=9.9829_len=11728	Autographiviridae	Temperate	20.7288	0	26.9559	16.7165	0	19.3468	18.3667	4.61591	0	13.8761	0	0	14.5766	9.25673	4.46805	0	0	0	37.8985	72.7335
k141_602384_flag=0_multi=19.0000_len=11742	unknown	Lytic	169.774	181.406	80.7713	33.3931	32.0558	16.1031	0	3.68833	3.38817	348.798	281.208	49.7925	112.834	46.2285	29.0077	3.25136	9.37533	0	42.3957	114.614
k141_519570_flag=0_multi=16.9646_len=10082	unknown	Lytic	9.64523	0	0	0	0	0	0	0	0	0	0	0	0	0	0	0	0	0	35.8298	148.165
k141_491719_flag=0_multi=35.9773_len=34013	Autographiviridae	Temperate	0	0	6.19643	9.88115	7.19313	18.3451	4.74974	0	0	81.3381	36.7326	18.5117	23.8743	19.1508	1.54063	1.12244	0.80914	0	31.624	234.056
k141_464570_flag=0_multi=15.8174_len=58340	Mesyanzhinovviridae	Temperate	19.1686	7.41635	9.93466	3.84056	0.645183	1.94463	0	0.742344	0.272773	61.8335	9.17812	20.0433	8.05838	3.72173	1.79641	2.61758	1.41522	0	35.9879	100.023
k141_409182_flag=1_multi=10.0000_len=13311	Zierdtviridae	Lytic	3.65274	22.5032	0	29.457	5.65547	8.52298	2.0228	8.94733	1.79328	12.2259	50.2828	47.3021	118.799	28.5456	0	5.73622	9.30402	3.74655	1.27495	66.5273
k141_629925_flag=0_multi=12.9878_len=21836	unknown	Lytic	91.2935	36.5807	36.1947	17.9567	0	3.46368	0	2.97502	2.9151	134.15	12.2607	20.5963	35.2306	4.97174	11.9988	0	0	0	58.5116	69.043
k141_187654_flag=1_multi=8.9940_len=14733	Peduoviridae	Lytic	9.90054	9.03612	7.15262	0	1.2774	5.13357	3.65513	8.08375	0	0	0	6.10522	8.70265	3.68434	3.55673	5.18257	12.142	0	46.0208	35.7105
k141_243860_flag=1_multi=8.3569_len=13738	unknown	Lytic	10.6176	0	15.3413	12.232	0	6.88173	0	0	0	0	6.49599	3.2737	6.22197	11.8536	0	0	0	0	27.2358	59.4875
k141_575562_flag=0_multi=17.0000_len=74236	Straboviridae	Lytic	59.2738	60.0764	34.0685	8.30002	2.02813	0.764113	1.45081	1.16677	0.750275	48.5932	14.4257	5.45244	13.8171	5.84961	0	0.257135	1.11218	0	52.623	58.9538
k141_327399_flag=0_multi=13.0000_len=15665	Kyanoviridae	Lytic	15.5192	0	0	0	0	0	0	0	0	13.8515	0	40.1939	0	0	0	0	0	0	22.6989	90.0641
k141_575995_flag=1_multi=11.0000_len=13209	unknown	Lytic	0	0	0	0	0	0	0	0	0	0	6.75614	0	0	0	0	0	0	0	0	72.7048
k141_78913_flag=0_multi=14.4036_len=19959	unknown	Lytic	24.3607	25.013	10.5596	9.82268	0.942932	4.73677	0	0.542466	1.99328	10.8715	11.1782	6.75998	14.9893	2.71965	3.93817	3.82558	1.37889	0	150.824	114.73
k141_327608_flag=0_multi=16.7645_len=18961	Mesyanzhinovviridae	Lytic	15.3858	17.553	2.77885	1.4771	0	1.99443	0.710024	1.14204	0	22.8875	18.8264	30.8351	0	1.4314	11.0545	0	0	0	87.5006	116.995
k141_493146_flag=0_multi=8.9888_len=15922	unknown	Lytic	0	16.7227	0	0	15.3661	11.8755	8.45544	0	1.99894	3.40699	0	0	0	0	6.58225	0	0	1.56608	48.1165	66.3429
k141_107095_flag=0_multi=10.9933_len=14146	unknown	Lytic	6.87425	18.8222	29.7977	3.95975	0	0	0	0	0	32.5952	0	0	36.2551	3.83723	0	0	0	0	33.5913	75.1894
k141_438501_flag=0_multi=16.7830_len=57899	Straboviridae	Lytic	59.2035	42.5377	27.3009	14.0281	0	3.91887	1.39513	0.747998	1.23683	61.3676	18.496	12.4283	23.6211	5.62512	7.6929	0	0	0	55.7329	56.5158
k141_521695_flag=1_multi=10.5665_len=10111	unknown	Lytic	38.4702	65.8338	57.3225	77.5595	63.2855	125.294	38.6134	34.2663	18.8866	64.3807	39.718	93.4089	54.9504	85.8969	44.0521	64.1891	17.6925	30.8268	122.847	67.7979
k141_493622_flag=1_multi=11.0000_len=13577	unknown	Lytic	21.487	14.7082	15.5233	8.25139	5.54467	0	1.98317	0	1.1721	11.9863	0	0	0	0	0	0	0	0	39.2252	43.3628
k141_438941_flag=0_multi=40.2103_len=17962	unknown	Lytic	1959.81	1339.67	633.615	145.01	45.054	32.6331	7.49513	28.3305	81.508	765.582	201.219	120.185	273.63	40.7972	10.2107	55.2618	1.5322	0	449.778	273.94
k141_466624_flag=1_multi=10.0000_len=13620	Kyanoviridae	Lytic	14.2795	4.88727	0	2.05633	0	8.32962	0.988455	0	0	39.8283	0	0	0	0	0	0	0	0	33.4646	77.6753
k141_273989_flag=1_multi=13.0000_len=14083	unknown	Lytic	34.525	4.72659	0	0	5.34545	1.34263	1.91192	0	0	167.557	25.3474	19.161	0	0	24.1858	0	0	0	17.2725	94.3495
k141_355880_flag=1_multi=11.0000_len=10636	unknown	Lytic	0	0	0	5.26651	0	0	0	0	0	5.10024	8.39055	8.45696	16.0732	20.4142	0	3.58945	2.58756	0	0.303924	69.5738
k141_605371_flag=0_multi=15.4455_len=12791	unknown	Lytic	20.9068	28.6221	61.7893	81.0155	30.8983	60.6081	16.8403	27.0867	12.4412	19.0843	0	42.1929	20.0479	31.8279	12.2902	22.3853	8.60646	0	55.5351	123.206
k141_577003_flag=0_multi=21.9898_len=45607	Kyanoviridae	Lytic	8.52879	6.56787	9.24241	0	4.12656	3.31673	6.49419	4.74799	1.57018	42.8193	7.82703	3.94449	1.87422	5.3559	6.31936	0	0	0	88.4026	145.172
k141_660112_flag=0_multi=10.9740_len=17059	unknown	Lytic	0	0	0	0	0	0	0	0	0	3.17991	2.61568	0	0	0	0	0	0	0	0	76.3645
k141_134967_flag=1_multi=17.9838_len=19650	Straboviridae	Lytic	35.8785	6.77502	0	2.85061	3.83104	0	0	0	1.6197	24.8455	0	29.7539	13.05	12.4309	0	0	0	0	45.4035	79.993
k141_660260_flag=3_multi=14.0003_len=52402	Mesyanzhinovviridae	Lytic	15.7736	6.35134	0	0	0	0	0	0.413232	0.455523	13.4575	0	0	1.63119	0	0	0	2.10078	0.951688	90.233	48.1833
k141_522850_flag=0_multi=12.9937_len=42311	unknown	Lytic	1942.06	2066.43	1204.2	158.865	18.6817	33.0696	6.36371	15.8654	66.0072	2546.85	1165.33	636.702	798.996	116.745	61.3047	39.7014	20.4893	5.89331	68.8741	76.0109
k141_25763_flag=1_multi=14.0000_len=15921	Demerecviridae	Lytic	154.223	98.2519	69.4985	10.5548	8.2746	0	0	4.76035	1.99907	173.767	78.4741	87.5698	45.6352	27.2754	9.874	2.39793	1.72862	0	58.4743	68.0325
k141_135676_flag=0_multi=10.8332_len=10061	Kyanoviridae	Lytic	12.0817	26.4644	10.4741	5.56749	0	0	0	0	0	32.3503	57.6555	0	12.7439	0	0	0	2.73544	3.7176	30.6835	47.848
k141_190407_flag=0_multi=12.9818_len=14611	unknown	Lytic	1.66387	0	14.4247	7.66745	1.28807	0	0	0	2.72287	12.9944	9.16178	3.0781	2.9251	1.85755	1.79321	1.30646	0	5.11981	163.164	100.401
k141_606479_flag=0_multi=10.5311_len=10698	unknown	Lytic	45.4492	43.5551	29.5512	60.2138	29.9065	28.2793	21.3934	12.1448	7.43763	30.4241	16.6838	21.0199	47.9402	20.2959	4.89823	39.2551	25.7256	0	134.538	88.5536
k141_246525_flag=0_multi=33.4894_len=37255	Kyanoviridae	Lytic	370.649	283.197	161.23	34.5815	21.217	27.9145	87.8124	79.3395	86.0712	165.265	80.247	25.3511	25.2383	88.15	185.666	138.343	140.728	84.3331	286.659	249.681
k141_52902_flag=0_multi=18.2924_len=18436	unknown	Lytic	42.1971	48.7428	5.71597	0	0	0	0	0	0	51.492	4.84063	0	4.63644	2.94432	5.68467	4.14162	0	1.35253	91.9649	131.044
k141_190713_flag=1_multi=10.0000_len=10799	Autographiviridae	Lytic	18.0097	0	58.5497	12.9675	0	8.75462	7.48	4.0104	7.36807	17.5814	16.5278	24.9879	15.8306	5.02653	0	3.53527	7.64551	0	31.6548	34.2618
k141_524100_flag=0_multi=15.4148_len=12144	unknown	Lytic	300.281	221.992	169.211	18.4501	0	0	1.10859	0	1.3104	1201.6	264.551	25.9238	193.563	15.6444	86.2999	14.1468	3.39937	4.10658	22.6922	109.481
k141_26689_flag=1_multi=11.0000_len=26974	Casjensviridae	Lytic	39.6558	2.46773	23.4403	1.03831	4.88396	2.80392	0.499101	0	2.35984	61.3371	18.1964	13.3385	20.5977	8.04945	0	0	1.02029	0	28.6115	72.2613
k141_81929_flag=0_multi=8.6751_len=11023	unknown	Lytic	0	0	0	0	0	0	0	0	0	14.7635	0	0	0	0	0	0	0	0	0	54.5902
k141_218827_flag=1_multi=10.7456_len=17626	unknown	Lytic	2.75851	0	2.98932	0	0	0	0	0	0	80.0181	154.424	48.48	4.84951	3.07962	2.97295	0	0.780702	0	8.7113	66.019
k141_110068_flag=0_multi=14.6074_len=13014	unknown	Lytic	7.4722	0	0	0	0	0	0	0	0	0	0	0	0	0	0	0	2.11475	0	32.9736	101.037
k141_110139_flag=0_multi=14.7748_len=10470	unknown	Lytic	83.5901	38.1459	130.844	117.7	12.5826	16.2535	11.5726	24.8185	23.5588	62.1732	12.7854	120.275	40.8201	5.18447	25.0245	12.7623	17.0858	5.95396	379.908	155.412
k141_386081_flag=0_multi=15.0000_len=13308	unknown	Lytic	211.906	207.577	95.0222	0	0	8.5249	0	1.62715	4.78316	878.422	144.176	81.1076	96.3451	40.7886	11.8127	8.60627	6.20408	1.8737	20.5252	91.3506
k141_496424_flag=1_multi=15.4745_len=18190	unknown	Lytic	0	0	0	0	0	0	0	0	0	8.94658	0	0	7.04871	0	0	4.19763	0	0	0	108.006
k141_54706_flag=0_multi=15.9825_len=37892	Casjensviridae	Lytic	8.98213	5.27008	22.2484	15.5218	18.8736	20.9581	2.48705	1.42868	0.419971	27.2004	15.3086	35.6071	31.5814	6.44639	0	0	0	0.658059	118.708	108.889
k141_55144_flag=0_multi=30.9498_len=13279	Kyanoviridae	Lytic	0	0	0	16.8731	9.92092	11.3914	2.02768	0	0	51.0638	6.72053	13.5474	9.65555	20.4388	0	0	0	0	31.0376	222.905
k141_220871_flag=0_multi=9.8235_len=13466	Kyanoviridae	Lytic	16.2481	34.6021	15.6512	0	0	0	0.999759	5.62822	2.36352	72.5108	6.6272	6.67966	50.7812	18.1395	3.89138	4.25265	18.3939	1.85171	55.932	75.7254
k141_365481_flag=0_multi=12.0000_len=11097	unknown	Lytic	966.122	995.74	565.025	111.05	0	13.6312	0	6.82974	44.4553	1583.83	542.834	178.324	300.407	83.1562	4.72211	10.321	9.92027	13.4821	33.5721	43.2344
k141_484188_flag=1_multi=9.9785_len=15233	unknown	Lytic	4626.6	3467.41	2701.42	757.5	285.395	364.933	81.3086	82.4487	131.629	2959.27	2589.44	1600.21	1282.19	776.824	386.998	289.47	409.215	339.66	109.127	55.4108
k141_139094_flag=1_multi=10.0000_len=13216	unknown	Lytic	829.613	1226.43	1487.08	167.416	11.3922	11.4457	11.2054	1.63848	19.2658	1081.56	2400.54	2395.72	1710.71	213.577	61.4573	43.3309	63.5139	17.924	12.9634	7.81424
k141_116830_flag=1_multi=10.0000_len=14045	unknown	Lytic	216.365	556.877	731.542	191.435	5.35991	5.38504	3.83418	6.16708	6.79824	110.076	3291.37	3925.83	775.961	57.9724	42.906	31.2595	41.1497	20.4168	4.31542	1.73693
k141_602798_flag=1_multi=8.0000_len=10975	unknown	Temperate	361.062	600.446	720.134	109.732	0	3.44569	0	3.94609	10.1499	911.928	2020.65	1446.55	876.192	89.0265	69.2318	34.7858	46.3912	13.632	2.87173	6.22383
k141_394100_flag=1_multi=9.0000_len=20230	unknown	Lytic	0	6.58078	0	0	0	0	0	0	0	328.48	3339.4	1607.33	44.3654	18.7825	45.3298	9.43584	16.325	9.86067	0	0.763731
k141_307162_flag=1_multi=12.0000_len=36501	unknown	Lytic	223.12	598.153	890.65	165.737	11.3432	6.73426	1.84416	12.4582	12.8613	177.595	3584.25	4090.69	805.573	104.842	55.9889	46.0208	64.0889	15.3706	2.47968	3.67589
k141_450868_flag=1_multi=11.0000_len=26234	unknown	Lytic	916.496	1576.96	1914.06	229.533	11.4782	12.9736	11.8031	24.7627	25.1739	739.231	1777.42	2583.52	2161.86	207.947	58.925	54.5724	41.9628	24.2375	10.3812	7.06729
k141_448855_flag=1_multi=16.0000_len=32587	unknown	Lytic	97.7296	336.02	1130.21	284.482	25.4113	4.64191	1.65253	10.9643	10.2552	181.447	1545.92	3817.43	5322.17	1959.74	156.784	84.3518	70.9421	23.3382	0.867974	1.19779
k141_227746_flag=1_multi=14.0000_len=11319	Schitoviridae	Lytic	115.98	308.741	1014.79	200.423	0	5.01146	0	1.91308	0	138.982	1257.54	2976.03	4776.43	1824.73	136.57	45.5336	32.8242	27.5369	1.42792	0.646573
k141_492104_flag=1_multi=14.9994_len=25042	Mesyanzhinovviridae	Lytic	1.9416	13.2906	12.6243	116.315	100.706	281.638	302.135	214.449	303.757	2.16621	7.12738	21.5514	218.455	1716.75	1519.18	175.322	37.9157	11.9488	0	0
k141_160517_flag=1_multi=12.4284_len=12803	Autographiviridae	Lytic	0	5.19914	20.5771	142.191	129.357	323.432	598.321	1002.96	421.983	4.23698	0	35.1278	223.658	1047.22	965.922	885.628	622.308	259.031	0	0
k141_492343_flag=1_multi=9.0000_len=13916	unknown	Temperate	13.9757	33.4832	53.0079	215.348	315.109	414.416	769.107	741.464	441.408	0	6.4129	25.8546	218.055	1347.67	2063.52	602.18	242.265	373.598	0	0
k141_310491_flag=1_multi=14.0000_len=41796	Mesyanzhinovviridae	Lytic	2.90827	12.7409	47.9044	113.246	127.43	345.176	389.749	257.492	293.363	3.89363	17.0814	25.8249	218.827	2222.77	2146.4	241.6	38.5203	18.4944	0.0386704	0
k141_657017_flag=0_multi=17.9442_len=13555	Autographiviridae	Lytic	3.58698	0	19.4356	113.641	141.618	362.681	477.727	979.27	395.638	0	0	6.6358	176.567	726.823	827.287	894.233	555.299	244.661	0	0
k141_572823_flag=1_multi=13.0000_len=22661	unknown	Lytic	62.2226	143.933	360.395	363.362	313.099	427.211	373.685	332.06	320.223	21.5443	80.7316	182.588	413.034	658.726	853.275	1938.27	1176.83	918.797	0.356619	0
k141_610372_flag=1_multi=13.1365_len=11390	Kyanoviridae	Lytic	2.1344	5.84413	50.8857	167.208	219.759	471.461	1200.89	1744.31	1273.5	4.76261	0	7.89713	300.184	1153.3	1996.68	2701.58	2435.6	2120.26	0	0.0713936
k141_474258_flag=0_multi=15.9135_len=40230	Autographiviridae	Lytic	3.62577	1.6546	13.0971	135.059	161.394	388.223	605.372	1260.6	522.936	0	4.43658	23.4764	253.904	843.299	958.671	1112.2	722.066	362.592	0.0803514	0.0404262
k141_4215_flag=1_multi=11.0000_len=14873	unknown	Lytic	0	0	0	60.2591	43.0229	188.154	66.0782	182.72	478.273	0	0	0	0	0	21.1395	215.619	1240.71	39.3987	0	0
k141_522508_flag=1_multi=14.0000_len=44118	unknown	Lytic	0	0	0	0	0	0	1.52577	1.47247	1.26247	0	0	42.815	0	0	0.593877	3.46139	1609.43	1.13039	0	0
k141_40437_flag=0_multi=17.9931_len=54309	Autographiviridae	Lytic	4.02874	4.90266	5.82111	152.648	182.971	366.265	537.182	1143.53	559.812	1.49826	6.5729	20.7029	225.069	792.098	921.454	1122.64	779.641	369.604	0	0
k141_2604_flag=0_multi=12.5357_len=11439	unknown	Lytic	0	0	9.21231	39.1744	52.6479	94.2189	132.992	299.096	779.749	0	0	0	0	26.0991	91.6187	482.266	982.817	1985.83	0	0
k141_263057_flag=0_multi=29.9171_len=67287	unknown	Lytic	0	4.94632	10.9629	39.1262	13.9849	91.3279	172.469	119.234	855.194	0	0	8.02071	2.54068	28.6384	100.072	415.323	787.556	2871.99	0	0
k141_9497_flag=1_multi=9.0000_len=14737	unknown	Temperate	0	4.51684	17.8767	112.128	97.0563	141.135	262.184	301.222	402.779	0	0	12.2071	58.0019	250.467	609.813	968.878	737.661	780.017	0	0
k141_356077_flag=0_multi=12.9734_len=10062	Kyanoviridae	Lytic	16.9127	29.7695	10.473	359.068	317.968	415.297	1319.25	2115.49	1491.4	2.69559	17.7384	0	293.08	1087.03	2330.51	3340.81	2789.87	2008.54	0.963785	0.484897
k141_446749_flag=0_multi=6.1155_len=13794	unknown	Lytic	0	4.82562	15.2791	168.523	158.266	204.243	460.666	568.277	851.976	0	0	13.0417	80.5572	448.607	1219.43	1608.02	1123.28	1086.42	0	0
k141_448881_flag=1_multi=10.6807_len=14285	unknown	Lytic	10.211	4.65975	14.7539	133.321	234.509	211.783	540.961	558.597	899.559	0	0	6.29669	77.7883	503.486	1445.3	1639.61	1233.98	1372.87	0	0
k141_49120_flag=1_multi=10.8197_len=25214	unknown	Lytic	1.92836	9.23995	0	18.8833	35.0813	86.2397	126.544	229.304	301.685	0	0	7.13479	37.2908	455.324	549.7	498.908	894.491	1067.56	0	0

## Sheet: S7
Virus	Taxonomy	Lifestyle	Host taxonomy							CES1	CES2	CES3	CES4	CES5	CES6	CES7	CES8	CES9	CWS1	CWS2	CWS3	CWS4	CWS5	CWS6	CWS7	CWS8	CWS9	CEW	CWW
			domain	phylum	class	order	family	genus	species
k141_122951_flag=1_multi=15.9777_len=39219	Straboviridae	Lytic	d__Bacteria	p__Proteobacteria	c__Alphaproteobacteria	o__Rhodobacterales	f__Rhodobacteraceae	g__CACKLF01	s__CACKLF01 sp902600895	66.9463	71.2847	59.113	3.57063	0.959738	0.964239	2.05963	0.552134	2.43457	79.5316	23.8925	0	32.6923	4.15218	6.6806	0.973442	0	0	71.9138	77.7323
k141_123677_flag=1_multi=9.0000_len=11483	unknown	Lytic	d__Archaea	p__Thermoproteota	c__Nitrososphaeria	o__	f__	g__	s__	0	11.5936	18.354	131.707	155.7	212.415	372.826	396.952	532.161	0	0	7.83317	119.101	380.533	600.084	1208.52	865.208	906.595	0	0
k141_144467_flag=0_multi=9.5382_len=10802	unknown	Lytic	d__Bacteria	p__Bacteroidota	c__Bacteroidia	o__Sphingobacteriales	f__Sphingobacteriaceae	g__Mucilaginibacter	s__Mucilaginibacter sp900110415	54.014	40.0546	78.0445	116.675	15.6804	47.2618	11.2169	2.00464	3.68301	75.3279	41.308	104.088	87.0442	12.5628	4.85107	0	1.2739	2.30838	26.1099	109.607
k141_145925_flag=1_multi=11.8300_len=18501	Demerecviridae	Lytic	d__Bacteria	p__Proteobacteria	c__Gammaproteobacteria	o__Burkholderiales	f__Burkholderiaceae	g__Polynucleobacter	s__Polynucleobacter sp009927445	177.393	71.9578	74.0465	27.2489	27.4655	0	2.91071	1.17043	1.72029	187.652	69.9426	31.6017	46.2015	42.5426	12.7456	0	1.48756	0	60.978	72.7421
k141_159044_flag=1_multi=32.4408_len=15419	unknown	Temperate	d__Bacteria	p__Verrucomicrobiota	c__Verrucomicrobiae	o__Chthoniobacterales	f__UBA6821	g__UBA6821	s__UBA6821 sp009928265	25.2268	0	3.4172	0	0	0	0	0	0	7.03627	2.89389	0	11.0873	5.28064	0	0	0	0	251.471	30.2191
k141_166609_flag=1_multi=16.7084_len=49908	unknown	Lytic	d__Archaea	p__Thermoproteota	c__Nitrososphaeria	o__	f__	g__	s__	4.87112	8.66935	23.2263	167.231	236.061	428.493	469.907	784.024	1010.14	4.34769	7.15251	44.1559	293.728	1106.66	969.111	1191.42	1016.86	843.863	0	0.228108
k141_186166_flag=1_multi=29.0000_len=36805	Mesyanzhinovviridae	Lytic	d__Bacteria	p__Proteobacteria	c__Gammaproteobacteria	o__Burkholderiales	f__Nitrosomonadaceae	g__Nitrosomonas	s__Nitrosomonas sp002083595	31.7054	23.5115	2.86319	0	0	0	0	0	0	25.7929	6.0618	0	8.12854	0	0	0	0	0	158.179	95.7779
k141_199323_flag=1_multi=8.8362_len=10167	unknown	Lytic	d__Bacteria	p__Bacteroidota	c__Bacteroidia	o__Flavobacteriales	f__Flavobacteriaceae	g__Tenacibaculum	s__Tenacibaculum aiptasiae	0	3.27356	10.3649	0	1.85109	14.8781	0	0	7.04347	5.33551	8.7776	0	21.0183	13.3475	5.15406	0	1.35346	0	5.48453	65.185
k141_199780_flag=0_multi=14.9911_len=34886	unknown	Temperate	d__Bacteria	p__Actinobacteriota	c__Actinomycetia	o__Mycobacteriales	f__Mycobacteriaceae	g__Mycobacterium	s__Mycobacterium marinum	0	1.90806	0	0	0	0	0	0	0	7.77477	3.83715	7.73505	0	0	1.50207	0	0.788892	0	47.882	105.825
k141_201848_flag=0_multi=7.1948_len=15215	unknown	Lytic	d__Bacteria	p__Firmicutes_A	c__Clostridia	o__Lachnospirales	f__Lachnospiraceae	g__Butyrivibrio	s__Butyrivibrio sp000621605	27.1629	41.5619	114.28	49.7007	8.65855	23.612	7.96351	12.8089	12.028	30.3051	58.6539	82.7654	50.5617	46.3792	18.9423	15.0552	19.8971	15.5691	79.2465	80.6492
k141_225614_flag=1_multi=12.0000_len=30625	unknown	Lytic	d__Bacteria	p__Patescibacteria	c__Saccharimonadia	o__Saccharimonadales	f__CAIOMD01	g__CAIOMD01	s__CAIOMD01 sp903880655	39.6911	28.256	17.2048	0	0	1.23482	0	0	0.519626	30.9978	0	0	0	0	0	0	0	2.44263	77.9503	40.3865
k141_238163_flag=0_multi=6.0000_len=10145	unknown	Lytic	d__Bacteria	p__Bacteroidota	c__Bacteroidia	o__Sphingobacteriales	f__Sphingobacteriaceae	g__Sphingobacterium	s__Sphingobacterium cavernae	76.6826	72.1745	15.581	0	3.7102	0	0	0	3.13722	48.1237	0	26.5988	0	2.67528	2.58262	1.88159	0	0	45.1663	45.7685
k141_238235_flag=1_multi=7.0000_len=13690	Kyanoviridae	Lytic	d__Bacteria	p__Proteobacteria	c__Gammaproteobacteria	o__LLD-282	f__LLD-282	g__LLD-282	s__LLD-282 sp009927065	158.047	158.024	96.2195	642.388	75.6099	71.8209	32.4522	78.2966	79.6259	93.1179	221.638	65.7036	87.413	33.7029	86.1234	79.4782	76.3922	46.4461	56.4336	42.9455
k141_241325_flag=0_multi=8.4630_len=11693	unknown	Lytic	d__Bacteria	p__Proteobacteria	c__Gammaproteobacteria	o__Burkholderiales	f__Burkholderiaceae	g__Polynucleobacter	s__Polynucleobacter necessarius_J	74.8472	5.69269	171.232	14.3713	8.04754	27.49	40.2973	3.70378	4.08284	6.95879	49.6085	23.0775	0	2.32111	0	6.52996	4.70731	4.26497	83.1425	61.6156
k141_246525_flag=0_multi=33.4894_len=37255	Kyanoviridae	Lytic	d__Bacteria	p__Cyanobacteria	c__Vampirovibrionia	o__Caenarcaniphilales	f__LMEP-6097	g__LMEP-6097	s__LMEP-6097 sp009924885	370.649	283.197	161.23	34.5815	21.217	27.9145	87.8124	79.3395	86.0712	165.265	80.247	25.3511	25.2383	88.15	185.666	138.343	140.728	84.3331	286.659	249.681
k141_257_flag=1_multi=6.7184_len=11984	unknown	Lytic	d__Bacteria	p__Proteobacteria	c__Gammaproteobacteria	o__Burkholderiales	f__Burkholderiaceae	g__Rhodoferax	s__Rhodoferax sp007280205	111.573	58.3218	17.5867	35.0558	61.2466	52.0671	20.2211	20.7796	21.2464	31.6858	7.44675	71.3041	78.4589	83.7956	41.5397	9.5571	17.2238	8.32282	50.1037	25.717
k141_266540_flag=1_multi=10.4045_len=14203	unknown	Lytic	d__Bacteria	p__Bacteroidota	c__Bacteroidia	o__Bacteroidales	f__Paludibacteraceae	g__Paludibacter	s__Paludibacter sp010365115	22.2517	44.5232	74.1953	69.0175	25.1764	38.6073	20.8534	15.2462	13.4452	47.7418	9.42497	66.497	6.01826	38.2183	47.9629	6.71996	23.2525	10.5338	78.0083	90.2889
k141_26689_flag=1_multi=11.0000_len=26974	Casjensviridae	Lytic	d__Bacteria	p__Proteobacteria	c__Gammaproteobacteria	o__Burkholderiales	f__Burkholderiaceae	g__Hydrogenophaga	s__Hydrogenophaga sp013823485	39.6558	2.46773	23.4403	1.03831	4.88396	2.80392	0.499101	0	2.35984	61.3371	18.1964	13.3385	20.5977	8.04945	0	0	1.02029	0	28.6115	72.2613
k141_268337_flag=0_multi=8.9811_len=10278	unknown	Lytic	d__Bacteria	p__Nitrospirota	c__Nitrospiria	o__Nitrospirales	f__Nitrospiraceae	g__Nitrospira_D	s__	858.612	459.825	240.944	136.249	38.453	11.0381	2.61972	3.16027	13.1607	226.949	78.1453	100.643	116.432	60.7352	43.3363	26.0013	8.03307	7.27822	65.9685	17.0894
k141_277201_flag=0_multi=8.9845_len=11467	Kyanoviridae	Lytic	d__Bacteria	p__Bdellovibrionota_C	c__UBA2361	o__UBA2361	f__RFPC01	g__RFPC01	s__RFPC01 sp009926305	175.965	296.049	326.238	461.618	262.597	427.072	393.305	214.332	168.614	52.0369	202.345	109.817	108.086	227.218	363.295	292.981	278.405	182.659	94.9999	51.5546
k141_293008_flag=1_multi=12.9359_len=22219	Demerecviridae	Lytic	d__Bacteria	p__Bacteroidota	c__Bacteroidia	o__Flavobacteriales	f__Flavobacteriaceae	g__Flavobacterium	s__Flavobacterium faecale	19.6946	2.99584	0	7.56306	5.08213	0	0	0	0	65.9186	8.03294	20.2413	3.84704	4.88604	0	2.57735	0	0	41.245	99.1076
k141_294125_flag=1_multi=10.6654_len=10374	unknown	Lytic	d__Bacteria	p__Proteobacteria	c__Gammaproteobacteria	o__Burkholderiales	f__Burkholderiaceae	g__Polynucleobacter	s__Polynucleobacter hirudinilacicola	35.1515	0	0	10.799	48.982	67.4383	81.7576	102.28	57.5244	5.22905	17.2049	8.67055	37.0781	54.9407	60.6146	29.4408	78.2609	26.4398	44.2471	74.4664
k141_30304_flag=0_multi=18.4617_len=13657	Kyanoviridae	Lytic	d__Bacteria	p__Actinobacteriota	c__Actinomycetia	o__Nanopelagicales	f__AcAMD-5	g__ATZT02	s__	21.3612	56.0513	57.8712	47.1676	2.75609	22.1521	2.95733	6.34229	3.49569	3.97204	26.1381	88.9142	31.2944	5.96194	11.5109	16.7727	0	7.30326	198.054	166.719
k141_315645_flag=1_multi=11.0000_len=28692	unknown	Lytic	d__Bacteria	p__Cyanobacteria	c__Cyanobacteriia	o__Cyanobacteriales	f__Nostocaceae	g__Dolichospermum	s__Dolichospermum planctonicum	0	0	0	0	0	0	0	0	0	0	0	0	0	0	0	0	0	0	41.8826	60.5373
k141_349152_flag=1_multi=14.9448_len=27540	unknown	Lytic	d__Bacteria	p__Bacteroidota	c__Bacteroidia	o__Flavobacteriales	f__Flavobacteriaceae	g__Flavobacterium	s__Flavobacterium sp000812945	49.4337	25.3787	11.4793	0	0	0.686574	0	0.78628	2.31134	53.1825	3.24045	9.79829	21.7263	0	5.7082	0	0.49966	0.905416	71.5994	42.4007
k141_351213_flag=1_multi=11.0000_len=11486	unknown	Lytic	d__Bacteria	p__Cyanobacteria	c__Cyanobacteriia	o__Cyanobacteriales	f__Nostocaceae	g__Dolichospermum	s__Dolichospermum sp000312705	8.46623	0	0	0	0	0	0	0	0	0	0	15.6622	0	0	0	0	0	0	37.712	66.0535
k141_368470_flag=1_multi=7.0000_len=14542	Kyanoviridae	Lytic	d__Bacteria	p__Proteobacteria	c__Gammaproteobacteria	o__UBA7916	f__UBA7916	g__UBA7916	s__UBA7916 sp002722435	50.1529	0	79.7123	3.85192	2.58836	5.201	0	0	3.28295	7.46061	49.0947	6.18541	11.7559	0	0	2.62532	0	0	58.4622	64.6982
k141_383255_flag=0_multi=18.9827_len=22971	Autographiviridae	Lytic	d__Bacteria	p__Proteobacteria	c__Gammaproteobacteria	o__Burkholderiales	f__Gallionellaceae	g__Nitrotoga	s__Nitrotoga sp003402375	6.34995	2.89777	0	0	0	0	1.17215	11.3121	3.81022	4.72301	0	0	0	4.72609	15.9684	15.7888	5.99044	1.62826	125.56	49.7016
k141_38820_flag=1_multi=10.9499_len=14962	Straboviridae	Lytic	d__Bacteria	p__Bacteroidota	c__Bacteroidia	o__Flavobacteriales	f__Flavobacteriaceae	g__Flaviramulus_A	s__Flaviramulus_A sp002741945	42.2457	48.938	24.651	3.74379	3.77356	6.31875	25.1943	15.1964	22.3356	29.0047	8.94685	6.01178	11.4259	0	45.5298	28.0679	34.9488	8.33283	110.671	75.6541
k141_398112_flag=1_multi=11.8598_len=15729	Guelinviridae	Lytic	d__Bacteria	p__Bacteroidota	c__Bacteroidia	o__Chitinophagales	f__Chitinophagaceae	g__Sediminibacterium	s__Sediminibacterium sp009928005	103.555	103.683	123.945	33.8317	4.78606	0	2.56776	2.75341	4.5528	125.881	82.2689	45.749	144.011	22.4318	3.33151	20.6312	17.4972	4.7559	83.1305	55.5247
k141_43217_flag=0_multi=22.0000_len=12649	unknown	Lytic	d__Bacteria	p__Bacteroidota	c__Bacteroidia	o__AKYH767	f__B-17BO	g__UBA4416	s__UBA4416 sp005800865	71.1123	31.5746	70.814	55.3547	31.2451	28.402	25.544	35.9505	25.1618	92.2043	67.0249	60.4443	101.365	49.3507	26.9277	28.6731	31.5486	13.7992	234.856	136.354
k141_461465_flag=0_multi=8.9358_len=12623	unknown	Lytic	d__Bacteria	p__Verrucomicrobiota	c__Verrucomicrobiae	o__Pedosphaerales	f__UBA9464	g__SXXZ01	s__SXXZ01 sp903939515	59.7033	73.8259	50.0893	184.156	111.82	145.298	69.3242	70.3336	48.5362	45.1227	98.977	142.515	169.289	187.059	107.933	72.5864	74.1285	70.1258	108.899	60.0394
k141_463058_flag=0_multi=9.9894_len=18881	unknown	Lytic	d__Bacteria	p__Actinobacteriota	c__Actinomycetia	o__Mycobacteriales	f__Mycobacteriaceae	g__Mycobacterium	s__Mycobacterium sp001667275	51.5032	35.2548	27.9063	0	5.98061	0	0	0	0	17.2383	23.6327	9.52792	0	0	2.77535	0	0	0	66.1282	17.5288
k141_475765_flag=1_multi=11.0000_len=11432	Kyanoviridae	Lytic	d__Bacteria	p__Actinobacteriota	c__Actinomycetia	o__Nanopelagicales	f__Nanopelagicaceae	g__Planktophila	s__Planktophila sp009726135	53.1639	49.4926	13.8269	100.446	74.0815	150.512	208.442	84.2906	48.0246	35.5883	42.9348	27.5384	48.6007	125.827	128.345	153.618	93.8882	89.4281	86.8786	44.8127
k141_506753_flag=0_multi=13.9431_len=10186	unknown	Lytic	d__Bacteria	p__Bacteroidota	c__Bacteroidia	o__Bacteroidales	f__Paludibacteraceae	g__UBA1181	s__UBA1181 sp902766045	7.16006	42.4769	5.17277	21.9967	0	0	0	0	4.68689	18.6394	43.8062	22.0764	25.175	0	0	0	0	0	33.2425	114.4
k141_519592_flag=1_multi=10.9403_len=18219	unknown	Lytic	d__Bacteria	p__Bacteroidota	c__Bacteroidia	o__AKYH767	f__B-17BO	g__UBA4416	s__UBA4416 sp903893815	21.3498	12.7875	86.7608	52.2667	22.7257	59.1564	34.7302	10.1027	7.42441	32.7519	161.643	204.888	159.517	56.6084	38.8286	15.716	33.9881	12.3177	69.5069	65.6108
k141_527188_flag=0_multi=12.9739_len=10270	unknown	Lytic	d__Bacteria	p__Dependentiae	c__Babeliae	o__Babeliales	f__RVW-14	g__CAIKAH01	s__CAIKAH01 sp010027825	61.5463	38.8888	20.5218	8.18129	12.8276	20.2523	2.62176	2.10849	3.09904	89.7939	0	13.1375	12.4845	10.5709	0	1.85869	8.03933	2.42796	124.25	81.3965
k141_548557_flag=1_multi=8.0000_len=17034	Zierdtviridae	Lytic	d__Bacteria	p__Actinobacteriota	c__Actinomycetia	o__Actinomycetales	f__Microbacteriaceae	g__Aquiluna	s__Aquiluna sp009704945	19.9807	19.5387	0	0	2.2097	7.7702	0	0	0	15.9229	0	0	0	6.37331	0	0	0	0	54.796	21.0526
k141_558578_flag=1_multi=11.0000_len=11243	unknown	Temperate	d__Bacteria	p__Firmicutes_A	c__Clostridia	o__Lachnospirales	f__Lachnospiraceae	g__Herbinix	s__Herbinix sp012518935	0	0	0	0	0	0	0	0	0	7.23732	0	0	30.4109	0	0	0	0	0	0	67.4088
k141_559314_flag=1_multi=9.8384_len=11207	unknown	Lytic	d__Bacteria	p__Proteobacteria	c__Gammaproteobacteria	o__SAR86	f__D2472	g__SAR86A	s__SAR86A sp902517425	41.2158	8.90933	28.2091	4.99818	0	0	0	0	0	36.3028	15.9261	0	3.81357	14.5306	14.0273	0	0	0	78.3833	59.281
k141_572823_flag=1_multi=13.0000_len=22661	unknown	Lytic	d__Bacteria	p__Bacteroidota	c__Bacteroidia	o__Flavobacteriales	f__BACL11	g__GCA-002697625	s__GCA-002697625 sp002696275	62.2226	143.933	360.395	363.362	313.099	427.211	373.685	332.06	320.223	21.5443	80.7316	182.588	413.034	658.726	853.275	1938.27	1176.83	918.797	0.356619	0
k141_585506_flag=0_multi=26.0131_len=12638	Straboviridae	Lytic	d__Bacteria	p__Bacteroidota	c__Bacteroidia	o__Flavobacteriales	f__Flavobacteriaceae	g__Flavobacterium	s__Flavobacterium xinjiangense	30.778	23.7016	4.16916	0	13.4024	2.99228	2.13052	0	0	8.5846	7.06139	14.2346	6.76352	4.2951	0	3.02084	2.17766	1.97303	125.587	63.507
k141_608307_flag=0_multi=22.9953_len=207466	Kyanoviridae	Lytic	d__Bacteria	p__Dependentiae	c__Babeliae	o__Babeliales	f__RVW-14	g__CAIKAH01	s__CAIKAH01 sp010027825	27.8888	18.6091	2.28572	1.48497	3.71926	0.364556	0.45424	0.208749	0.958805	24.0552	7.52766	2.38456	7.00411	1.04656	1.38918	0.368035	0.265309	0	151.167	55.0344
k141_61277_flag=0_multi=5.9681_len=10302	Drexlerviridae	Lytic	d__Bacteria	p__Proteobacteria	c__Gammaproteobacteria	o__Burkholderiales	f__Burkholderiaceae	g__UBA3064	s__UBA3064 sp005787245	47.1962	19.384	46.0307	10.8745	10.961	11.0124	7.84086	2.10194	0	13.164	43.3129	43.6557	33.1887	5.26902	12.7163	7.41165	2.67145	2.42042	63.0693	46.4918
k141_629925_flag=0_multi=12.9878_len=21836	unknown	Lytic	d__Bacteria	p__Actinobacteriota	c__Actinomycetia	o__Mycobacteriales	f__Mycobacteriaceae	g__Mycobacterium	s__Mycobacterium sp001668615	91.2935	36.5807	36.1947	17.9567	0	3.46368	0	2.97502	2.9151	134.15	12.2607	20.5963	35.2306	4.97174	11.9988	0	0	0	58.5116	69.043
k141_636920_flag=1_multi=11.0000_len=21070	unknown	Lytic	d__Bacteria	p__Cyanobacteria	c__Cyanobacteriia	o__Cyanobacteriales	f__Nostocaceae	g__Dolichospermum	s__Dolichospermum circinale	0	0	0	0	0	0	0	0	0	0	0	0	0	0	0	0	0	0	47.2146	72.5565
k141_642708_flag=1_multi=9.0000_len=10347	unknown	Lytic	d__Bacteria	p__Verrucomicrobiota	c__Verrucomicrobiae	o__Pedosphaerales	f__UBA9464	g__SXXZ01	s__SXXZ01 sp903939515	0	9.64984	5.09228	46.0156	21.8266	32.8934	18.2158	29.2991	16.1489	10.4854	21.5623	17.3863	24.7832	36.7227	25.322	66.4147	58.5163	12.0495	57.0934	37.8805
k141_645282_flag=0_multi=19.9660_len=11456	unknown	Lytic	d__Bacteria	p__Actinobacteriota	c__Actinomycetia	o__Nanopelagicales	f__Nanopelagicaceae	g__Nanopelagicus	s__	25.4652	92.9673	266.761	97.7908	29.5705	11.5536	11.7517	17.9569	20.142	99.4386	132.429	204.142	205.188	104.242	52.6026	13.3301	18.0176	11.9713	140.662	185.477
k141_646846_flag=1_multi=15.9567_len=12971	unknown	Lytic	d__Bacteria	p__Proteobacteria	c__Gammaproteobacteria	o__Burkholderiales	f__Burkholderiaceae	g__Variovorax	s__Variovorax ginsengisoli	71.2212	41.0544	32.497	23.7515	0	7.28866	0	0	0	10.4553	27.5204	13.8691	13.1798	10.4621	4.03988	2.94329	0	0	65.2937	99.1781
k141_664441_flag=1_multi=16.4492_len=82748	Kyanoviridae	Lytic	d__Archaea	p__Methanobacteriota	c__Methanobacteria	o__Methanobacteriales	f__Methanobacteriaceae	g__Methanobrevibacter_C	s__Methanobrevibacter_C sp009776495	45.2441	72.3983	68.1323	138.771	196.733	337.5	2235.6	427.467	96.926	48.5113	40.4429	49.4592	40.2864	56.0867	257.105	194.237	149.334	95.5243	8.75052	14.5932
k141_666716_flag=0_multi=10.6628_len=20384	Kyanoviridae	Lytic	d__Bacteria	p__Actinobacteriota	c__Actinomycetia	o__Nanopelagicales	f__AcAMD-5	g__ATZT02	s__	91.8333	124.09	95.6399	162.13	156.956	224.48	67.3666	48.3352	55.4289	139.714	238.603	260.349	364.822	147.793	39.846	63.679	105.311	78.2894	95.9025	51.9802
k141_673099_flag=1_multi=9.0000_len=11715	unknown	Lytic	d__Bacteria	p__Cyanobacteria	c__Cyanobacteriia	o__Cyanobacteriales	f__Nostocaceae	g__Dolichospermum	s__Dolichospermum sp000312705	0	0	0	0	0	0	0	0	0	0	0	0	0	0	0	0	0	0	40.7688	40.4678
k141_709412_flag=0_multi=11.4719_len=13081	unknown	Lytic	d__Bacteria	p__Patescibacteria	c__Saccharimonadia	o__Saccharimonadales	f__SZUA-47	g__RFTN01	s__RFTN01 sp009923445	117.084	137.393	177.23	181.991	103.588	141.656	15.4378	17.3816	12.7737	99.5266	112.567	65.3244	16.3362	97.5165	44.065	29.1854	28.4028	30.4994	97.6111	36.1797
k141_717944_flag=0_multi=92.6327_len=16158	unknown	Lytic	d__Bacteria	p__Proteobacteria	c__Alphaproteobacteria	o__Pelagibacterales	f__Pelagibacteraceae	g__Fonsibacter	s__Fonsibacter ubiquis	3.00913	4.11961	0	0	5.82374	8.19146	0.833194	0	5.90923	67.1446	24.8539	8.35019	5.2901	0	3.24306	1.18138	3.40652	0	699.652	182.232
k141_82799_flag=1_multi=12.0000_len=15383	Kyanoviridae	Lytic	d__Bacteria	p__Bacteroidota	c__Bacteroidia	o__Chitinophagales	f__Chitinophagaceae	g__Sediminibacterium	s__Sediminibacterium sp012270485	91.6613	112.506	54.8032	120.164	90.5336	108.166	96.2688	67.5681	56.8969	28.2109	84.1193	55.5489	61.1228	63.516	127.742	28.5406	74.2465	70.5116	90.4639	48.4742
k141_86163_flag=1_multi=9.0000_len=11842	unknown	Lytic	d__Bacteria	p__Firmicutes	c__Bacilli	o__Lactobacillales	f__Streptococcaceae	g__Streptococcus	s__Streptococcus suis_I	28.741	14.0527	26.6964	42.5714	0	0	2.27373	1.82859	1.34382	96.1973	41.4483	37.9785	14.4363	0	0	0	0	0	36.6465	58.7116
k141_893903_flag=1_multi=6.7786_len=14236	unknown	Lytic	d__Archaea	p__Thermoproteota	c__Bathyarchaeia	o__RBG-16-48-13	f__RBG-16-48-13	g__RBG-16-48-13	s__RBG-16-48-13 sp001775995	17.077	16.3653	77.7245	324.614	363.55	401.116	839.767	592.462	640.522	11.4315	34.4781	66.3429	249.179	556.694	1516.53	1410.6	659.227	506.2	0	0
k141_91162_flag=1_multi=9.6125_len=12519	Demerecviridae	Lytic	d__Bacteria	p__Verrucomicrobiota	c__Verrucomicrobiae	o__Methylacidiphilales	f__UBA3015	g__UBA3015	s__UBA3015 sp010025475	0	5.31709	0	0	0	1.51036	0	0	0	4.3331	0	0	0	0	0	0	0	0	19.9467	71.7104
k141_91182_flag=0_multi=17.9685_len=14978	unknown	Lytic	d__Bacteria	p__Firmicutes	c__Bacilli	o__Paenibacillales	f__Paenibacillaceae	g__Paenibacillus_C	s__Paenibacillus_C sp001956295	6.4924	2.22208	21.1069	41.1377	3.76953	12.624	10.786	0	0	7.24344	0	12.0107	59.9221	21.7445	12.2449	0	1.83745	1.66479	93.3956	99.0271
k141_9497_flag=1_multi=9.0000_len=14737	unknown	Temperate	d__Archaea	p__Thermoproteota	c__Nitrososphaeria	o__	f__	g__	s__	0	4.51684	17.8767	112.128	97.0563	141.135	262.184	301.222	402.779	0	0	12.2071	58.0019	250.467	609.813	968.878	737.661	780.017	0	0
k141_95816_flag=0_multi=11.1762_len=10037	unknown	Lytic	d__Bacteria	p__Proteobacteria	c__Gammaproteobacteria	o__Burkholderiales	f__Burkholderiaceae	g__Polynucleobacter	s__Polynucleobacter sp009927445	9.68847	6.63192	0	11.1616	20.6257	24.4901	4.02394	7.55102	1.58549	0	8.89129	0	34.0649	21.6325	0	19.0183	5.48397	0	24.7182	113.262

## Sheet: S8
AMG classification	KOa	gene_description	KEGG pathway1	KEGG pathway2	KEGG pathway3	CES1	CES2	CES3	CES4	CES5	CES6	CES7	CES8	CES9	CWS1	CWS2	CWS3	CWS4	CWS5	CWS6	CWS7	CWS8	CWS9	CEW	CWW
Class I AMG	K09882	cobS; cobaltochelatase CobS [EC:6.6.1.2]	Metabolism	Metabolism of cofactors and vitamins	Porphyrin and chlorophyll metabolism	615.504	912.828	786.106	663.514	1022.29	1022.29	2797.53	818.214	342.44	727.17	668.26	494.267	612.269	591.785	886.207	904.39	624.998	429.282	911.449	924.372
Class I AMG	K00390	cysH; phosphoadenosine phosphosulfate reductase [EC:1.8.4.8 1.8.4.10]	Metabolism	Energy metabolism	Sulfur metabolism	97.7296	336.02	1130.21	284.482	4.64191	4.64191	1.65253	10.9643	10.2552	181.447	1545.92	3817.43	5322.17	1959.74	156.784	84.3518	70.9421	23.3382	0.867974	1.19779
Class I AMG	K01711	gmd/GMDS; GDPmannose 4,6-dehydratase [EC:4.2.1.47]	Metabolism	Carbohydrate metabolism	Fructose and mannose metabolism	797.714	830.062	691.319	665.009	617.582	617.582	2493.35	608.893	282.681	513.715	407.302	337.055	302.494	318.689	562.514	488.797	446.435	304.623	873.057	728.05
Class I AMG	K01710	E4.2.1.46/rfbB/rffG; dTDP-glucose 4,6-dehydratase [EC:4.2.1.46]	Metabolism	Metabolism of terpenoids and polyketides	Polyketide sugar unit biosynthesis	327.753	376.357	334.85	405.337	744.408	744.408	4483.79	872.041	223.425	391.787	404.552	288.42	374.764	226.496	562.171	445.43	360.858	216.6	456.986	415.836
Class II AMG	K07260	vanY; zinc D-Ala-D-Ala carboxypeptidase [EC:3.4.17.14]	Metabolism	Glycan biosynthesis and metabolism	Peptidoglycan biosynthesis	2068.28	2197.79	1297.38	170.736	34.798	34.798	9.87415	17.5843	69.192	2674.98	1203.65	642.155	845.505	126.747	67.9853	40.932	21.6014	5.89331	193.411	212.697
Class I AMG	K10026	queE; 7-carboxy-7-deazaguanine synthase [EC:4.3.99.3]	Metabolism	Metabolism of cofactors and vitamins	Folate biosynthesis	251.829	619.528	903.852	173.641	10.7363	10.7363	4.69362	13.6433	14.603	189.47	3604.87	4095.61	810.251	116.724	58.8566	48.1101	68.6073	15.3706	62.5822	171.738
Class I AMG	K01495	GCH1/folE; GTP cyclohydrolase IA [EC:3.5.4.16]	Metabolism	Metabolism of cofactors and vitamins	Folate biosynthesis	251.829	619.528	903.852	173.641	10.7363	10.7363	4.69362	13.6433	14.603	189.47	3604.87	4095.61	810.251	116.724	58.8566	48.1101	68.6073	15.3706	62.5822	171.738
Class I AMG	K23144	K23144; UDP-N-acetylglucosamine diphosphorylase / glucose-1-phosphate thymidylyltransferase / UDP-N-acetylgalactosamine diphosphorylase / glucosamine-1-phosphate N-acetyltransferase / galactosamine-1-phosphate N-acetyltransferase [EC:2.7.7.23 2.7.7.24 2.7.7.83 2.3.1.157 2.3.1.276]	Metabolism	Metabolism of terpenoids and polyketides	Polyketide sugar unit biosynthesis	207.471	464.049	416.721	1440.15	1256.65	1256.65	238.14	156.395	133.154	457.422	410.713	481.138	664.444	492.162	258.495	191.752	213.174	147.181	347.26	597.823
Class I AMG	K01784	galE/GALE; UDP-glucose 4-epimerase [EC:5.1.3.2]	Metabolism	Carbohydrate metabolism	Galactose metabolism	447.526	476.529	742.488	382.471	602.675	602.675	439.228	456.787	294.899	382.748	353.383	557.994	408.223	339.632	360.528	375.392	559.073	314.982	814.488	848.393
Class I AMG	K18062	cmcI; cephamycin C biosynthesis protein	Metabolism	Biosynthesis of other secondary metabolites	Penicillin and cephalosporin biosynthesis	4.87112	8.66935	23.2263	167.231	428.493	428.493	469.907	784.024	1010.14	4.34769	7.15251	44.1559	293.728	1106.66	969.111	1191.42	1016.86	843.863	0	0.228108
Class I AMG	K03271	gmhA/lpcA; D-sedoheptulose 7-phosphate isomerase [EC:5.3.1.28]	Metabolism	Glycan biosynthesis and metabolism	Lipopolysaccharide biosynthesis	56.1926	287.204	560.228	1789.97	1537.69	1537.69	47.1959	24.1918	9.8088	8.35906	89.3863	228.7	632.239	476.777	37.3459	4.41221	5.30112	3.84239	0.0622647	0
Class I AMG	K02377	TSTA3/fcl; GDP-L-fucose synthase [EC:1.1.1.271]	Metabolism	Carbohydrate metabolism	Fructose and mannose metabolism	144.201	249.03	168.582	310.497	534.299	534.299	2420.81	549.082	205.159	104.412	141.603	112.026	106.35	167.961	447.454	345.703	331.552	216.294	87.7817	61.5618
Class I AMG	K22316	rhnA-cobC; ribonuclease H / adenosylcobalamin/alpha-ribazole phosphatase [EC:3.1.26.4 3.1.3.73]	Metabolism	Metabolism of cofactors and vitamins	Porphyrin and chlorophyll metabolism	126.797	131.361	103.818	110.981	252.308	252.308	411.657	754.887	892.017	129.413	38.3181	6.52057	60.72	77.6836	359.192	567.017	1141.2	1544.77	124.537	136.744
Class I AMG	K12452	ascC/ddhC/rfbH; CDP-4-dehydro-6-deoxyglucose reductase, E1 [EC:1.17.1.1]	Metabolism	Carbohydrate metabolism	Amino sugar and nucleotide sugar metabolism	178.479	294.622	123.676	146.516	351.405	351.405	2238.91	430.922	103.004	395.33	111.567	138.157	106.795	78.5007	263.248	208.593	157.634	99.8151	274.584	325.732
Class I AMG	K01955	carB/CPA2; carbamoyl-phosphate synthase large subunit [EC:6.3.5.5]	Metabolism	Amino acid metabolism	Alanine, aspartate and glutamate metabolism	0.577378	0	10.6367	99.1102	250.58	250.58	408.146	753.168	888.832	1.28834	0	1.06813	14.2105	67.6818	352.511	565.786	1140.09	1544.77	0	0.0579382
Class I AMG	K13010	per/rfbE; perosamine synthetase [EC:2.6.1.102]	Metabolism	Carbohydrate metabolism	Amino sugar and nucleotide sugar metabolism	0.577378	0	10.6367	99.1102	250.58	250.58	408.146	753.168	888.832	1.28834	0	1.06813	14.2105	67.6818	352.511	565.786	1140.09	1544.77	0	0.0579382
Class I AMG	K02703	psbA; photosystem II P680 reaction center D1 protein [EC:1.10.3.9]	Metabolism	Energy metabolism	Photosynthesis	335.109	253.957	232.377	164.962	343.394	343.394	2235.6	428.311	100.646	249.313	75.2161	91.5173	93.5765	58.2018	263.23	200.187	163.274	97.4675	221.616	204.705
Class I AMG	K14266	prnA/rebH/ktzQ; tryptophan 7-halogenase [EC:1.14.19.9]	Metabolism	Biosynthesis of other secondary metabolites	Staurosporine biosynthesis	45.2441	72.3983	68.1323	138.771	337.5	337.5	2235.6	427.467	96.926	48.5113	40.4429	49.4592	40.2864	56.0867	257.105	194.237	149.334	95.5243	8.75052	14.5932
Class I AMG	K00978	rfbF; glucose-1-phosphate cytidylyltransferase [EC:2.7.7.33]	Metabolism	Carbohydrate metabolism	Amino sugar and nucleotide sugar metabolism	45.2441	72.3983	68.1323	138.771	337.5	337.5	2235.6	427.467	96.926	48.5113	40.4429	49.4592	40.2864	56.0867	257.105	194.237	149.334	95.5243	8.75052	14.5932
Class I AMG	K16011	algA/xanB/rfbA/wbpW/pslB; mannose-1-phosphate guanylyltransferase / mannose-6-phosphate isomerase [EC:2.7.7.13 5.3.1.8]	Metabolism	Carbohydrate metabolism	Fructose and mannose metabolism	45.2441	72.3983	68.1323	138.771	337.5	337.5	2235.6	427.467	96.926	48.5113	40.4429	49.4592	40.2864	56.0867	257.105	194.237	149.334	95.5243	8.75052	14.5932
Class I AMG	K01822	E5.3.3.1; steroid Delta-isomerase [EC:5.3.3.1]	Metabolism	Xenobiotics biodegradation and metabolism	Steroid degradation	45.2441	72.3983	68.1323	138.771	337.5	337.5	2235.6	427.467	96.926	48.5113	40.4429	49.4592	40.2864	56.0867	257.105	194.237	149.334	95.5243	8.75052	14.5932
Class I AMG	K02706	psbD; photosystem II reaction center D2 protein	Metabolism	Energy metabolism	Photosynthesis	45.2441	72.3983	68.1323	138.771	196.733	337.5	2235.6	427.467	96.926	48.5113	40.4429	49.4592	40.2864	56.0867	257.105	194.237	149.334	95.5243	8.75052	14.5932
Class II AMG	K02040	pstS; phosphate transport system substrate-binding protein	Environmental Information Processing	Membrane transport	ABC transporters	45.2441	72.3983	68.1323	138.771	196.733	337.5	2235.6	427.467	96.926	48.5113	40.4429	49.4592	40.2864	56.0867	257.105	194.237	149.334	95.5243	8.75052	14.5932
Class I AMG	K05524	ferredoxin	Not Included in Pathway or Brite	Unclassified: metabolism	Energy metabolism	45.2441	72.3983	68.1323	138.771	196.733	337.5	2235.6	427.467	96.926	48.5113	40.4429	49.4592	40.2864	56.0867	257.105	194.237	149.334	95.5243	8.75052	14.5932
Class I AMG	K00616	E2.2.1.2/talA/talB; transaldolase [EC:2.2.1.2]	Metabolism	Carbohydrate metabolism	Pentose phosphate pathway	0	0	30.6812	81.5429	75.2366	75.2366	148.947	198.595	566.025	0	0	0	211.537	1612.01	429.727	1.85255	10.6837	4.8399	0	0
Class I AMG	K01628	fucA; L-fuculose-phosphate aldolase [EC:4.1.2.17]	Metabolism	Carbohydrate metabolism	Fructose and mannose metabolism	134.229	200.427	109.313	179.382	197.594	197.594	186.909	122.526	112.751	102.668	106.79	66.3498	66.0635	111.874	198.062	151.466	185.69	124.965	165.678	172.338
Class I AMG	K00737	MGAT3; beta-1,4-mannosyl-glycoprotein beta-1,4-N-acetylglucosaminyltransferase [EC:2.4.1.144]	Metabolism	Glycan biosynthesis and metabolism	N-Glycan biosynthesis	255.765	189.549	157.286	23.5422	27.1049	27.1049	59.9895	86.1769	61.4077	101.627	50.4765	9.80395	45.9072	77.8191	145.973	157.558	109.581	122.102	255.372	216.827
Class I AMG	/	cp12;,calvin cycle protein inhibitor	Not Included in Pathway or Brite	Unclassified: metabolism	/	454.407	255.22	113.637	5.03366	6.76491	7.92941	22.5831	24.6483	35.7512	185.24	53.4639	32.3322	30.7252	48.7792	117.724	51.4613	36.273	32.8645	350.763	291.177
Class I AMG	K02843	waaF/rfaF; heptosyltransferase II [EC:2.4.-.-]	Metabolism	Glycan biosynthesis and metabolism	Lipopolysaccharide biosynthesis	71.172	95.6945	171.45	43.6525	8.56712	8.56712	4.01893	3.15617	4.21959	128.186	88.0233	37.3851	44.639	15.2625	5.84864	5.46737	6.08878	4.40022	347.727	599.644
Class I AMG	K00860	cysC; adenylylsulfate kinase [EC:2.7.1.25]	Metabolism	Energy metabolism	Sulfur metabolism	125.663	122.883	73.4925	59.7464	189.269	189.269	35.3469	18.6551	15.6681	267.047	54.9158	62.7306	38.5728	75.7126	34.3953	14.0957	51.9355	16.367	87.2583	56.3777
Class I AMG	K00012	UGDH/ugd; UDPglucose 6-dehydrogenase [EC:1.1.1.22]	Metabolism	Carbohydrate metabolism	Pentose and glucuronate interconversions	75.2095	43.4047	126.839	29.1113	23.5471	23.5471	3.69627	0	5.46145	54.3893	162.325	256.44	100.161	98.7342	7.19353	7.86137	0	0	86.3927	182.239
Class I AMG	K01854	glf; UDP-galactopyranose mutase [EC:5.4.99.9]	Metabolism	Carbohydrate metabolism	Galactose metabolism	44.5624	77.868	43.7666	32.2918	5.1796	5.1796	4.72318	7.25915	7.25046	150.165	108.145	86.8696	77.0392	21.9109	20.0256	30.5161	10.4938	19.7077	175.296	275.91
Class I AMG	K13017	wbpE/wlbC; UDP-2-acetamido-2-deoxy-ribo-hexuluronate aminotransferase [EC:2.6.1.98]	Metabolism	Carbohydrate metabolism	Amino sugar and nucleotide sugar metabolism	76.0131	64.2752	77.5278	66.9661	34.777	34.777	0	0	0	59.8633	238	107.534	192.587	77.3738	7.22843	21.0653	0	0	75.4328	48.907
Class I AMG	K00287	DHFR/folA; dihydrofolate reductase [EC:1.5.1.3]	Metabolism	Metabolism of cofactors and vitamins	Folate biosynthesis	76.0131	64.2752	77.5278	66.9661	34.777	34.777	0	0	0	59.8633	238	107.534	192.587	77.3738	7.22843	21.0653	0	0	75.4328	48.907
Class I AMG	K19551	pelC; pectate lyase C [EC:4.2.2.2 4.2.2.10]	Metabolism	Carbohydrate metabolism	Pentose and glucuronate interconversions	128.425	110.092	135.269	30.4202	0	0	0	3.20723	1.96415	271.833	125.569	39.9671	61.1909	14.7395	31.045	5.65452	0	0	51.628	122.327
Class I AMG	K00507	SCD/desC; stearoyl-CoA desaturase (Delta-9 desaturase) [EC:1.14.19.1]	Metabolism	Lipid metabolism	Biosynthesis of unsaturated fatty acids	167.687	118.146	101.602	85.2252	3.65518	3.65518	3.47001	0	15.7563	204.693	79.7344	40.6585	77.193	16.7839	14.9679	13.1998	6.08776	0	75.7821	83.7233
Class I AMG	K00472	P4HA; prolyl 4-hydroxylase [EC:1.14.11.2]	Metabolism	Amino acid metabolism	Arginine and proline metabolism	10.812	28.0994	40.1065	8.65768	7.23701	7.23701	2.94445	5.92	2.61035	164.931	158.796	148.416	72.1664	7.16289	2.36885	2.08745	2.74893	0	208.977	220.613
Class I AMG	K02849	waaQ/rfaQ; heptosyltransferase III [EC:2.4.-.-]	Metabolism	Glycan biosynthesis and metabolism	Lipopolysaccharide biosynthesis	58.232	57.0429	33.7722	5.70596	8.56712	8.56712	4.01893	3.15617	4.21959	28.4397	16.7715	24.3276	15.6861	10.0093	3.31301	3.62002	6.08878	4.40022	333.493	470.621
Class I AMG	K02536	lpxD; UDP-3-O-[3-hydroxymyristoyl] glucosamine N-acyltransferase [EC:2.3.1.191]	Metabolism	Glycan biosynthesis and metabolism	Lipopolysaccharide biosynthesis	63.0202	40.0546	91.0576	116.675	47.2618	47.2618	11.2169	3.34165	3.68301	82.0266	41.308	104.088	87.0442	12.5628	4.85107	0	1.2739	2.30838	125.962	180.866
Class II AMG	K21140	mec; [CysO sulfur-carrier protein]-S-L-cysteine hydrolase [EC:3.13.1.6]	Genetic Information Processing	Folding, sorting and degradation	Sulfur relay system	51.6607	40.2746	59.3108	83.642	74.6663	74.6663	54.2151	13.9954	5.65014	102.458	79.8625	33.5394	22.157	13.4934	13.5832	10.4393	6.84133	2.47938	144.465	175.882
Class I AMG	K00886	ppgK;polyphosphate glucokinase [EC:2.7.1.63] [RN:R02189]	Metabolism	Carbohydrate metabolism	Amino sugar and nucleotide sugar metabolism	30.9494	36.8442	52.4959	57.3586	48.4393	17.792	2.23553	4.19503	3.08291	80.319	150.659	148.117	115.916	99.9008	7.97628	1.58487	0	0.690094	75.1258	44.8749
Class I AMG	K16066	ydfG; 3-hydroxy acid dehydrogenase / malonic semialdehyde reductase [EC:1.1.1.381 1.1.1.-]	Metabolism	Amino acid metabolism	Glycine, serine and threonine metabolism	21.8368	31.6539	83.5197	25.1571	44.9578	44.9578	12.8041	0.572074	1.26125	2.86622	89.5908	159.213	99.3608	50.1916	13.8437	8.06878	4.36246	0.658754	33.4338	172.035
Class I AMG	K01737	queD/ptpS/PTS; 6-pyruvoyltetrahydropterin/6-carboxytetrahydropterin synthase [EC:4.2.3.12 4.1.2.50]	Metabolism	Metabolism of cofactors and vitamins	Folate biosynthesis	41.1369	39.869	47.1656	27.2025	20.8135	20.8135	7.0389	3.59164	3.68722	35.9899	37.4852	18.9178	22.7274	22.7413	8.1091	11.4238	10.3298	1.1085	96.5673	400.668
Class I AMG	K16870	wbbL; N-acetylglucosaminyl-diphospho-decaprenol L-rhamnosyltransferase [EC:2.4.1.289]	Metabolism	Glycan biosynthesis and metabolism	Arabinogalactan biosynthesis - Mycobacterium	126.22	131.361	93.1815	11.8706	1.72835	1.72835	3.51043	1.71891	3.18484	128.125	38.3181	5.45244	46.5095	10.0018	6.6806	1.23058	1.11218	0	124.537	136.686
Class I AMG	K05535	MNN2; alpha 1,2-mannosyltransferase [EC:2.4.1.-]	Metabolism	Glycan biosynthesis and metabolism	Various types of N-glycan biosynthesis	86.3682	132.226	58.3709	9.62909	0.361154	0.361154	1.02857	1.24081	5.31921	99.4676	101.421	19.7575	11.4286	3.11039	11.5102	3.64601	14.193	2.14322	96.442	53.0104
Class I AMG	K12450	RHM; UDP-glucose 4,6-dehydratase [EC:4.2.1.76]	Metabolism	Carbohydrate metabolism	Amino sugar and nucleotide sugar metabolism	27.3758	44.6412	62.0238	50.2281	21.7466	21.7466	9.19488	6.262	20.0771	45.7077	62.5597	60.1882	17.3183	5.97213	17.0278	12.842	19.9213	14.2343	93.2858	80.3144
Class I AMG	K08678	UXS1/uxs; UDP-glucuronate decarboxylase [EC:4.1.1.35]	Metabolism	Carbohydrate metabolism	Amino sugar and nucleotide sugar metabolism	27.3758	44.6412	62.0238	50.2281	21.7466	21.7466	9.19488	6.262	20.0771	45.7077	62.5597	60.1882	17.3183	5.97213	17.0278	12.842	19.9213	14.2343	93.2858	80.3144
Class I AMG	K23144	E2.7.7.24/rfbA/rffH; glucose-1-phosphate thymidylyltransferase [EC:2.7.7.24]	Metabolism	Metabolism of terpenoids and polyketides	Polyketide sugar unit biosynthesis	27.3758	44.6412	62.0238	50.2281	21.7466	21.7466	9.19488	6.262	20.0771	45.7077	62.5597	60.1882	17.3183	5.97213	17.0278	12.842	19.9213	14.2343	93.2858	80.3144
Class I AMG	K16437	evaC; methylation protein EvaC	Metabolism	Metabolism of terpenoids and polyketides	Biosynthesis of vancomycin group antibiotics	79.9229	80.4107	41.2706	18.8476	2.08597	2.08597	2.0793	3.4639	3.07228	116.697	52.6719	6.45004	12.2589	3.89243	8.09331	12.6353	6.52775	2.61332	78.8119	125.961
Class I AMG	K09883	cobT; cobaltochelatase CobT [EC:6.6.1.2]	Metabolism	Metabolism of cofactors and vitamins	Porphyrin and chlorophyll metabolism	22.5662	24.3587	43.2655	25.4975	8.10064	8.10064	0.480641	1.54617	1.98848	170.911	62.1284	40.944	60.2706	34.3983	17.305	3.40748	2.94766	1.55789	9.57874	114.602
Class I AMG	K13379	RGP/UTM; reversibly glycosylated polypeptide / UDP-arabinopyranose mutase [EC:2.4.1.- 5.4.99.30]	Metabolism	Carbohydrate metabolism	Amino sugar and nucleotide sugar metabolism	15.8016	12.8628	7.86767	2.95205	2.98947	2.98947	0.709506	0.760803	0.698889	16.4384	10.1902	11.0609	4.12938	3.33749	1.38081	0.335334	0	0.10951	141.512	342.728
Class I AMG	K02841	waaC/rfaC; heptosyltransferase I [EC:2.4.-.-]	Metabolism	Glycan biosynthesis and metabolism	Lipopolysaccharide biosynthesis	40.5142	30.8141	39.0259	57.0466	3.5012	3.5012	0	4.00966	0	75.3349	61.9678	54.1305	35.6123	25.128	19.4061	0	0	0	68.8346	51.8726
Class I AMG	K00820	glmS/GFPT; glutamine---fructose-6-phosphate transaminase (isomerizing) [EC:2.6.1.16]	Metabolism	Carbohydrate metabolism	Amino sugar and nucleotide sugar metabolism	9.10755	13.7154	13.8174	45.1172	64.4607	64.4607	8.57404	10.546	7.45212	11.1772	16.7163	20.2184	22.4157	34.5703	8.83399	9.29656	17.012	1.86829	51.7402	107.233
Class I AMG	K03270	kdsC; 3-deoxy-D-manno-octulosonate 8-phosphate phosphatase (KDO 8-P phosphatase) [EC:3.1.3.45]	Metabolism	Glycan biosynthesis and metabolism	Lipopolysaccharide biosynthesis	20.2612	50.1508	64.863	11.5865	3.89212	3.89212	1.85649	2.27221	0	90.2018	39.861	28.044	26.3923	13.2357	12.6193	7.85854	1.92524	0	78.1288	75.3994
Class I AMG	K06920	queC; 7-cyano-7-deazaguanine synthase [EC:6.3.4.20]	Metabolism	Metabolism of cofactors and vitamins	Folate biosynthesis	12.4286	18.4947	33.964	19.2986	16.8114	16.8114	4.18944	2.40661	1.94547	24.1153	16.8609	13.9954	18.0496	10.8589	5.24141	9.33454	5.81147	1.1085	36.4647	232.606
Class I AMG	K02472	wecC; UDP-N-acetyl-D-mannosaminuronic acid dehydrogenase [EC:1.1.1.336]	Metabolism	Carbohydrate metabolism	Amino sugar and nucleotide sugar metabolism	27.7511	46.9316	10.614	5.64189	0.634824	0.634824	0	0.727016	0.534281	31.872	16.4791	15.0996	15.784	10.0234	3.51864	0	4.61999	0.418586	98.7342	50.1254
Class I AMG	K22230	iolU; scyllo-inositol 2-dehydrogenase (NADP+) [EC:1.1.1.-]	Metabolism	Carbohydrate metabolism	Inositol phosphate metabolism	27.7511	46.9316	10.614	5.64189	0.634824	0.634824	0	0.727016	0.534281	31.872	16.4791	15.0996	15.784	10.0234	3.51864	0	4.61999	0.418586	98.7342	50.1254
Class I AMG	K07404	pgl; 6-phosphogluconolactonase [EC:3.1.1.31]	Metabolism	Carbohydrate metabolism	Pentose phosphate pathway	0	4.64685	26.9739	1.30345	6.15989	6.15989	0	0	1.48123	13.8853	12.4599	41.8617	19.8905	10.105	0	0.888384	0	0	1.24114	95.1799
Class I AMG	K03272	gmhC/hldE/waaE/rfaE; D-beta-D-heptose 7-phosphate kinase / D-beta-D-heptose 1-phosphate adenosyltransferase [EC:2.7.1.167 2.7.7.70]	Metabolism	Glycan biosynthesis and metabolism	Lipopolysaccharide biosynthesis	25.278	7.28557	5.76696	0	0	0	0	1.18504	1.74176	11.8746	4.88381	4.92247	4.6778	11.8823	2.86769	2.08928	4.51835	0	60.1025	57.4512
Class I AMG	K00010	iolG; myo-inositol 2-dehydrogenase / D-chiro-inositol 1-dehydrogenase [EC:1.1.1.18 1.1.1.369]	Metabolism	Carbohydrate metabolism	Inositol phosphate metabolism	9.00622	0	13.013	0	0	0	0	1.33701	0	6.69871	0	0	0	0	0	0	0	0	99.8522	71.2582
Class I AMG	K08965	mtnW; 2,3-diketo-5-methylthiopentyl-1-phosphate enolase [EC:5.3.2.5]	Metabolism	Amino acid metabolism	Cysteine and methionine metabolism	14.2795	4.88727	0	2.05633	8.32962	8.32962	0.988455	0	0	39.8283	0	0	0	0	0	0	0	0	33.4646	77.6753

## Sheet: S9
AMG classification	KOa	gene_description	KEGG pathway1	KEGG pathway2	KEGG pathway3	CES1	CES2	CES3	CES4	CES5	CES6	CES7	CES8	CES9	CWS1	CWS2	CWS3	CWS4	CWS5	CWS6	CWS7	CWS8	CWS9	CEW	CWW
Class I AMG	K09882	cobS; cobaltochelatase CobS [EC:6.6.1.2]	Metabolism	Metabolism of cofactors and vitamins	Porphyrin and chlorophyll metabolism	36.9808	25.5088	14.916	3.84056	1.94463	1.94463	0	0.742344	0.272773	75.2957	9.17812	20.0433	8.05838	3.72173	1.79641	2.61758	1.41522	0	173.434	143.363
Class I AMG	K00432	gpx; glutathione peroxidase [EC:1.11.1.9]	Metabolism	Metabolism of other amino acids	Glutathione metabolism	49.1837	38.4766	7.61414	16.1892	24.5916	24.5916	0	6.25843	2.29965	31.3561	128.962	214.472	98.8178	31.3766	0	0	0	9.00837	40.5235	295.891
Class I AMG	K02703	psbA; photosystem II P680 reaction center D1 protein [EC:1.10.3.9]	Metabolism	Energy metabolism	Photosynthesis	227.522	215.708	88.3394	30.1365	14.6678	14.6678	20.2133	33.8668	46.3923	211.761	49.1297	6.75254	23.5286	42.1081	108.836	73.0837	92.6283	46.7979	224.551	204.117
Class I AMG	K01784	galE, GALE; UDP-glucose 4-epimerase [EC:5.1.3.2]	Metabolism	Carbohydrate metabolism	Galactose metabolism	227.522	215.708	88.3394	30.1365	14.6678	14.6678	20.2133	33.8668	46.3923	211.761	49.1297	6.75254	23.5286	42.1081	108.836	73.0837	92.6283	46.7979	224.551	204.117
Class II AMG	K03271	gmhA, lpcA; D-sedoheptulose 7-phosphate isomerase [EC:5.3.1.28]	Metabolism	Glycan biosynthesis and metabolism	Lipopolysaccharide biosynthesis	227.522	215.708	88.3394	30.1365	14.6678	14.6678	20.2133	33.8668	46.3923	211.761	49.1297	6.75254	23.5286	42.1081	108.836	73.0837	92.6283	46.7979	224.551	204.117
Class I AMG	K01628	fucA; L-fuculose-phosphate aldolase [EC:4.1.2.17]	Metabolism	Carbohydrate metabolism	Fructose and mannose metabolism	227.522	215.708	88.3394	30.1365	14.6678	14.6678	20.2133	33.8668	46.3923	211.761	49.1297	6.75254	23.5286	42.1081	108.836	73.0837	92.6283	46.7979	224.551	204.117
Class I AMG	K23144	K23144; UDP-N-acetylglucosamine diphosphorylase / glucose-1-phosphate thymidylyltransferase / UDP-N-acetylgalactosamine diphosphorylase / glucosamine-1-phosphate N-acetyltransferase / galactosamine-1-phosphate N-acetyltransferase [EC:2.7.7.23 2.7.7.24 2.7.7.83 2.3.1.157 2.3.1.276]	Metabolism	Metabolism of terpenoids and polyketides	Polyketide sugar unit biosynthesis	227.522	215.708	88.3394	30.1365	14.6678	14.6678	20.2133	33.8668	46.3923	211.761	49.1297	6.75254	23.5286	42.1081	108.836	73.0837	92.6283	46.7979	224.551	204.117
Class I AMG	K01711	gmd, GMDS; GDPmannose 4,6-dehydratase [EC:4.2.1.47]	Metabolism	Carbohydrate metabolism	Fructose and mannose metabolism	227.522	215.708	88.3394	30.1365	14.6678	14.6678	20.2133	33.8668	46.3923	211.761	49.1297	6.75254	23.5286	42.1081	108.836	73.0837	92.6283	46.7979	224.551	204.117
Class I AMG	K00613	GATM; glycine amidinotransferase [EC:2.1.4.1]	Metabolism	Amino acid metabolism	Glycine, serine and threonine metabolism	15.2816	8.96614	11.8287	7.54507	0	0	1.20894	1.45839	1.42902	24.3562	6.01036	16.1545	7.67577	0	0	0	0	0	54.79	56.2269
Class I AMG	K02377	TSTA3, fcl; GDP-L-fucose synthase [EC:1.1.1.271]	Metabolism	Carbohydrate metabolism	Fructose and mannose metabolism	36.0191	24.3656	13.7763	37.1022	4.94376	4.94376	2.11199	6.41661	3.606	19.8565	16.3333	21.1661	52.1476	26.9657	14.6143	20.962	11.2733	1.95587	92.6459	46.463
Class I AMG	K01710	E4.2.1.46, rfbB, rffG; dTDP-glucose 4,6-dehydratase [EC:4.2.1.46]	Metabolism	Metabolism of terpenoids and polyketides	Polyketide sugar unit biosynthesis	36.0191	24.3656	13.7763	37.1022	4.94376	4.94376	2.11199	6.41661	3.606	19.8565	16.3333	21.1661	52.1476	26.9657	14.6143	20.962	11.2733	1.95587	92.6459	46.463
Class I AMG	K00966	GMPP; mannose-1-phosphate guanylyltransferase [EC:2.7.7.13]	Metabolism	Carbohydrate metabolism	Fructose and mannose metabolism/Amino sugar and nucleotide sugar metabolism	36.0191	24.3656	13.7763	37.1022	4.94376	4.94376	2.11199	6.41661	3.606	19.8565	16.3333	21.1661	52.1476	26.9657	14.6143	20.962	11.2733	1.95587	92.6459	46.463
Class I AMG	K00616	talC;transaldolase [EC:2.2.1.2] [RN:R01827]	Metabolism	Carbohydrate metabolism	Pentose phosphate pathway	227.522	215.708	88.3394	30.1365	19.3088	14.6678	20.2133	33.8668	46.3923	211.761	49.1297	6.75254	23.5286	42.1081	108.836	73.0837	92.6283	46.7979	224.551	204.117
Class I AMG	K02706	psbD; photosystem II reaction center D2 protein	Metabolism	Energy metabolism	Photosynthesis	227.522	215.708	88.3394	30.1365	19.3088	14.6678	20.2133	33.8668	46.3923	211.761	49.1297	6.75254	23.5286	42.1081	108.836	73.0837	92.6283	46.7979	224.551	204.117

[truncated: 2 more sheets: S10, S11]
